# Supplementary material for: Whole genome sequencing analysis of high confidence variants of B-cell lymphoma in Canis familiaris
Source: PLoS One. 2020 Aug 28;15(8):e0238183. doi: 10.1371/journal.pone.0238183 (PMC7454977; doi:10.1371/journal.pone.0238183)
Supplement: S2 File — (XLSX) [file pone.0238183.s002.xlsx]

## Sheet: Sheet1
Case	Indel Type	Chromosome	Location	Allele	Consequence	IMPACT	SYMBOL	Gene	Feature_type	Feature	BIOTYPE	EXON	INTRON	HGVSc	HGVSp	cDNA_position	CDS_position	Protein_position	Amino_acids	Codons	Existing_variation	DISTANCE	STRAND	FLAGS	SYMBOL_SOURCE	HGNC_ID	TSL	APPRIS	SIFT	CLIN_SIG	SOMATIC	PHENO	HGVSc
G1	Indel.LOH	1	1:110148630-110148633	-	inframe_deletion	MODERATE	CD3EAP	ENSCAFG00000004455	Transcript	ENSCAFT00000007180	protein_coding	2/3	-	-	-	639-641	180-182	60-61	PF/P	ccATTc/ccc	rs852110586	-	-1	-	VGNC	-	-	-	-	-	-	-	ENSCAFT00000007180.5:c.180_182del
G1	Indel.Somatic	1	1:69383798-69383798	T	frameshift_variant	HIGH	-	ENSCAFG00000028602	Transcript	ENSCAFT00000042989	protein_coding	1/1	-	-	-	205-206	205-206	69	R/KX	aga/aAga	-	-	-1	-	-	-	-	-	-	-	-	-
G1	Indel.LOH	2	2:48723570-48723572	-	frameshift_variant	HIGH	DIMT1	ENSCAFG00000007211	Transcript	ENSCAFT00000011566	protein_coding	7/13	-	-	-	472-473	472-473	158	L/X	TTa/a	-	-	-1	-	HGNC	HGNC:30217	-	-	-	-	-	-
G1	Indel.LOH	3	3:35447408-35447410	-	frameshift_variant	HIGH	-	ENSCAFG00000030210	Transcript	ENSCAFT00000045775	protein_coding	1/1	-	-	-	130-131	130-131	44	K/X	AAg/g	-	-	-1	-	-	-	-	-	-	-	-	-
G1	Indel.Somatic	5	5:32563439-32563439	TAGTCAACTATAG	frameshift_variant	HIGH	TP53	ENSCAFG00000016714	Transcript	ENSCAFT00000026465	protein_coding	7/11	-	-	-	814-815	664-665	222	I/TIVDYX	atc/aCTATAGTTGACTAtc	-	-	-1	-	VGNC	-	-	-	-	-	-	-	ENSCAFT00000026465.4:c.658_659insCTATAGTTGACTA
G1	Indel.LOH	5	5:41480390-41480390	CAG	inframe_insertion	MODERATE	ATPAF2	ENSCAFG00000018396	Transcript	ENSCAFT00000029226	protein_coding	1/9	-	-	-	102-103	42-43	14-15	-/Q	-/CAG	-	-	1	-	VGNC	-	-	-	-	-	-	-
G1	Indel.LOH	7	7:164148-164148	GGGGCGGCG	inframe_insertion	MODERATE	-	ENSCAFG00000029186	Transcript	ENSCAFT00000043865	protein_coding	1/1	-	-	-	628-629	628-629	210	R/PPPR	cgc/cCGCCGCCCCgc	-	-	-1	-	-	-	-	-	-	-	-	-
G1	Indel.LOH	7	7:29257443-29257445	-	frameshift_variant	HIGH	NME7	ENSCAFG00000015252	Transcript	ENSCAFT00000024207	protein_coding	1/11	-	-	-	31-32	31-32	11	A/X	GCa/a	-	-	1	-	VGNC	-	-	-	-	-	-	-	ENSCAFT00000024207.4:c.31_32del
G1	Indel.LOH	7	7:29257443-29257445	-	frameshift_variant	HIGH	NME7	ENSCAFG00000015252	Transcript	ENSCAFT00000038019	protein_coding	2/8	-	-	-	31-32	31-32	11	A/X	GCa/a	-	-	1	-	VGNC	-	-	-	-	-	-	-
G1	Indel.LOH	7	7:29258375-29258378	-	inframe_deletion	MODERATE	NME7	ENSCAFG00000015252	Transcript	ENSCAFT00000024207	protein_coding	2/11	-	-	-	211-213	211-213	71	R/-	CGA/-	-	-	1	-	VGNC	-	-	-	-	-	-	-	ENSCAFT00000024207.4:c.212_214del
G1	Indel.LOH	7	7:29258375-29258378	-	inframe_deletion	MODERATE	NME7	ENSCAFG00000015252	Transcript	ENSCAFT00000038019	protein_coding	3/8	-	-	-	211-213	211-213	71	R/-	CGA/-	-	-	1	-	VGNC	-	-	-	-	-	-	-
G1	Indel.LOH	7	7:29272928-29272932	-	frameshift_variant	HIGH	NME7	ENSCAFG00000015252	Transcript	ENSCAFT00000024207	protein_coding	3/11	-	-	-	339-342	339-342	113-114	IN/X	atAAAC/at	-	-	1	-	VGNC	-	-	-	-	-	-	-	ENSCAFT00000024207.4:c.342_345del
G1	Indel.LOH	7	7:29272928-29272932	-	frameshift_variant	HIGH	NME7	ENSCAFG00000015252	Transcript	ENSCAFT00000038019	protein_coding	4/8	-	-	-	339-342	339-342	113-114	IN/X	atAAAC/at	-	-	1	-	VGNC	-	-	-	-	-	-	-
G1	Indel.LOH	7	7:80974270-80974273	-	inframe_deletion	MODERATE	-	ENSCAFG00000029384	Transcript	ENSCAFT00000043311	protein_coding	3/3	-	-	-	1943-1945	1166-1168	389-390	SA/S	tCCGcc/tcc	rs850875903	-	1	-	-	-	-	-	-	-	-	-
G1	Indel.LOH	8	8:31109087-31109087	CCGCCGCCGCCG	inframe_insertion	MODERATE	FBXO34	ENSCAFG00000015040	Transcript	ENSCAFT00000023871	protein_coding	1/2	-	-	-	1017-1018	84-85	28-29	-/PPPP	-/CCGCCGCCGCCG	-	-	1	-	VGNC	-	-	-	-	-	-	-	ENSCAFT00000023871.4:c.95_106dup
G1	Indel.Somatic	8	8:73886104-73886105	-	frameshift_variant	HIGH	-	ENSCAFG00000030001	Transcript	ENSCAFT00000050006	protein_coding	2/2	-	-	-	414	350	117	K/X	aAg/ag	-	-	-1	-	-	-	-	-	-	-	-	-	ENSCAFT00000050006.2:c.293del
G1	Indel.LOH	9	9:10288574-10288576	-	frameshift_variant	HIGH	-	ENSCAFG00000029478	Transcript	ENSCAFT00000045275	protein_coding	1/4	-	-	-	624-625	624-625	208-209	KF/NX	aaGTtt/aatt	-	-	1	-	-	-	-	-	-	-	-	-
G1	Indel.Somatic	9	9:2369722-2369722	C	frameshift_variant	HIGH	RBFOX3	ENSCAFG00000005547	Transcript	ENSCAFT00000008934	protein_coding	6/11	-	-	-	416-417	416-417	139	Y/YX	tac/taCc	-	-	1	-	VGNC	-	-	-	-	-	-	-	ENSCAFT00000008934.4:c.510dup
G1	Indel.Somatic	9	9:2369722-2369722	C	frameshift_variant	HIGH	RBFOX3	ENSCAFG00000005547	Transcript	ENSCAFT00000046179	protein_coding	6/9	-	-	-	488-489	461-462	154	Y/YX	tac/taCc	-	-	1	-	VGNC	-	-	-	-	-	-	-	ENSCAFT00000046179.3:c.603dup
G1	Indel.Somatic	9	9:7660965-7660978	-	splice_acceptor_variant,non_coding_transcript_exon_variant,intron_variant	HIGH	-	ENSCAFG00000036485	Transcript	ENSCAFT00000056579	lincRNA	2/4	1/3	-	-	?-220	-	-	-	-	-	-	1	-	-	-	-	-	-	-	-	-
G1	Indel.Somatic	10	10:28136917-28136918	-	frameshift_variant	HIGH	-	ENSCAFG00000001689	Transcript	ENSCAFT00000002644	protein_coding	4/5	-	-	-	981	981	327	N/X	aaT/aa	rs850767066	-	1	-	-	-	-	-	-	-	-	-
G1	Indel.Somatic	10	10:68532152-68532152	CGGTC	frameshift_variant	HIGH	-	ENSCAFG00000031596	Transcript	ENSCAFT00000044171	protein_coding	1/1	-	-	-	243-244	243-244	81-82	-/DX	-/GACCG	-	-	-1	-	-	-	-	-	-	-	-	-
G1	Indel.Somatic	12	12:49630532-49630532	TTTTTC	protein_altering_variant	MODERATE	-	ENSCAFG00000029840	Transcript	ENSCAFT00000043519	protein_coding	1/4	-	-	-	397-398	397-398	133	E/GKK	gaa/gGAAAAAaa	-	-	-1	-	-	-	-	-	-	-	-	-	ENSCAFT00000043519.2:c.523_524insGAAAAA
G1	Indel.LOH	13	13:32757206-32757209	-	inframe_deletion	MODERATE	-	ENSCAFG00000029044	Transcript	ENSCAFT00000043730	protein_coding	1/1	-	-	-	1450-1452	1450-1452	484	K/-	AAG/-	-	-	-1	-	-	-	-	-	-	-	-	-	ENSCAFT00000043730.2:c.1309_1311del
G1	Indel.LOH	13	13:32757513-32757521	-	frameshift_variant	HIGH	-	ENSCAFG00000029044	Transcript	ENSCAFT00000043730	protein_coding	1/1	-	-	-	1138-1145	1138-1145	380-382	RQS/X	AGGCAGTCc/c	-	-	-1	-	-	-	-	-	-	-	-	-	ENSCAFT00000043730.2:c.997_1004del
G1	Indel.LOH	13	13:32758432-32758436	-	frameshift_variant	HIGH	-	ENSCAFG00000029044	Transcript	ENSCAFT00000043730	protein_coding	1/1	-	-	-	223-226	223-226	75-76	TP/X	ACTCca/ca	-	-	-1	-	-	-	-	-	-	-	-	-
G1	Indel.LOH	13	13:32758532-32758533	-	frameshift_variant	HIGH	-	ENSCAFG00000029044	Transcript	ENSCAFT00000043730	protein_coding	1/1	-	-	-	126	126	42	K/X	aaG/aa	rs852592769	-	-1	-	-	-	-	-	-	-	-	-	ENSCAFT00000043730.2:c.126del
G1	Indel.LOH	13	13:61888285-61888307	-	frameshift_variant	HIGH	COX18	ENSCAFG00000002962	Transcript	ENSCAFT00000004743	protein_coding	1/6	-	-	-	81-102	81-102	27-34	PPPGSPPA/X	ccCCCCCCGGGCTCCCCGCCCGCC/cc	-	-	-1	-	VGNC	-	-	-	-	-	-	-	ENSCAFT00000004743.3:c.81_102del
G1	Indel.Somatic	14	14:40329189-40329192	-	inframe_deletion	MODERATE	HOXA7	ENSCAFG00000002957	Transcript	ENSCAFT00000004737	protein_coding	2/2	-	-	-	655-657	655-657	219	A/-	GCC/-	rs851470433	-	-1	-	VGNC	-	-	-	-	-	-	-
G1	Indel.LOH	16	16:13795915-13795915	GCTGTAGGATTAA	stop_gained,frameshift_variant	HIGH	-	ENSCAFG00000030348	Transcript	ENSCAFT00000045983	protein_coding	2/4	-	-	-	416-417	416-417	139	A/A*SYSX	gca/gcTTAATCCTACAGCa	rs850812483	-	-1	-	-	-	-	-	-	-	-	-
G1	Indel.LOH	16	16:33560543-33560545	-	frameshift_variant	HIGH	PPP2CB	ENSCAFG00000006453	Transcript	ENSCAFT00000010425	protein_coding	5/7	-	-	-	1088-1089	702-703	234-235	LT/LX	ctCAca/ctca	-	-	1	-	VGNC	-	-	-	-	-	-	-	ENSCAFT00000010425.4:c.705_706del
G1	Indel.LOH	16	16:47445467-47445467	TTTGGGAACAGGGG	frameshift_variant	HIGH	TENM3	ENSCAFG00000008123	Transcript	ENSCAFT00000013138	protein_coding	27/28	-	-	-	7290-7291	7290-7291	2430-2431	-/PLFPX	-/CCCCTGTTCCCAAA	-	-	-1	-	VGNC	-	-	-	-	-	-	-	ENSCAFT00000013138.4:c.6927_6928insCCCCTGTTCCCAAA
G1	Indel.LOH	16	16:47445467-47445467	TTTGGGAACAGGGG	frameshift_variant	HIGH	TENM3	ENSCAFG00000008123	Transcript	ENSCAFT00000045575	protein_coding	24/25	-	-	-	6785-6786	6480-6481	2160-2161	-/PLFPX	-/CCCCTGTTCCCAAA	-	-	-1	-	VGNC	-	-	-	-	-	-	-	ENSCAFT00000045575.3:c.6876_6877insCCCCTGTTCCCAAA
G1	Indel.LOH	16	16:47445471-47445471	GGG	inframe_insertion	MODERATE	TENM3	ENSCAFG00000008123	Transcript	ENSCAFT00000013138	protein_coding	27/28	-	-	-	7286-7287	7286-7287	2429	F/FP	ttt/ttCCCt	-	-	-1	-	VGNC	-	-	-	-	-	-	-	ENSCAFT00000013138.4:c.6923_6924insCCC
G1	Indel.LOH	16	16:47445471-47445471	GGG	inframe_insertion	MODERATE	TENM3	ENSCAFG00000008123	Transcript	ENSCAFT00000045575	protein_coding	24/25	-	-	-	6781-6782	6476-6477	2159	F/FP	ttt/ttCCCt	-	-	-1	-	VGNC	-	-	-	-	-	-	-	ENSCAFT00000045575.3:c.6872_6873insCCC
G1	Indel.LOH	16	16:47445530-47445531	-	frameshift_variant	HIGH	TENM3	ENSCAFG00000008123	Transcript	ENSCAFT00000013138	protein_coding	27/28	-	-	-	7227	7227	2409	W/X	tgG/tg	-	-	-1	-	VGNC	-	-	-	-	-	-	-	ENSCAFT00000013138.4:c.6864del
G1	Indel.LOH	16	16:47445530-47445531	-	frameshift_variant	HIGH	TENM3	ENSCAFG00000008123	Transcript	ENSCAFT00000045575	protein_coding	24/25	-	-	-	6722	6417	2139	W/X	tgG/tg	-	-	-1	-	VGNC	-	-	-	-	-	-	-	ENSCAFT00000045575.3:c.6813del
G1	Indel.LOH	16	16:54078383-54078384	-	frameshift_variant	HIGH	-	ENSCAFG00000014646	Transcript	ENSCAFT00000023252	protein_coding	1/2	-	-	-	89	89	30	A/X	gCt/gt	-	-	1	-	-	-	-	-	-	-	-	-
G1	Indel.LOH	17	17:31696378-31696378	G	frameshift_variant,splice_region_variant	HIGH	TMEM178A	ENSCAFG00000006467	Transcript	ENSCAFT00000010440	protein_coding	-	-	-	-	895-896	811-812	271	G/GX	ggg/gGgg	-	-	1	-	VGNC	-	-	-	-	-	-	-
G1	Indel.LOH	17	17:8964880-8964881	-	splice_donor_variant	HIGH	-	ENSCAFG00000029963	Transcript	ENSCAFT00000047663	protein_coding	-	1/2	-	-	-	-	-	-	-	-	-	1	-	-	-	-	-	-	-	-	-
G1	Indel.LOH	19	19:6283990-6283990	T	frameshift_variant	HIGH	-	ENSCAFG00000030512	Transcript	ENSCAFT00000045518	protein_coding	2/2	-	-	-	257-258	257-258	86	S/SX	tct/tcTt	-	-	1	-	-	-	-	-	-	-	-	-
G1	Indel.Somatic	20	20:41712352-41712352	G	frameshift_variant	HIGH	SETD2	ENSCAFG00000013392	Transcript	ENSCAFT00000021260	protein_coding	3/21	-	-	-	2642-2643	2642-2643	881	Q/QX	cag/caGg	-	-	1	-	VGNC	-	-	-	-	-	-	-	ENSCAFT00000021260.4:c.2643dup
G1	Indel.LOH	20	20:50958383-50958383	GGCGGGCCCGGG	inframe_insertion	MODERATE	ANGPTL6	ENSCAFG00000017920	Transcript	ENSCAFT00000028437	protein_coding	3/7	-	-	-	1010-1011	350-351	117	E/EAGPG	gag/gaGGCGGGCCCGGGg	-	-	1	-	VGNC	-	-	-	-	-	-	-	ENSCAFT00000028437.5:c.1017_1028dup
G1	Indel.Somatic	20	20:55237167-55237167	T	frameshift_variant,splice_region_variant	HIGH	UBXN6	ENSCAFG00000019059	Transcript	ENSCAFT00000030269	protein_coding	2/12	-	-	-	61-62	61-62	21	I/IX	atc/aTtc	rs852129638	-	1	-	VGNC	-	-	-	-	-	-	-
G1	Indel.Somatic	20	20:57339868-57339869	-	frameshift_variant	HIGH	-	ENSCAFG00000023709	Transcript	ENSCAFT00000048351	protein_coding	10/15	-	-	-	1198	1198	400	L/X	Ctg/tg	-	-	-1	-	-	-	-	-	-	-	-	-
G1	Indel.LOH	20	20:8332662-8332662	CCCCGC	inframe_insertion	MODERATE	PRRT3	ENSCAFG00000005211	Transcript	ENSCAFT00000008401	protein_coding	4/4	-	-	-	3484-3485	2876-2877	959	G/GPA	ggc/ggCCCCGCc	-	-	1	-	VGNC	-	-	-	-	-	-	-	ENSCAFT00000008401.5:c.2877_2882dup
G1	Indel.LOH	21	21:29937061-29937069	-	frameshift_variant	HIGH	-	ENSCAFG00000006532	Transcript	ENSCAFT00000010588	protein_coding	9/14	-	-	-	5417-5424	4971-4978	1657-1660	GVRG/GX	ggTGTGCGGGgg/gggg	-	-	-1	-	-	-	-	-	-	-	-	-
G1	Indel.LOH	22	22:6375934-6375940	-	inframe_deletion	MODERATE	TSC22D1	ENSCAFG00000004584	Transcript	ENSCAFT00000007397	protein_coding	1/3	-	-	-	101-106	101-106	34-36	SGG/S	aGCGGCGgc/agc	-	-	1	-	VGNC	-	-	-	-	-	-	-	ENSCAFT00000007397.6:c.134_139del
G1	Indel.LOH	22	22:6375934-6375940	-	inframe_deletion	MODERATE	TSC22D1	ENSCAFG00000004584	Transcript	ENSCAFT00000050068	protein_coding	1/2	-	-	-	359-364	101-106	34-36	SGG/S	aGCGGCGgc/agc	-	-	1	-	VGNC	-	-	-	-	-	-	-	ENSCAFT00000050068.2:c.134_139del
G1	Indel.LOH	24	24:22096444-22096444	G	frameshift_variant	HIGH	DNMT3B	ENSCAFG00000007268	Transcript	ENSCAFT00000011678	protein_coding	1/22	-	-	-	45-46	45-46	15-16	-/X	-/G	rs850958597	-	1	-	VGNC	-	-	-	-	-	-	-	ENSCAFT00000011678.5:c.98dup
G1	Indel.LOH	24	24:22096444-22096444	G	frameshift_variant	HIGH	DNMT3B	ENSCAFG00000007268	Transcript	ENSCAFT00000011684	protein_coding	2/22	-	-	-	42-43	42-43	14-15	-/X	-/G	rs850958597	-	1	-	VGNC	-	-	-	-	-	-	-
G1	Indel.Somatic	25	25:20943639-20943639	GG	frameshift_variant	HIGH	-	ENSCAFG00000029275	Transcript	ENSCAFT00000049793	protein_coding	2/2	-	-	-	646-647	646-647	216	P/RX	ccg/cGGcg	-	-	1	-	-	-	-	-	-	-	-	-
G1	Indel.LOH	25	25:3768602-3768604	-	frameshift_variant	HIGH	-	ENSCAFG00000032066	Transcript	ENSCAFT00000048925	protein_coding	1/1	-	-	-	1195-1196	1195-1196	399	A/X	GCc/c	-	-	-1	-	-	-	-	-	-	-	-	-
G1	Indel.Somatic	26	26:29539425-29539433	-	frameshift_variant	HIGH	-	ENSCAFG00000028556	Transcript	ENSCAFT00000045254	protein_coding	2/2	-	-	-	765-772	595-602	199-201	CAH/X	TGCGCGCAc/c	-	-	-1	-	-	-	-	-	-	-	-	-
G1	Indel.LOH	28	28:16267084-16267084	ATGATG	inframe_insertion	MODERATE	-	ENSCAFG00000010495	Transcript	ENSCAFT00000016672	protein_coding	1/1	-	-	-	670-671	670-671	224	Y/YDD	tat/tATGATGat	-	-	1	-	-	-	-	-	-	-	-	-	ENSCAFT00000016672.2:c.680_685dup
G1	Indel.LOH	28	28:16476730-16476734	-	splice_donor_variant,non_coding_transcript_exon_variant	HIGH	-	ENSCAFG00000039374	Transcript	ENSCAFT00000058370	lincRNA	1/2	1/1	-	-	40-?	-	-	-	-	rs850917564	-	1	-	-	-	-	-	-	-	-	-
G1	Indel.LOH	30	30:30780312-30780320	-	frameshift_variant	HIGH	-	ENSCAFG00000017316	Transcript	ENSCAFT00000027434	protein_coding	2/7	-	-	-	224-231	224-231	75-77	PHK/X	cCACACAAG/c	-	-	1	-	-	-	-	-	-	-	-	-
G1	Indel.LOH	30	30:30780312-30780320	-	frameshift_variant	HIGH	-	ENSCAFG00000017316	Transcript	ENSCAFT00000027720	protein_coding	2/5	-	-	-	224-231	224-231	75-77	PHK/X	cCACACAAG/c	-	-	1	-	-	-	-	-	-	-	-	-
G1	Indel.LOH	30	30:33897162-33897165	-	inframe_deletion	MODERATE	-	ENSCAFG00000029487	Transcript	ENSCAFT00000044515	protein_coding	1/1	-	-	-	640-642	640-642	214	A/-	GCC/-	rs852745913	-	1	-	-	-	-	-	-	-	-	-
G1	Indel.LOH	30	30:7641439-7641439	CGCCGCCCGCCGCCCGCCGCCCGCC	frameshift_variant	HIGH	CHST14	ENSCAFG00000009145	Transcript	ENSCAFT00000046119	protein_coding	1/2	-	-	-	9-10	9-10	3-4	-/RRPPPAARX	-/CGCCGCCCGCCGCCCGCCGCCCGCC	-	-	1	-	HGNC	HGNC:24464	-	-	-	-	-	-	ENSCAFT00000046119.2:c.822_846dup
G3	Indel.Somatic	1	1:103182941-103182941	C	frameshift_variant	HIGH	-	ENSCAFG00000028940	Transcript	ENSCAFT00000044713	protein_coding	4/5	-	-	-	724-725	646-647	216	D/GX	gat/gGat	-	-	-1	-	-	-	-	-	-	-	-	-
G3	Indel.LOH	1	1:117801672-117801673	-	frameshift_variant	HIGH	-	ENSCAFG00000007230	Transcript	ENSCAFT00000011589	protein_coding	1/3	-	-	-	8	8	3	R/X	cGg/cg	rs850663404	-	1	-	-	-	-	-	-	-	-	-
G3	Indel.LOH	1	1:71290507-71290507	A	splice_donor_variant,frameshift_variant	HIGH	PTCH1	ENSCAFG00000001246	Transcript	ENSCAFT00000001978	protein_coding	-	-	-	-	2601-2602	2601-2602	867-868	-/X	-/A	rs851061836	-	1	-	VGNC	-	-	-	-	-	-	-	ENSCAFT00000001978.4:c.2410dup
G3	Indel.Somatic	2	2:48645386-48645386	C	frameshift_variant	HIGH	KIF2A	ENSCAFG00000007191	Transcript	ENSCAFT00000044452	protein_coding	1/20	-	-	-	7-8	7-8	3	E/AX	gag/gCag	-	-	1	-	VGNC	-	-	-	-	-	-	-	ENSCAFT00000044452.3:c.7_8insC
G3	Indel.Somatic	2	2:74303945-74303945	T	frameshift_variant,splice_region_variant	HIGH	MAN1C1	ENSCAFG00000012769	Transcript	ENSCAFT00000020252	protein_coding	2/13	-	-	-	97-98	97-98	33	S/YX	tcc/tAcc	rs852881997	-	-1	-	VGNC	-	-	-	-	-	-	-	ENSCAFT00000020252.5:c.99_99+1insA
G3	Indel.Somatic	3	3:64874803-64874804	-	frameshift_variant	HIGH	-	ENSCAFG00000020296	Transcript	ENSCAFT00000032323	protein_coding	2/2	-	-	-	217	217	73	S/X	Agc/gc	-	-	-1	-	-	-	-	-	-	-	-	-	ENSCAFT00000032323.3:c.214del
G3	Indel.Somatic	3	3:64874812-64874813	-	frameshift_variant	HIGH	-	ENSCAFG00000020296	Transcript	ENSCAFT00000032323	protein_coding	2/2	-	-	-	208	208	70	M/X	Atg/tg	-	-	-1	-	-	-	-	-	-	-	-	-	ENSCAFT00000032323.3:c.205del
G3	Indel.Somatic	3	3:64874821-64874826	-	frameshift_variant	HIGH	-	ENSCAFG00000020296	Transcript	ENSCAFT00000032323	protein_coding	2/2	-	-	-	195-199	195-199	65-67	KKT/NX	aaGAAAAca/aaca	-	-	-1	-	-	-	-	-	-	-	-	-	ENSCAFT00000032323.3:c.192_196del
G3	Indel.Somatic	4	4:51379332-51379334	-	frameshift_variant	HIGH	EBF1	ENSCAFG00000017318	Transcript	ENSCAFT00000027476	protein_coding	1/17	-	-	-	101-102	101-102	34	A/X	gCC/g	-	-	1	-	VGNC	-	-	-	-	-	-	-	ENSCAFT00000027476.4:c.101_102del
G3	Indel.LOH	5	5:57227123-57227123	G	frameshift_variant	HIGH	MORN1	ENSCAFG00000019391	Transcript	ENSCAFT00000030830	protein_coding	16/16	-	-	-	1491-1492	1491-1492	497-498	-/X	-/C	-	-	-1	-	VGNC	-	-	-	-	-	-	-
G3	Indel.Somatic	5	5:64071644-64071704	-	splice_donor_variant,splice_acceptor_variant,non_coding_transcript_exon_variant,intron_variant	HIGH	-	ENSCAFG00000035758	Transcript	ENSCAFT00000052157	lincRNA	1/2	1/1	-	-	356-?	-	-	-	-	-	-	1	-	-	-	-	-	-	-	-	-
G3	Indel.Somatic	6	6:38339445-38339445	GCT	inframe_insertion	MODERATE	-	ENSCAFG00000019353	Transcript	ENSCAFT00000030755	protein_coding	1/5	-	-	-	439-440	20-21	7	A/AL	gcg/gcGCTg	-	-	1	-	-	-	-	-	-	-	-	-
G3	Indel.LOH	6	6:40467682-40467682	AGGGA	frameshift_variant	HIGH	-	ENSCAFG00000029241	Transcript	ENSCAFT00000044073	protein_coding	1/1	-	-	-	149-150	149-150	50	G/GGX	gga/ggAGGGAa	-	-	1	-	-	-	-	-	-	-	-	-
G3	Indel.LOH	6	6:55351608-55351614	-	inframe_deletion	MODERATE	-	ENSCAFG00000032258	Transcript	ENSCAFT00000046879	protein_coding	1/2	-	-	-	709-714	112-117	38-39	PS/-	CCTTCC/-	-	-	-1	-	-	-	-	-	-	-	-	-
G3	Indel.LOH	7	7:14426348-14426348	AGGCGGTGC	inframe_insertion	MODERATE	KIAA1614	ENSCAFG00000012826	Transcript	ENSCAFT00000020339	protein_coding	5/9	-	-	-	1624-1625	1624-1625	542	E/EAVQ	gag/gAGGCGGTGCag	-	-	1	-	VGNC	-	-	-	-	-	-	-	ENSCAFT00000020339.4:c.1630_1631insTGCAGGCGG
G3	Indel.LOH	7	7:14426348-14426348	AGGCGGTGC	inframe_insertion	MODERATE	KIAA1614	ENSCAFG00000012826	Transcript	ENSCAFT00000048905	protein_coding	6/11	-	-	-	1894-1895	1684-1685	562	E/EAVQ	gag/gAGGCGGTGCag	-	-	1	-	VGNC	-	-	-	-	-	-	-	ENSCAFT00000048905.3:c.1690_1691insTGCAGGCGG
G3	Indel.Somatic	7	7:42960213-42960213	CCTCCATCCCGGAGCACCTCCACCCCGGGACC	frameshift_variant	HIGH	-	ENSCAFG00000030928	Transcript	ENSCAFT00000045855	protein_coding	2/2	-	-	-	197-198	197-198	66	H/HLHPGAPPPRDX	cac/caCCTCCATCCCGGAGCACCTCCACCCCGGGACCc	-	-	1	-	-	-	-	-	-	-	-	-
G3	Indel.LOH	7	7:42960259-42960259	C	frameshift_variant	HIGH	-	ENSCAFG00000030928	Transcript	ENSCAFT00000045855	protein_coding	2/2	-	-	-	243-244	243-244	81-82	-/X	-/C	-	-	1	-	-	-	-	-	-	-	-	-
G3	Indel.Somatic	7	7:44757831-44757837	-	inframe_deletion	MODERATE	LOXHD1	ENSCAFG00000017629	Transcript	ENSCAFT00000027958	protein_coding	13/36	-	-	-	2142-2147	2098-2103	700-701	ER/-	GAGAGG/-	rs853127792	-	1	-	VGNC	-	-	-	-	-	-	-	ENSCAFT00000027958.6:c.2919_2924del
G3	Indel.Somatic	7	7:44757831-44757837	-	inframe_deletion	MODERATE	LOXHD1	ENSCAFG00000017629	Transcript	ENSCAFT00000049867	protein_coding	13/35	-	-	-	2080-2085	2080-2085	694-695	ER/-	GAGAGG/-	rs853127792	-	1	-	VGNC	-	-	-	-	-	-	-	ENSCAFT00000049867.2:c.2919_2924del
G3	Indel.Somatic	9	9:16789187-16789187	A	frameshift_variant	HIGH	-	ENSCAFG00000032512	Transcript	ENSCAFT00000049735	protein_coding	1/1	-	-	-	125-126	125-126	42	R/RX	aga/agAa	-	-	1	-	-	-	-	-	-	-	-	-
G3	Indel.Somatic	9	9:40503953-40503954	-	frameshift_variant	HIGH	-	ENSCAFG00000031969	Transcript	ENSCAFT00000048749	protein_coding	1/1	-	-	-	1387	1387	463	P/X	Ccc/cc	-	-	1	-	-	-	-	-	-	-	-	-
G3	Indel.Somatic	9	9:5907980-5907983	-	inframe_deletion	MODERATE	-	ENSCAFG00000024792	Transcript	ENSCAFT00000038313	protein_coding	3/6	-	-	-	508-510	189-191	63-64	WK/W	tgGAAg/tgg	rs852788717	-	1	-	-	-	-	-	-	-	-	-	ENSCAFT00000038313.3:c.194_196del
G3	Indel.Somatic	9	9:5908133-5908133	GTG	inframe_insertion	MODERATE	-	ENSCAFG00000024792	Transcript	ENSCAFT00000038313	protein_coding	3/6	-	-	-	660-661	341-342	114	L/LW	ctg/ctGTGg	rs851118190	-	1	-	-	-	-	-	-	-	-	-	ENSCAFT00000038313.3:c.343_345dup
G3	Indel.Somatic	10	10:68162194-68162195	-	frameshift_variant	HIGH	-	ENSCAFG00000028749	Transcript	ENSCAFT00000047415	protein_coding	1/1	-	-	-	542	542	181	L/X	cTc/cc	rs853051466	-	1	-	-	-	-	-	-	-	-	-	ENSCAFT00000047415.2:c.262del
G3	Indel.LOH	11	11:68699669-68699675	-	inframe_deletion	MODERATE	WHRN	ENSCAFG00000003344	Transcript	ENSCAFT00000005356	protein_coding	1/13	-	-	-	323-328	117-122	39-41	GAG/G	ggCGCGGGg/ggg	-	-	-1	-	VGNC	-	-	-	-	-	-	-	ENSCAFT00000005356.5:c.117_122del
G3	Indel.LOH	12	12:13699491-13699495	-	splice_acceptor_variant,intron_variant,non_coding_transcript_variant	HIGH	-	ENSCAFG00000035362	Transcript	ENSCAFT00000053630	lincRNA	-	1/1	-	-	-	-	-	-	-	-	-	1	-	-	-	-	-	-	-	-	-
G3	Indel.Somatic	12	12:32443344-32443346	-	frameshift_variant	HIGH	-	ENSCAFG00000002548	Transcript	ENSCAFT00000004019	protein_coding	1/1	-	-	-	190-191	190-191	64	S/X	AGc/c	-	-	-1	-	-	-	-	-	-	-	-	-	ENSCAFT00000004019.1:c.190_191del
G3	Indel.LOH	12	12:71937263-71937270	-	frameshift_variant	HIGH	TSPYL1	ENSCAFG00000023729	Transcript	ENSCAFT00000036671	protein_coding	1/2	-	-	-	16-22	16-22	6-8	SGG/X	AGCGGGGgg/gg	-	-	-1	-	HGNC	HGNC:12382	-	-	-	-	-	-	ENSCAFT00000036671.3:c.16_22del
G3	Indel.LOH	13	13:61887908-61887917	-	inframe_deletion	MODERATE	COX18	ENSCAFG00000002962	Transcript	ENSCAFT00000004743	protein_coding	1/6	-	-	-	471-479	471-479	157-160	PGGP/P	ccAGGCGGCCCt/cct	-	-	-1	-	VGNC	-	-	-	-	-	-	-	ENSCAFT00000004743.3:c.471_479del
G3	Indel.Somatic	13	13:62670030-62670031	-	frameshift_variant	HIGH	-	ENSCAFG00000031464	Transcript	ENSCAFT00000043490	protein_coding	1/1	-	-	-	105	105	35	V/X	gtC/gt	-	-	1	-	-	-	-	-	-	-	-	-
G3	Indel.LOH	14	14:507367-507367	AGAAG	frameshift_variant	HIGH	-	ENSCAFG00000001138	Transcript	ENSCAFT00000001763	protein_coding	5/8	-	-	-	872-873	872-873	291	E/EEX	gaa/gaAGAAGa	-	-	1	-	-	-	-	-	-	-	-	-
G3	Indel.LOH	14	14:507371-507371	AG	frameshift_variant	HIGH	-	ENSCAFG00000001138	Transcript	ENSCAFT00000001763	protein_coding	5/8	-	-	-	876-877	876-877	292-293	-/X	-/AG	-	-	1	-	-	-	-	-	-	-	-	-
G3	Indel.Somatic	14	14:58969289-58969316	-	inframe_deletion	MODERATE	-	ENSCAFG00000023485	Transcript	ENSCAFT00000036128	protein_coding	1/1	-	-	-	180-206	180-206	60-69	PEAHRTGGPL/P	ccAGAGGCCCACAGGACAGGCGGTCCCCTa/cca	-	-	1	-	-	-	-	-	-	-	-	-
G3	Indel.LOH	15	15:2625669-2625670	-	frameshift_variant	HIGH	-	ENSCAFG00000032540	Transcript	ENSCAFT00000049110	protein_coding	2/2	-	-	-	429	210	70	K/X	aaG/aa	-	-	1	-	-	-	-	-	-	-	-	-
G3	Indel.LOH	15	15:2625669-2625670	-	frameshift_variant	HIGH	-	ENSCAFG00000032540	Transcript	ENSCAFT00000049289	protein_coding	3/3	-	-	-	465	246	82	K/X	aaG/aa	-	-	1	-	-	-	-	-	-	-	-	-
G3	Indel.LOH	16	16:93563-93567	-	frameshift_variant	HIGH	-	ENSCAFG00000031089	Transcript	ENSCAFT00000048823	protein_coding	1/1	-	-	-	802-805	802-805	268-269	GA/X	GGGGct/ct	-	-	-1	-	-	-	-	-	-	-	-	-
G3	Indel.Somatic	16	16:94117-94150	-	inframe_deletion	MODERATE	-	ENSCAFG00000031089	Transcript	ENSCAFT00000048823	protein_coding	1/1	-	-	-	219-251	219-251	73-84	EGEGEGTGRGRG/D	gaGGGGGAGGGGGAGGGGACGGGGCGGGGACGGGGc/gac	-	-	-1	-	-	-	-	-	-	-	-	-
G3	Indel.LOH	17	17:19530692-19530693	-	frameshift_variant	HIGH	DNMT3A	ENSCAFG00000004159	Transcript	ENSCAFT00000006680	protein_coding	4/22	-	-	-	474	474	158	K/X	aaA/aa	-	-	-1	-	VGNC	-	-	-	-	-	-	-
G3	Indel.Somatic	17	17:22910433-22910434	-	frameshift_variant	HIGH	C17H2orf71	ENSCAFG00000023626	Transcript	ENSCAFT00000036452	protein_coding	1/2	-	-	-	206	104	35	G/X	gGc/gc	-	-	-1	-	VGNC	-	-	-	-	-	-	-	ENSCAFT00000036452.3:c.104del
G3	Indel.LOH	17	17:31239965-31239965	AA	splice_donor_variant,non_coding_transcript_variant	HIGH	-	ENSCAFG00000006360	Transcript	ENSCAFT00000010274	pseudogene	-	-	-	-	522-523	-	-	-	-	-	-	-1	-	-	-	-	-	-	-	-	-
G3	Indel.LOH	17	17:44205071-44205071	T	frameshift_variant,splice_region_variant,intron_variant	HIGH	-	ENSCAFG00000008121	Transcript	ENSCAFT00000012925	protein_coding	-	-	-	-	852-853	852-853	284-285	-/X	-/T	rs853022647	-	1	-	-	-	-	-	-	-	-	-
G3	Indel.Somatic	17	17:53216419-53216421	-	frameshift_variant	HIGH	VANGL1	ENSCAFG00000009758	Transcript	ENSCAFT00000035308	protein_coding	7/8	-	-	-	1668-1669	1146-1147	382-383	KA/NX	aaAGcc/aacc	-	-	1	-	VGNC	-	-	-	-	-	-	-	ENSCAFT00000035308.3:c.1146_1147del
G3	Indel.LOH	17	17:90646-90646	CGGGGG	inframe_insertion	MODERATE	-	ENSCAFG00000025168	Transcript	ENSCAFT00000039016	protein_coding	1/1	-	-	-	247-248	247-248	83	G/APG	ggg/gCCCCCGgg	-	-	-1	-	-	-	-	-	-	-	-	-	ENSCAFT00000039016.2:c.242_247dup
G3	Indel.Somatic	18	18:45881218-45881251	-	inframe_deletion	MODERATE	-	ENSCAFG00000030941	Transcript	ENSCAFT00000045003	protein_coding	1/1	-	-	-	335-367	335-367	112-123	SQSSCCCKPCCC/C	tCCCAGTCCAGCTGCTGCTGCAAACCCTGCTGCTgt/tgt	-	-	-1	-	-	-	-	-	-	-	-	-
G3	Indel.LOH	18	18:49540035-49540038	-	inframe_deletion	MODERATE	-	ENSCAFG00000029209	Transcript	ENSCAFT00000047695	protein_coding	4/4	-	-	-	572-574	165-167	55-56	KR/K	aaAAGa/aaa	-	-	1	-	-	-	-	-	-	-	-	-
G3	Indel.LOH	19	19:6283938-6283940	-	frameshift_variant	HIGH	-	ENSCAFG00000030512	Transcript	ENSCAFT00000045518	protein_coding	2/2	-	-	-	206-207	206-207	69	L/X	cTT/c	-	-	1	-	-	-	-	-	-	-	-	-
G3	Indel.LOH	19	19:6283946-6283947	-	frameshift_variant	HIGH	-	ENSCAFG00000030512	Transcript	ENSCAFT00000045518	protein_coding	2/2	-	-	-	214	214	72	F/X	Ttt/tt	-	-	1	-	-	-	-	-	-	-	-	-
G3	Indel.LOH	20	20:12472686-12472708	-	splice_donor_variant,coding_sequence_variant,intron_variant	HIGH	EDEM1	ENSCAFG00000005608	Transcript	ENSCAFT00000009032	protein_coding	1/13	1/12	-	-	80-?	80-?	27-?	-	-	-	-	-1	-	VGNC	-	-	-	-	-	-	-
G3	Indel.Somatic	20	20:37566285-37566291	-	inframe_deletion	MODERATE	ALAS1	ENSCAFG00000009881	Transcript	ENSCAFT00000015704	protein_coding	1/11	-	-	-	148-153	132-137	44-46	PPP/P	ccGCCGCCt/cct	-	-	-1	-	VGNC	-	-	-	-	-	-	-	ENSCAFT00000015704.4:c.348_353del
G3	Indel.LOH	21	21:44256224-44256230	-	inframe_deletion	MODERATE	FANCF	ENSCAFG00000029498	Transcript	ENSCAFT00000047781	protein_coding	1/3	-	-	-	5-10	5-10	2-4	GSA/A	gGAAGCGcg/gcg	-	-	-1	-	VGNC	-	-	-	-	-	-	-	ENSCAFT00000047781.2:c.389_394del
G3	Indel.LOH	21	21:47390077-47390077	A	stop_gained,frameshift_variant,splice_region_variant	HIGH	ANO3	ENSCAFG00000010152	Transcript	ENSCAFT00000016128	protein_coding	22/29	-	-	-	2562-2563	1972-1973	658	Y/*	tac/tAac	rs853126437	-	1	-	VGNC	-	-	-	-	-	-	-	ENSCAFT00000016128.4:c.1971+1dup
G3	Indel.LOH	23	23:47249005-47249044	-	inframe_deletion	MODERATE	-	ENSCAFG00000028903	Transcript	ENSCAFT00000046307	protein_coding	2/2	-	-	-	376-414	376-414	126-138	KGALGVRAGEGAG/-	AAGGGCGCGCTCGGGGTCCGCGCGGGAGAGGGTGCGGGA/-	-	-	-1	-	-	-	-	-	-	-	-	-
G3	Indel.LOH	23	23:50653961-50653990	-	frameshift_variant	HIGH	-	ENSCAFG00000032528	Transcript	ENSCAFT00000045618	protein_coding	1/2	-	-	-	55-83	55-83	19-28	RSARRPAAPP/X	CGCAGTGCCCGACGCCCCGCAGCGCCCCCg/g	-	-	-1	-	-	-	-	-	-	-	-	-
G3	Indel.LOH	24	24:11658557-11658557	CGCCCCCCCCG	frameshift_variant	HIGH	-	ENSCAFG00000032703	Transcript	ENSCAFT00000044721	protein_coding	1/2	-	-	-	1543-1544	1010-1011	337	G/GGGGX	ggg/ggCGGGGGGGGCGg	-	-	-1	-	-	-	-	-	-	-	-	-
G3	Indel.Somatic	24	24:38175127-38175156	-	frameshift_variant	HIGH	-	ENSCAFG00000029556	Transcript	ENSCAFT00000048309	protein_coding	1/1	-	-	-	171-199	171-199	57-67	SFFLSFFLSFF/SX	tcTTTCTTTCTTTCTTTCTTTCTTTCTTTCTtt/tctt	-	-	1	-	-	-	-	-	-	-	-	-
G3	Indel.Somatic	26	26:11512056-11512056	GCTGCACATTCT	inframe_insertion	MODERATE	-	ENSCAFG00000030864	Transcript	ENSCAFT00000046871	protein_coding	1/1	-	-	-	682-683	682-683	228	R/QNVQR	cgg/cAGAATGTGCAGCgg	-	-	-1	-	-	-	-	-	-	-	-	-
G3	Indel.LOH	26	26:18977114-18977114	CGC	inframe_insertion	MODERATE	-	ENSCAFG00000030511	Transcript	ENSCAFT00000046275	protein_coding	1/1	-	-	-	589-590	589-590	197	A/GA	gct/gGCGct	-	-	-1	-	-	-	-	-	-	-	-	-
G3	Indel.Somatic	26	26:22732974-22732998	-	inframe_deletion	MODERATE	NEFH	ENSCAFG00000012243	Transcript	ENSCAFT00000019446	protein_coding	4/4	-	-	-	2851-2874	1886-1909	629-637	KAKSPVKEE/K	aAGGCCAAGTCCCCAGTGAAGGAGGag/aag	rs852544148	-	1	-	VGNC	-	-	-	-	-	-	-	ENSCAFT00000019446.5:c.1901_1924del
G3	Indel.Somatic	26	26:22732974-22732998	-	inframe_deletion	MODERATE	NEFH	ENSCAFG00000012243	Transcript	ENSCAFT00000035381	protein_coding	4/6	-	-	-	1886-1909	1886-1909	629-637	KAKSPVKEE/K	aAGGCCAAGTCCCCAGTGAAGGAGGag/aag	rs852544148	-	1	-	VGNC	-	-	-	-	-	-	-
G3	Indel.Somatic	26	26:22732974-22732998	-	splice_donor_variant,coding_sequence_variant,intron_variant	HIGH	NEFH	ENSCAFG00000012243	Transcript	ENSCAFT00000048856	protein_coding	4/5	4/4	-	-	1886-?	1886-?	629-?	-	-	rs852544148	-	1	-	VGNC	-	-	-	-	-	-	-
G3	Indel.Somatic	26	26:22732974-22732998	-	inframe_deletion	MODERATE	NEFH	ENSCAFG00000012243	Transcript	ENSCAFT00000050181	protein_coding	5/8	-	-	-	1703-1726	1703-1726	568-576	KAKSPVKEE/K	aAGGCCAAGTCCCCAGTGAAGGAGGag/aag	rs852544148	-	1	-	VGNC	-	-	-	-	-	-	-
G3	Indel.LOH	26	26:27499678-27499682	-	frameshift_variant	HIGH	-	ENSCAFG00000031273	Transcript	ENSCAFT00000023586	protein_coding	2/2	-	-	-	462-465	305-308	102-103	AD/X	gCTGAc/gc	rs851011185	-	1	-	-	-	-	-	-	-	-	-	ENSCAFT00000023586.4:c.307_310del
G3	Indel.Somatic	26	26:37793528-37793528	CGGGGC	inframe_insertion	MODERATE	-	ENSCAFG00000029370	Transcript	ENSCAFT00000044307	protein_coding	1/1	-	-	-	695-696	695-696	232	D/DGA	gac/gaCGGGGCc	-	-	1	-	-	-	-	-	-	-	-	-
G3	Indel.LOH	26	26:37793529-37793559	-	inframe_deletion	MODERATE	-	ENSCAFG00000029370	Transcript	ENSCAFT00000044307	protein_coding	1/1	-	-	-	697-726	697-726	233-242	GLGDGTGDGT/-	GGGCTCGGGGACGGGACTGGGGACGGGACT/-	-	-	1	-	-	-	-	-	-	-	-	-
G3	Indel.Somatic	26	26:37826343-37826343	G	frameshift_variant	HIGH	-	ENSCAFG00000031699	Transcript	ENSCAFT00000048308	protein_coding	1/1	-	-	-	919-920	919-920	307	R/RX	cgg/cGgg	-	-	1	-	-	-	-	-	-	-	-	-
G3	Indel.LOH	27	27:5097837-5097837	ACTGTAG	frameshift_variant	HIGH	KCNH3	ENSCAFG00000008571	Transcript	ENSCAFT00000013602	protein_coding	5/15	-	-	-	771-772	657-658	219-220	-/LQX	-/CTACAGT	-	-	-1	-	VGNC	-	-	-	-	-	-	-	ENSCAFT00000013602.4:c.699_700insCTACAGT
G3	Indel.LOH	27	27:5097837-5097837	ACTGTAG	frameshift_variant	HIGH	KCNH3	ENSCAFG00000008571	Transcript	ENSCAFT00000049004	protein_coding	5/10	-	-	-	771-772	555-556	185-186	-/LQX	-/CTACAGT	-	-	-1	-	VGNC	-	-	-	-	-	-	-	ENSCAFT00000049004.3:c.699_700insCTACAGT
G3	Indel.Somatic	28	28:10853503-10853566	-	splice_acceptor_variant,coding_sequence_variant,intron_variant	HIGH	C10orf62	ENSCAFG00000025366	Transcript	ENSCAFT00000039383	protein_coding	2/2	1/1	-	-	?-629	?-629	?-210	-	-	-	-	1	-	HGNC	HGNC:23294	-	-	-	-	-	-	ENSCAFT00000039383.4:c.580-21_621del
G3	Indel.LOH	28	28:31691424-31691478	-	inframe_deletion	MODERATE	-	ENSCAFG00000030131	Transcript	ENSCAFT00000049304	protein_coding	1/1	-	-	-	46-99	46-99	16-33	ARHTCRGTCNRSRGTCRG/-	GCCCGACACACCTGCAGGGGTACCTGTAACAGGAGCAGGGGTACCTGCAGGGGA/-	-	-	-1	-	-	-	-	-	-	-	-	-
G3	Indel.Somatic	29	29:16711889-16711934	-	splice_acceptor_variant,coding_sequence_variant,3_prime_UTR_variant,intron_variant	HIGH	CSPP1	ENSCAFG00000007411	Transcript	ENSCAFT00000011878	protein_coding	32/32	31/31	-	-	?-3975	-	-	-	-	-	-	1	-	VGNC	-	-	-	-	-	-	-
G3	Indel.Somatic	32	32:404522-404529	-	frameshift_variant	HIGH	-	ENSCAFG00000032588	Transcript	ENSCAFT00000049866	protein_coding	1/1	-	-	-	502-508	502-508	168-170	KKE/X	AAGAAAGaa/aa	-	-	1	-	-	-	-	-	-	-	-	-
G3	Indel.LOH	33	33:26426-26428	-	frameshift_variant	HIGH	-	ENSCAFG00000009973	Transcript	ENSCAFT00000015865	protein_coding	4/5	-	-	-	867-868	867-868	289-290	VK/VX	gtAAag/gtag	-	-	1	-	-	-	-	-	-	-	-	-	ENSCAFT00000015865.3:c.280_281del
G3	Indel.Somatic	35	35:25701280-25701280	C	frameshift_variant	HIGH	-	ENSCAFG00000030230	Transcript	ENSCAFT00000045609	protein_coding	1/2	-	-	-	529-530	529-530	177	S/SX	tcc/tCcc	-	-	1	-	-	-	-	-	-	-	-	-
G3	Indel.LOH	38	38:1747783-1747792	-	inframe_deletion	MODERATE	TMCC2	ENSCAFG00000010030	Transcript	ENSCAFT00000015952	protein_coding	2/5	-	-	-	800-808	343-351	115-117	QQQ/-	CAGCAGCAG/-	rs851329311	-	1	-	VGNC	-	-	-	-	-	-	-	ENSCAFT00000015952.5:c.373_381del
G3	Indel.LOH	38	38:22224717-22224724	-	frameshift_variant	HIGH	-	ENSCAFG00000029169	Transcript	ENSCAFT00000043961	protein_coding	1/1	-	-	-	411-417	411-417	137-139	PAA/X	ccCGCCGCC/cc	-	-	-1	-	-	-	-	-	-	-	-	-
G3	Indel.LOH	X	X:122914364-122914364	GGC	inframe_insertion	MODERATE	-	ENSCAFG00000023407	Transcript	ENSCAFT00000035969	protein_coding	1/2	-	-	-	3-4	3-4	1-2	-/G	-/GGC	-	-	1	-	-	-	-	-	-	-	-	-	ENSCAFT00000035969.3:c.80_82dup
G3	Indel.Somatic	X	X:43109757-43109758	-	frameshift_variant	HIGH	DGKK	ENSCAFG00000016018	Transcript	ENSCAFT00000025414	protein_coding	8/28	-	-	-	702	702	234	G/X	ggG/gg	rs852072182	-	-1	-	VGNC	-	-	-	-	-	-	-	ENSCAFT00000025414.4:c.813del
P1	Indel.Somatic	1	1:114475221-114475222	-	frameshift_variant	HIGH	RYR1	ENSCAFG00000005896	Transcript	ENSCAFT00000009509	protein_coding	92/107	-	-	-	13295	13295	4432	D/X	gAc/gc	-	-	-1	-	VGNC	-	-	-	-	-	-	-	ENSCAFT00000009509.4:c.13235del
P1	Indel.Somatic	1	1:114475221-114475222	-	frameshift_variant	HIGH	RYR1	ENSCAFG00000005896	Transcript	ENSCAFT00000048904	protein_coding	69/84	-	-	-	10451	10451	3484	D/X	gAc/gc	-	-	-1	-	VGNC	-	-	-	-	-	-	-	ENSCAFT00000048904.3:c.13220del
P1	Indel.LOH	1	1:41593573-41593587	-	frameshift_variant	HIGH	-	ENSCAFG00000029168	Transcript	ENSCAFT00000049124	protein_coding	3/3	-	-	-	163-176	163-176	55-59	KKKKK/X	AAAAAGAAAAAGAAa/a	-	-	1	-	-	-	-	-	-	-	-	-
P1	Indel.LOH	1	1:45169147-45169147	AAAAC	frameshift_variant	HIGH	NOX3	ENSCAFG00000000589	Transcript	ENSCAFT00000000923	protein_coding	7/13	-	-	-	677-678	677-678	226	L/LFX	tta/ttGTTTTa	rs853028524	-	-1	-	VGNC	-	-	-	-	-	-	-
P1	Indel.Somatic	1	1:82062199-82062199	G	frameshift_variant	HIGH	-	ENSCAFG00000030179	Transcript	ENSCAFT00000049723	protein_coding	1/4	-	-	-	1045-1046	230-231	77	A/AX	gcg/gcGg	-	-	1	-	-	-	-	-	-	-	-	-	ENSCAFT00000049723.3:c.483dup
P1	Indel.Somatic	2	2:73738989-73738990	-	frameshift_variant	HIGH	SH3BGRL3	ENSCAFG00000012567	Transcript	ENSCAFT00000019956	protein_coding	1/5	-	-	-	4	4	2	R/X	Agg/gg	-	-	-1	-	HGNC	HGNC:15568	-	-	-	-	-	-
P1	Indel.Somatic	3	3:13960829-13960831	-	frameshift_variant	HIGH	-	ENSCAFG00000030999	Transcript	ENSCAFT00000047095	protein_coding	1/1	-	-	-	856-857	856-857	286	R/X	CGg/g	-	-	1	-	-	-	-	-	-	-	-	-
P1	Indel.Somatic	3	3:3232844-3232845	-	frameshift_variant	HIGH	-	ENSCAFG00000032321	Transcript	ENSCAFT00000044253	protein_coding	1/2	-	-	-	687	238	80	S/X	Tct/ct	-	-	-1	-	-	-	-	-	-	-	-	-
P1	Indel.LOH	4	4:65159988-65159988	CCGCAGCCC	inframe_insertion,splice_region_variant	MODERATE	HCN1	ENSCAFG00000018508	Transcript	ENSCAFT00000029386	protein_coding	8/9	-	-	-	2250-2251	2250-2251	750-751	-/PQP	-/CCGCAGCCC	-	-	1	-	VGNC	-	-	-	-	-	-	-	ENSCAFT00000029386.5:c.2258_2259insCCCGCAGCC
P1	Indel.LOH	4	4:65159988-65159988	CCGCAGCCC	inframe_insertion	MODERATE	HCN1	ENSCAFG00000018508	Transcript	ENSCAFT00000049582	protein_coding	8/8	-	-	-	2886-2887	2250-2251	750-751	-/PQP	-/CCGCAGCCC	-	-	1	-	VGNC	-	-	-	-	-	-	-
P1	Indel.LOH	4	4:65536829-65536829	GCGGGC	inframe_insertion	MODERATE	MRPS30	ENSCAFG00000018516	Transcript	ENSCAFT00000029402	protein_coding	1/5	-	-	-	386-387	386-387	129	A/APA	gcc/gcGCCCGCc	-	-	-1	-	VGNC	-	-	-	-	-	-	-	ENSCAFT00000029402.4:c.381_386dup
P1	Indel.Somatic	5	5:31859396-31859402	-	inframe_deletion	MODERATE	PELP1	ENSCAFG00000015914	Transcript	ENSCAFT00000025217	protein_coding	17/18	-	-	-	2847-2852	2847-2852	949-951	EDF/D	gaAGATTTt/gat	-	-	1	-	VGNC	-	-	-	-	-	-	-	ENSCAFT00000025217.4:c.2700_2705del
P1	Indel.Somatic	5	5:932597-932598	-	frameshift_variant	HIGH	-	ENSCAFG00000031837	Transcript	ENSCAFT00000048530	protein_coding	1/1	-	-	-	981	981	327	G/X	ggG/gg	-	-	-1	-	-	-	-	-	-	-	-	-
P1	Indel.LOH	6	6:69866893-69866896	-	inframe_deletion	MODERATE	ST6GALNAC5	ENSCAFG00000020386	Transcript	ENSCAFT00000032464	protein_coding	1/4	-	-	-	136-138	136-138	46	Q/-	CAG/-	rs850967165	-	-1	-	VGNC	-	-	-	-	-	-	-	ENSCAFT00000032464.4:c.148_150del
P1	Indel.LOH	7	7:42960213-42960213	CCTCCATCCCGGAGCACCTCCACCCCGGGACC	frameshift_variant	HIGH	-	ENSCAFG00000030928	Transcript	ENSCAFT00000045855	protein_coding	2/2	-	-	-	197-198	197-198	66	H/HLHPGAPPPRDX	cac/caCCTCCATCCCGGAGCACCTCCACCCCGGGACCc	-	-	1	-	-	-	-	-	-	-	-	-
P1	Indel.Somatic	7	7:42960259-42960259	C	frameshift_variant	HIGH	-	ENSCAFG00000030928	Transcript	ENSCAFT00000045855	protein_coding	2/2	-	-	-	243-244	243-244	81-82	-/X	-/C	-	-	1	-	-	-	-	-	-	-	-	-
P1	Indel.Somatic	7	7:42960290-42960291	-	frameshift_variant	HIGH	-	ENSCAFG00000030928	Transcript	ENSCAFT00000045855	protein_coding	2/2	-	-	-	275	275	92	A/X	gCc/gc	-	-	1	-	-	-	-	-	-	-	-	-
P1	Indel.LOH	7	7:75679750-75679751	-	frameshift_variant	HIGH	-	ENSCAFG00000031565	Transcript	ENSCAFT00000043855	protein_coding	1/2	-	-	-	288	288	96	H/X	caC/ca	-	-	-1	-	-	-	-	-	-	-	-	-
P1	Indel.Somatic	8	8:10493110-10493110	A	frameshift_variant	HIGH	-	ENSCAFG00000030178	Transcript	ENSCAFT00000045720	protein_coding	1/1	-	-	-	770-771	770-771	257	G/GX	ggg/ggAg	-	-	1	-	-	-	-	-	-	-	-	-
P1	Indel.LOH	8	8:28914074-28914074	CCGCC	frameshift_variant	HIGH	-	ENSCAFG00000029061	Transcript	ENSCAFT00000043788	protein_coding	1/3	-	-	-	460-461	458-459	153	L/LRX	ctc/ctCCGCCc	-	-	1	-	-	-	-	-	-	-	-	-
P1	Indel.Somatic	9	9:24812827-24812827	CCT	inframe_insertion	MODERATE	HOXB3	ENSCAFG00000028513	Transcript	ENSCAFT00000042839	protein_coding	2/3	-	-	-	488-489	488-489	163	G/GG	ggc/ggAGGc	-	-	-1	-	VGNC	-	-	-	-	-	-	-	ENSCAFT00000042839.2:c.488_489insAGG
P1	Indel.Somatic	9	9:58929469-58929469	TC	frameshift_variant	HIGH	-	ENSCAFG00000030642	Transcript	ENSCAFT00000043800	protein_coding	3/3	-	-	-	256-257	256-257	86	K/RX	aag/aGAag	-	-	-1	-	-	-	-	-	-	-	-	-
P1	Indel.LOH	10	10:17023385-17023385	C	frameshift_variant	HIGH	TUBGCP6	ENSCAFG00000000689	Transcript	ENSCAFT00000001073	protein_coding	19/25	-	-	-	4171-4172	4171-4172	1391	A/AX	gcg/gCcg	-	-	1	-	VGNC	-	-	-	-	-	-	-	ENSCAFT00000001073.4:c.4076dup
P1	Indel.LOH	10	10:26582959-26582965	-	inframe_deletion	MODERATE	BAIAP2L2	ENSCAFG00000001427	Transcript	ENSCAFT00000002222	protein_coding	12/16	-	-	-	964-969	964-969	322-323	GG/-	GGCGGC/-	rs853028197	-	1	-	VGNC	-	-	-	-	-	-	-
P1	Indel.LOH	10	10:64206803-64206809	-	inframe_deletion	MODERATE	-	ENSCAFG00000023129	Transcript	ENSCAFT00000035374	protein_coding	2/2	-	-	-	109-114	109-114	37-38	TS/-	ACGTCG/-	-	-	-1	-	-	-	-	-	-	-	-	-
P1	Indel.LOH	13	13:62670220-62670221	-	frameshift_variant	HIGH	-	ENSCAFG00000031464	Transcript	ENSCAFT00000043490	protein_coding	1/1	-	-	-	295	295	99	P/X	Ccc/cc	-	-	1	-	-	-	-	-	-	-	-	-
P1	Indel.LOH	14	14:14032479-14032482	-	inframe_deletion	MODERATE	ADAM22	ENSCAFG00000001852	Transcript	ENSCAFT00000047142	protein_coding	1/32	-	-	-	6-8	6-8	2-3	QA/Q	caGGCg/cag	-	-	1	-	VGNC	-	-	-	-	-	-	-	ENSCAFT00000047142.3:c.24_26del
P1	Indel.LOH	14	14:18121396-18121399	-	inframe_deletion	MODERATE	RBM48	ENSCAFG00000001980	Transcript	ENSCAFT00000003136	protein_coding	4/5	-	-	-	853-855	797-799	266-267	TS/T	aCTTct/act	rs850548548	-	1	-	VGNC	-	-	-	-	-	-	-	ENSCAFT00000003136.4:c.801_803del
P1	Indel.LOH	14	14:19665541-19665544	-	inframe_deletion	MODERATE	-	ENSCAFG00000003769	Transcript	ENSCAFT00000006060	protein_coding	2/2	-	-	-	505-507	505-507	169	P/-	CCC/-	rs852183254	-	1	-	-	-	-	-	-	-	-	-
P1	Indel.LOH	14	14:38629742-38629743	-	frameshift_variant	HIGH	-	ENSCAFG00000029320	Transcript	ENSCAFT00000044212	protein_coding	1/1	-	-	-	813	813	271	P/X	ccC/cc	-	-	-1	-	-	-	-	-	-	-	-	-
P1	Indel.LOH	14	14:38629826-38629828	-	frameshift_variant	HIGH	-	ENSCAFG00000029320	Transcript	ENSCAFT00000044212	protein_coding	1/1	-	-	-	728-729	728-729	243	A/X	gCG/g	-	-	-1	-	-	-	-	-	-	-	-	-
P1	Indel.LOH	14	14:56585850-56585856	-	inframe_deletion	MODERATE	CTTNBP2	ENSCAFG00000003432	Transcript	ENSCAFT00000005522	protein_coding	3/21	-	-	-	1083-1088	1083-1088	361-363	APA/A	gcGCCCGCc/gcc	-	-	-1	-	VGNC	-	-	-	-	-	-	-	ENSCAFT00000005522.4:c.1575_1580del
P1	Indel.LOH	14	14:56585850-56585856	-	inframe_deletion	MODERATE	CTTNBP2	ENSCAFG00000003432	Transcript	ENSCAFT00000047010	protein_coding	3/22	-	-	-	1533-1538	1488-1493	496-498	APA/A	gcGCCCGCc/gcc	-	-	-1	-	VGNC	-	-	-	-	-	-	-	ENSCAFT00000047010.3:c.1575_1580del
P1	Indel.Somatic	15	15:2625615-2625616	-	frameshift_variant	HIGH	-	ENSCAFG00000032540	Transcript	ENSCAFT00000049110	protein_coding	2/2	-	-	-	375	156	52	K/X	aaG/aa	-	-	1	-	-	-	-	-	-	-	-	-
P1	Indel.Somatic	15	15:2625615-2625616	-	frameshift_variant	HIGH	-	ENSCAFG00000032540	Transcript	ENSCAFT00000049289	protein_coding	3/3	-	-	-	411	192	64	K/X	aaG/aa	-	-	1	-	-	-	-	-	-	-	-	-
P1	Indel.LOH	17	17:19863775-19863776	-	frameshift_variant	HIGH	DTNB	ENSCAFG00000004223	Transcript	ENSCAFT00000006790	protein_coding	1/18	-	-	-	420	420	140	R/X	cgT/cg	-	-	-1	-	HGNC	HGNC:3058	-	-	-	-	-	-
P1	Indel.LOH	17	17:37729596-37729602	-	inframe_deletion	MODERATE	-	ENSCAFG00000007370	Transcript	ENSCAFT00000011797	protein_coding	2/2	-	-	-	246-251	246-251	82-84	FSS/F	ttCAGCAGc/ttc	-	-	1	-	-	-	-	-	-	-	-	-	ENSCAFT00000011797.4:c.231_236del
P1	Indel.LOH	17	17:37729607-37729607	A	frameshift_variant	HIGH	-	ENSCAFG00000007370	Transcript	ENSCAFT00000011797	protein_coding	2/2	-	-	-	256-257	256-257	86	G/EX	gga/gAga	rs852027546	-	1	-	-	-	-	-	-	-	-	-	ENSCAFT00000011797.4:c.238_239insA
P1	Indel.LOH	17	17:9037933-9037933	C	frameshift_variant	HIGH	-	ENSCAFG00000029963	Transcript	ENSCAFT00000047663	protein_coding	3/3	-	-	-	196-197	196-197	66	S/SX	tct/tCct	-	-	1	-	-	-	-	-	-	-	-	-
P1	Indel.LOH	18	18:49324967-49324967	C	frameshift_variant	HIGH	-	ENSCAFG00000029209	Transcript	ENSCAFT00000047695	protein_coding	1/4	-	-	-	471-472	64-65	22	K/TX	aag/aCag	-	-	1	-	-	-	-	-	-	-	-	-
P1	Indel.Somatic	18	18:54509118-54509118	C	frameshift_variant	HIGH	-	ENSCAFG00000030157	Transcript	ENSCAFT00000049710	protein_coding	1/1	-	-	-	244-245	244-245	82	A/GX	gcc/gGcc	-	-	-1	-	-	-	-	-	-	-	-	-
P1	Indel.LOH	19	19:51907239-51907241	-	frameshift_variant	HIGH	-	ENSCAFG00000031551	Transcript	ENSCAFT00000043479	protein_coding	2/4	-	-	-	191-192	191-192	64	A/X	gCC/g	-	-	1	-	-	-	-	-	-	-	-	-
P1	Indel.LOH	20	20:18857742-18857742	GCGGCA	inframe_insertion	MODERATE	PDZRN3	ENSCAFG00000030541	Transcript	ENSCAFT00000043571	protein_coding	11/11	-	-	-	1438-1439	1438-1439	480	G/GGS	ggc/gGCGGCAgc	rs852932872	-	1	-	HGNC	HGNC:17704	-	-	-	-	-	-	ENSCAFT00000043571.2:c.1246_1251dup
P1	Indel.LOH	20	20:55172220-55172220	CCGCCCCCGCCG	inframe_insertion	MODERATE	SEMA6B	ENSCAFG00000019014	Transcript	ENSCAFT00000030197	protein_coding	17/17	-	-	-	2053-2054	2053-2054	685	P/PAPAA	ccc/cCCGCCCCCGCCGcc	-	-	1	-	VGNC	-	-	-	-	-	-	-	ENSCAFT00000030197.4:c.1998_1999insCCCGCCGCCGCC
P1	Indel.LOH	20	20:57743492-57743492	GGG	inframe_insertion	MODERATE	-	ENSCAFG00000032465	Transcript	ENSCAFT00000047485	protein_coding	1/2	-	-	-	376-377	376-377	126	R/RG	cgg/cGGGgg	-	-	1	-	-	-	-	-	-	-	-	-	ENSCAFT00000047485.2:c.2126_2128dup
P1	Indel.Somatic	21	21:47706910-47706962	-	frameshift_variant	HIGH	-	ENSCAFG00000028742	Transcript	ENSCAFT00000043206	protein_coding	1/1	-	-	-	300-351	300-351	100-117	PSLPASPFPLPPSLPPLP/X	ccCTCCCTTCCCGCTTCCCCCTTCCCCCTTCCTCCTTCCCTTCCCCCCCTTCCC/cc	-	-	-1	-	-	-	-	-	-	-	-	-
P1	Indel.LOH	22	22:38784361-38784361	T	frameshift_variant	HIGH	-	ENSCAFG00000005292	Transcript	ENSCAFT00000008530	protein_coding	1/1	-	-	-	565-566	565-566	189	I/IX	att/aTtt	rs852830764	-	1	-	-	-	-	-	-	-	-	-	ENSCAFT00000008530.3:c.567dup
P1	Indel.LOH	23	23:50150626-50150626	TTT	inframe_insertion	MODERATE	-	ENSCAFG00000029908	Transcript	ENSCAFT00000047211	protein_coding	1/1	-	-	-	1284-1285	1284-1285	428-429	-/F	-/TTT	-	-	1	-	-	-	-	-	-	-	-	-
P1	Indel.LOH	24	24:32910785-32910786	-	frameshift_variant	HIGH	WFDC10A	ENSCAFG00000030127	Transcript	ENSCAFT00000044834	protein_coding	1/2	-	-	-	75	13	5	A/X	Gct/ct	-	-	-1	-	HGNC	HGNC:16139	-	-	-	-	-	-	ENSCAFT00000044834.1:c.13del
P1	Indel.LOH	25	25:14170650-14170650	A	splice_acceptor_variant,frameshift_variant	HIGH	-	ENSCAFG00000024806	Transcript	ENSCAFT00000027629	protein_coding	-	-	-	-	489-490	489-490	163-164	-/X	-/A	rs853028527	-	1	-	-	-	-	-	-	-	-	-
P1	Indel.LOH	25	25:20942744-20942745	-	splice_donor_variant	HIGH	-	ENSCAFG00000029275	Transcript	ENSCAFT00000049793	protein_coding	-	1/1	-	-	-	-	-	-	-	-	-	1	-	-	-	-	-	-	-	-	-
P1	Indel.LOH	26	26:22732974-22732998	-	inframe_deletion	MODERATE	NEFH	ENSCAFG00000012243	Transcript	ENSCAFT00000019446	protein_coding	4/4	-	-	-	2851-2874	1886-1909	629-637	KAKSPVKEE/K	aAGGCCAAGTCCCCAGTGAAGGAGGag/aag	rs852544148	-	1	-	VGNC	-	-	-	-	-	-	-	ENSCAFT00000019446.5:c.1901_1924del
P1	Indel.LOH	26	26:22732974-22732998	-	inframe_deletion	MODERATE	NEFH	ENSCAFG00000012243	Transcript	ENSCAFT00000035381	protein_coding	4/6	-	-	-	1886-1909	1886-1909	629-637	KAKSPVKEE/K	aAGGCCAAGTCCCCAGTGAAGGAGGag/aag	rs852544148	-	1	-	VGNC	-	-	-	-	-	-	-
P1	Indel.LOH	26	26:22732974-22732998	-	splice_donor_variant,coding_sequence_variant,intron_variant	HIGH	NEFH	ENSCAFG00000012243	Transcript	ENSCAFT00000048856	protein_coding	4/5	4/4	-	-	1886-?	1886-?	629-?	-	-	rs852544148	-	1	-	VGNC	-	-	-	-	-	-	-
P1	Indel.LOH	26	26:22732974-22732998	-	inframe_deletion	MODERATE	NEFH	ENSCAFG00000012243	Transcript	ENSCAFT00000050181	protein_coding	5/8	-	-	-	1703-1726	1703-1726	568-576	KAKSPVKEE/K	aAGGCCAAGTCCCCAGTGAAGGAGGag/aag	rs852544148	-	1	-	VGNC	-	-	-	-	-	-	-
P1	Indel.LOH	26	26:9069232-9069236	-	frameshift_variant	HIGH	SH2B3	ENSCAFG00000008601	Transcript	ENSCAFT00000013635	protein_coding	6/8	-	-	-	1773-1776	1229-1232	410-411	RQ/X	cGGCAg/cg	-	-	1	-	VGNC	-	-	-	-	-	-	-	ENSCAFT00000013635.5:c.1233_1236del
P1	Indel.LOH	27	27:2345999-2345999	GCAGCAGCGGAGGCTACCAGAGTG	inframe_insertion	MODERATE	KRT76	ENSCAFG00000007208	Transcript	ENSCAFT00000039433	protein_coding	10/10	-	-	-	1684-1685	1684-1685	562	S/SSSGGYQSG	agc/aGCAGCAGCGGAGGCTACCAGAGTGgc	-	-	1	-	EntrezGene	-	-	-	-	-	-	-
P1	Indel.LOH	27	27:38367848-38367878	-	inframe_deletion	MODERATE	ZNF384	ENSCAFG00000014740	Transcript	ENSCAFT00000023420	protein_coding	11/11	-	-	-	1858-1887	1456-1485	486-495	AQAQAQAQAQ/-	GCCCAGGCCCAGGCCCAGGCCCAGGCTCAA/-	-	-	1	-	VGNC	-	-	-	-	-	-	-	ENSCAFT00000023420.4:c.1458_1487del
P1	Indel.LOH	28	28:13514398-13514399	-	splice_acceptor_variant	HIGH	PAX2	ENSCAFG00000009709	Transcript	ENSCAFT00000003701	protein_coding	-	9/11	-	-	-	-	-	-	-	rs851933241	-	1	-	VGNC	-	-	-	-	-	-	-
P1	Indel.LOH	28	28:25816770-25816770	CGGCGGCGGCGG	inframe_insertion	MODERATE	ATRNL1	ENSCAFG00000011725	Transcript	ENSCAFT00000018678	protein_coding	1/29	-	-	-	471-472	74-75	25	V/VGGGG	gtc/gtCGGCGGCGGCGGc	-	-	1	-	VGNC	-	-	-	-	-	-	-	ENSCAFT00000018678.5:c.75_76insGGCGGCGGCGGC
P1	Indel.LOH	28	28:33808713-33808713	CGCCGCCGC	inframe_insertion	MODERATE	NKX1-2	ENSCAFG00000031292	Transcript	ENSCAFT00000044859	protein_coding	2/2	-	-	-	926-927	760-761	254	A/GGGA	gcg/gGCGGCGGCGcg	-	-	-1	-	VGNC	-	-	-	-	-	-	-	ENSCAFT00000044859.2:c.752_760dup
P1	Indel.LOH	28	28:36918697-36918697	CTT	inframe_insertion	MODERATE	-	ENSCAFG00000013255	Transcript	ENSCAFT00000021024	protein_coding	13/15	-	-	-	4873-4874	4493-4494	1498	R/RR	agg/agAAGg	-	-	-1	-	-	-	-	-	-	-	-	-	ENSCAFT00000021024.4:c.4457_4458insAAG
P1	Indel.LOH	28	28:40567551-40567551	T	frameshift_variant	HIGH	-	ENSCAFG00000031138	Transcript	ENSCAFT00000047321	protein_coding	1/1	-	-	-	1015-1016	1015-1016	339	A/DX	gcc/gAcc	-	-	-1	-	-	-	-	-	-	-	-	-
P1	Indel.LOH	31	31:37278371-37278371	T	frameshift_variant	HIGH	-	ENSCAFG00000029964	Transcript	ENSCAFT00000046703	protein_coding	1/1	-	-	-	2272-2273	2272-2273	758	P/LX	cca/cTca	-	-	1	-	-	-	-	-	-	-	-	-
P1	Indel.LOH	31	31:38191986-38192001	-	inframe_deletion	MODERATE	-	ENSCAFG00000030000	Transcript	ENSCAFT00000046497	protein_coding	2/15	-	-	-	459-473	459-473	153-158	GPGRRG/G	ggACCAGGGAGGAGAGGg/ggg	-	-	-1	-	-	-	-	-	-	-	-	-
P1	Indel.LOH	33	33:4985282-4985282	CGCTGGCGGGGA	inframe_insertion	MODERATE	RIOX2	ENSCAFG00000009120	Transcript	ENSCAFT00000038254	protein_coding	2/10	-	-	-	390-391	342-343	114-115	-/SPPA	-/TCCCCGCCAGCG	-	-	-1	-	VGNC	-	-	-	-	-	-	-
P1	Indel.Somatic	35	35:24124132-24124138	-	inframe_deletion	MODERATE	-	ENSCAFG00000024272	Transcript	ENSCAFT00000037489	protein_coding	1/2	-	-	-	350-355	350-355	117-119	AKP/A	gCCAAGCcc/gcc	rs851176735	-	1	-	-	-	-	-	-	-	-	-
P1	Indel.Somatic	36	36:10044782-10044782	CC	frameshift_variant	HIGH	-	ENSCAFG00000031461	Transcript	ENSCAFT00000047861	protein_coding	1/1	-	-	-	281-282	281-282	94	R/RX	cgc/cgCCc	-	-	1	-	-	-	-	-	-	-	-	-
P1	Indel.LOH	37	37:1433815-1433815	GGGCGC	inframe_insertion	MODERATE	GLS	ENSCAFG00000009513	Transcript	ENSCAFT00000015115	protein_coding	1/18	-	-	-	420-421	386-387	129	G/GGA	ggg/ggGGGCGCg	-	-	1	-	VGNC	-	-	-	-	-	-	-	ENSCAFT00000015115.5:c.398_403dup
P1	Indel.Somatic	X	X:3600980-3600980	AG	frameshift_variant	HIGH	-	ENSCAFG00000029931	Transcript	ENSCAFT00000045308	protein_coding	1/1	-	-	-	229-230	229-230	77	K/KX	aag/aAGag	-	-	1	-	-	-	-	-	-	-	-	-
P1	Indel.LOH	X	X:76315044-76315048	-	frameshift_variant	HIGH	GPRASP1	ENSCAFG00000017775	Transcript	ENSCAFT00000028184	protein_coding	1/3	-	-	-	1306-1309	1306-1309	436-437	RW/X	CGGTgg/gg	-	-	1	-	VGNC	-	-	-	-	-	-	-	ENSCAFT00000028184.4:c.1306_1307+2del
P2	Indel.Somatic	1	1:112085161-112085162	-	frameshift_variant	HIGH	CIC	ENSCAFG00000004858	Transcript	ENSCAFT00000007834	protein_coding	13/20	-	-	-	3115	3115	1039	V/X	Gta/ta	-	-	-1	-	VGNC	-	-	-	-	-	-	-	ENSCAFT00000007834.4:c.2968del
P2	Indel.LOH	1	1:118924872-118924874	-	frameshift_variant,splice_region_variant	HIGH	LRP3	ENSCAFG00000007433	Transcript	ENSCAFT00000011915	protein_coding	5/6	-	-	-	1441-1442	1441-1442	481	A/X	GCc/c	-	-	-1	-	VGNC	-	-	-	-	-	-	-
P2	Indel.Somatic	1	1:24498591-24498593	-	frameshift_variant	HIGH	-	ENSCAFG00000029562	Transcript	ENSCAFT00000044639	protein_coding	1/1	-	-	-	222-223	222-223	74-75	DT/DX	gaTAca/gaca	rs851972674	-	-1	-	-	-	-	-	-	-	-	-
P2	Indel.LOH	1	1:68164414-68164415	-	frameshift_variant	HIGH	-	ENSCAFG00000029164	Transcript	ENSCAFT00000043954	protein_coding	1/1	-	-	-	213	213	71	R/X	agA/ag	-	-	1	-	-	-	-	-	-	-	-	-
P2	Indel.Somatic	1	1:69383759-69383761	-	frameshift_variant	HIGH	-	ENSCAFG00000028602	Transcript	ENSCAFT00000042989	protein_coding	1/1	-	-	-	243-244	243-244	81-82	KR/KX	aaAAga/aaga	-	-	-1	-	-	-	-	-	-	-	-	-
P2	Indel.LOH	1	1:72928059-72928062	-	inframe_deletion	MODERATE	GAS1	ENSCAFG00000023269	Transcript	ENSCAFT00000035676	protein_coding	1/1	-	-	-	265-267	265-267	89	A/-	GCC/-	-	-	1	-	VGNC	-	-	-	-	-	-	-	ENSCAFT00000035676.3:c.415_417del
P2	Indel.LOH	1	1:79987634-79987634	AAAAGAAAA	inframe_insertion	MODERATE	-	ENSCAFG00000030357	Transcript	ENSCAFT00000045380	protein_coding	2/2	-	-	-	817-818	143-144	48	R/RKEK	aga/agAAAAGAAAAa	-	-	1	-	-	-	-	-	-	-	-	-
P2	Indel.Somatic	1	1:82062199-82062199	G	frameshift_variant	HIGH	-	ENSCAFG00000030179	Transcript	ENSCAFT00000049723	protein_coding	1/4	-	-	-	1045-1046	230-231	77	A/AX	gcg/gcGg	-	-	1	-	-	-	-	-	-	-	-	-	ENSCAFT00000049723.3:c.483dup
P2	Indel.Somatic	1	1:93037348-93037348	GCGGCGGCGGCGGCGGCGGCG	inframe_insertion	MODERATE	PLPP6	ENSCAFG00000002075	Transcript	ENSCAFT00000003285	protein_coding	1/1	-	-	-	97-98	97-98	33	R/RGGGGGGG	cgc/cGCGGCGGCGGCGGCGGCGGCGgc	-	-	1	-	VGNC	-	-	-	-	-	-	-	ENSCAFT00000003285.3:c.130_150dup
P3	Indel.LOH	1	1:113816754-113816758	-	frameshift_variant,splice_region_variant	HIGH	ZFP36	ENSCAFG00000005530	Transcript	ENSCAFT00000008910	protein_coding	2/3	-	-	-	492-495	492-495	164-165	PF/X	ccTTTT/cc	-	-	-1	-	VGNC	-	-	-	-	-	-	-	ENSCAFT00000008910.3:c.523_526del
P3	Indel.LOH	1	1:113816754-113816758	-	frameshift_variant	HIGH	ZFP36	ENSCAFG00000005530	Transcript	ENSCAFT00000042970	protein_coding	2/2	-	-	-	507-510	507-510	169-170	PF/X	ccTTTT/cc	-	-	-1	-	VGNC	-	-	-	-	-	-	-
P3	Indel.LOH	1	1:117055645-117055663	-	inframe_deletion	MODERATE	-	ENSCAFG00000031076	Transcript	ENSCAFT00000049649	protein_coding	1/2	-	-	-	764-781	144-161	48-54	APPVAEA/A	gcTCCACCTGTGGCAGAGGCc/gcc	-	-	-1	-	-	-	-	-	-	-	-	-	ENSCAFT00000049649.2:c.144_161del
P3	Indel.LOH	1	1:60596879-60596879	C	frameshift_variant	HIGH	-	ENSCAFG00000030746	Transcript	ENSCAFT00000045887	protein_coding	1/2	-	-	-	2118-2119	1245-1246	415-416	-/X	-/G	rs851216535	-	-1	-	-	-	-	-	-	-	-	-
P3	Indel.LOH	1	1:60596879-60596879	C	frameshift_variant	HIGH	-	ENSCAFG00000030746	Transcript	ENSCAFT00000047886	protein_coding	1/2	-	-	-	2118-2119	1245-1246	415-416	-/X	-/G	rs851216535	-	-1	-	-	-	-	-	-	-	-	-
P3	Indel.LOH	1	1:81543455-81543455	G	frameshift_variant	HIGH	FOXB2	ENSCAFG00000001637	Transcript	ENSCAFT00000002574	protein_coding	2/2	-	-	-	785-786	785-786	262	S/SX	tcg/tcCg	-	-	-1	-	VGNC	-	-	-	-	-	-	-	ENSCAFT00000002574.5:c.767dup
P3	Indel.LOH	1	1:94694739-94694740	-	frameshift_variant	HIGH	-	ENSCAFG00000002155	Transcript	ENSCAFT00000003391	protein_coding	1/30	-	-	-	10	10	4	L/X	Ctc/tc	-	-	-1	-	-	-	-	-	-	-	-	-
P3	Indel.LOH	2	2:4349083-4349092	-	inframe_deletion	MODERATE	-	ENSCAFG00000029328	Transcript	ENSCAFT00000047168	protein_coding	8/13	-	-	-	1333-1341	1333-1341	445-447	QEE/-	CAGGAGGAG/-	-	-	-1	-	-	-	-	-	-	-	-	-
P3	Indel.LOH	2	2:6540766-6540769	-	inframe_deletion	MODERATE	-	ENSCAFG00000030789	Transcript	ENSCAFT00000045615	protein_coding	8/13	-	-	-	1333-1335	1333-1335	445	Q/-	CAG/-	-	-	-1	-	-	-	-	-	-	-	-	-
P3	Indel.LOH	2	2:72910715-72910716	-	frameshift_variant	HIGH	SYTL1	ENSCAFG00000012169	Transcript	ENSCAFT00000019337	protein_coding	16/16	-	-	-	2030	1904	635	G/X	gGc/gc	-	-	-1	-	HGNC	HGNC:15584	-	-	-	-	-	-
P3	Indel.LOH	2	2:77366534-77366535	-	frameshift_variant	HIGH	HSPG2	ENSCAFG00000014773	Transcript	ENSCAFT00000023453	protein_coding	83/86	-	-	-	10747	10747	3583	S/X	Tct/ct	-	-	1	-	VGNC	-	-	-	-	-	-	-	ENSCAFT00000023453.5:c.10765del
P3	Indel.LOH	2	2:77366534-77366535	-	frameshift_variant	HIGH	HSPG2	ENSCAFG00000014773	Transcript	ENSCAFT00000045470	protein_coding	96/99	-	-	-	12868	12868	4290	S/X	Tct/ct	-	-	1	-	VGNC	-	-	-	-	-	-	-	ENSCAFT00000045470.3:c.12676del
P3	Indel.Somatic	4	4:25292801-25292825	-	splice_acceptor_variant,coding_sequence_variant,intron_variant	HIGH	KAT6B	ENSCAFG00000015357	Transcript	ENSCAFT00000024383	protein_coding	16/18	15/17	-	-	?-3254	?-3254	?-1085	-	-	-	-	1	-	VGNC	-	-	-	-	-	-	-	ENSCAFT00000024383.5:c.3335_3358del
P3	Indel.Somatic	4	4:25586589-25586590	-	frameshift_variant	HIGH	ZNF503	ENSCAFG00000015427	Transcript	ENSCAFT00000024477	protein_coding	2/2	-	-	-	450	450	150	G/X	ggC/gg	-	-	-1	-	VGNC	-	-	-	-	-	-	-	ENSCAFT00000024477.5:c.450del
P3	Indel.LOH	4	4:72076805-72076807	-	frameshift_variant	HIGH	-	ENSCAFG00000029561	Transcript	ENSCAFT00000046207	protein_coding	2/2	-	-	-	380-381	380-381	127	Q/X	cAA/c	-	-	1	-	-	-	-	-	-	-	-	-
P3	Indel.Somatic	4	4:9877424-9877439	-	inframe_deletion	MODERATE	CCSAP	ENSCAFG00000030050	Transcript	ENSCAFT00000048744	protein_coding	1/4	-	-	-	290-304	48-62	16-21	RGAGGP/R	cgGGGGGCCGGGGGGCCg/cgg	-	-	1	-	VGNC	-	-	-	-	-	-	-
P3	Indel.LOH	5	5:21323892-21323898	-	inframe_deletion	MODERATE	PPP2R1B	ENSCAFG00000014183	Transcript	ENSCAFT00000045654	protein_coding	1/15	-	-	-	231-236	231-236	77-79	AGR/A	gcGGGGCGg/gcg	-	-	1	-	VGNC	-	-	-	-	-	-	-	ENSCAFT00000045654.3:c.240_245del
P3	Indel.LOH	5	5:32592363-32592363	C	frameshift_variant	HIGH	EFNB3	ENSCAFG00000031192	Transcript	ENSCAFT00000042891	protein_coding	5/5	-	-	-	999-1000	999-1000	333-334	-/X	-/C	-	-	1	-	VGNC	-	-	-	-	-	-	-	ENSCAFT00000042891.3:c.1001dup
P3	Indel.LOH	5	5:38481396-38481396	A	frameshift_variant	HIGH	-	ENSCAFG00000028937	Transcript	ENSCAFT00000044429	protein_coding	1/2	-	-	-	22-23	22-23	8	Q/QX	caa/cAaa	-	-	1	-	-	-	-	-	-	-	-	-
P3	Indel.LOH	6	6:31471866-31471867	-	frameshift_variant	HIGH	TNP2	ENSCAFG00000031312	Transcript	ENSCAFT00000044944	protein_coding	1/4	-	-	-	13	13	5	K/X	Aaa/aa	-	-	1	-	HGNC	HGNC:11952	-	-	-	-	-	-
P3	Indel.LOH	6	6:37982406-37982407	-	frameshift_variant	HIGH	MEFV	ENSCAFG00000024473	Transcript	ENSCAFT00000048060	protein_coding	6/7	-	-	-	2031	651	217	S/X	tcG/tc	rs852936027	-	1	-	VGNC	-	-	-	-	-	-	-
P3	Indel.LOH	6	6:38339445-38339445	GCT	inframe_insertion	MODERATE	-	ENSCAFG00000019353	Transcript	ENSCAFT00000030755	protein_coding	1/5	-	-	-	439-440	20-21	7	A/AL	gcg/gcGCTg	-	-	1	-	-	-	-	-	-	-	-	-
P3	Indel.LOH	6	6:38974017-38974018	-	splice_acceptor_variant,non_coding_transcript_variant	HIGH	-	ENSCAFG00000039020	Transcript	ENSCAFT00000050851	lincRNA	-	1/1	-	-	-	-	-	-	-	-	-	1	-	-	-	-	-	-	-	-	-
P3	Indel.LOH	6	6:69866825-69866831	-	inframe_deletion	MODERATE	ST6GALNAC5	ENSCAFG00000020386	Transcript	ENSCAFT00000032464	protein_coding	1/4	-	-	-	201-206	201-206	67-69	PAP/P	ccGGCCCCc/ccc	-	-	-1	-	VGNC	-	-	-	-	-	-	-	ENSCAFT00000032464.4:c.213_218del
P3	Indel.LOH	7	7:38253976-38253980	-	frameshift_variant	HIGH	-	ENSCAFG00000029029	Transcript	ENSCAFT00000047323	protein_coding	1/1	-	-	-	1793-1796	1793-1796	598-599	VW/X	gTGTGg/gg	-	-	-1	-	-	-	-	-	-	-	-	-
P3	Indel.LOH	7	7:42960259-42960259	C	frameshift_variant	HIGH	-	ENSCAFG00000030928	Transcript	ENSCAFT00000045855	protein_coding	2/2	-	-	-	243-244	243-244	81-82	-/X	-/C	-	-	1	-	-	-	-	-	-	-	-	-
P3	Indel.LOH	7	7:65957053-65957053	CGCCCG	inframe_insertion	MODERATE	-	ENSCAFG00000023151	Transcript	ENSCAFT00000035423	protein_coding	1/5	-	-	-	286-287	286-287	96	G/AGG	gga/gCGGGCGga	-	-	-1	-	-	-	-	-	-	-	-	-
P3	Indel.LOH	8	8:72787484-72787484	G	frameshift_variant	HIGH	-	ENSCAFG00000031417	Transcript	ENSCAFT00000048287	protein_coding	1/1	-	-	-	386-387	386-387	129	A/AX	gcg/gcGg	-	-	1	-	-	-	-	-	-	-	-	-
P3	Indel.LOH	9	9:19078030-19078040	-	frameshift_variant	HIGH	GRN	ENSCAFG00000014165	Transcript	ENSCAFT00000022483	protein_coding	13/14	-	-	-	2331-2340	1543-1552	515-518	PTHH/X	CCCACCCATCat/at	-	-	-1	-	VGNC	-	-	-	-	-	-	-	ENSCAFT00000022483.4:c.1534_1543del
P3	Indel.LOH	9	9:21867315-21867339	-	inframe_deletion	MODERATE	KRT10	ENSCAFG00000016007	Transcript	ENSCAFT00000025391	protein_coding	7/8	-	-	-	1377-1400	1377-1400	459-467	GGGSSGGGY/G	ggCGGCGGAAGTTCCGGCGGCGGCTAc/ggc	-	-	1	-	VGNC	-	-	-	-	-	-	-	ENSCAFT00000025391.4:c.1423_1446del
P3	Indel.LOH	9	9:51924902-51924905	-	inframe_deletion	MODERATE	SETX	ENSCAFG00000019897	Transcript	ENSCAFT00000031656	protein_coding	10/27	-	-	-	3271-3273	3087-3089	1029-1030	SD/S	tcTGAt/tct	rs852619957	-	1	-	VGNC	-	-	-	-	-	-	-	ENSCAFT00000031656.4:c.3108_3110del
P3	Indel.LOH	10	10:20640985-20640986	-	frameshift_variant	HIGH	-	ENSCAFG00000029857	Transcript	ENSCAFT00000049594	protein_coding	1/3	-	-	-	50	50	17	T/X	aCc/ac	-	-	1	-	-	-	-	-	-	-	-	-
P3	Indel.LOH	10	10:23262033-23262033	G	frameshift_variant	HIGH	-	ENSCAFG00000029271	Transcript	ENSCAFT00000043758	protein_coding	5/9	-	-	-	190-191	190-191	64	R/PX	cga/cCga	-	-	-1	-	-	-	-	-	-	-	-	-
P3	Indel.LOH	10	10:26582959-26582965	-	inframe_deletion	MODERATE	BAIAP2L2	ENSCAFG00000001427	Transcript	ENSCAFT00000002222	protein_coding	12/16	-	-	-	964-969	964-969	322-323	GG/-	GGCGGC/-	rs853028197	-	1	-	VGNC	-	-	-	-	-	-	-
P3	Indel.Somatic	11	11:40000277-40000280	-	inframe_deletion	MODERATE	MLLT3	ENSCAFG00000001635	Transcript	ENSCAFT00000002592	protein_coding	5/11	-	-	-	821-823	511-513	171	C/-	TGC/-	-	-	-1	-	VGNC	-	-	-	-	-	-	-	ENSCAFT00000002592.4:c.502_504del
P3	Indel.LOH	12	12:21224859-21224859	A	frameshift_variant	HIGH	-	ENSCAFG00000030849	Transcript	ENSCAFT00000048415	protein_coding	1/1	-	-	-	200-201	200-201	67	R/RX	aga/agAa	-	-	1	-	-	-	-	-	-	-	-	-
P3	Indel.LOH	12	12:21224871-21224872	-	frameshift_variant	HIGH	-	ENSCAFG00000030849	Transcript	ENSCAFT00000048415	protein_coding	1/1	-	-	-	213	213	71	R/X	agA/ag	-	-	1	-	-	-	-	-	-	-	-	-
P3	Indel.LOH	13	13:31398462-31398463	-	frameshift_variant	HIGH	-	ENSCAFG00000031399	Transcript	ENSCAFT00000049023	protein_coding	1/3	-	-	-	905	78	26	P/X	ccC/cc	rs852882764	-	-1	-	-	-	-	-	-	-	-	-
P3	Indel.LOH	13	13:62670030-62670031	-	frameshift_variant	HIGH	-	ENSCAFG00000031464	Transcript	ENSCAFT00000043490	protein_coding	1/1	-	-	-	105	105	35	V/X	gtC/gt	-	-	1	-	-	-	-	-	-	-	-	-
P3	Indel.LOH	14	14:18195676-18195679	-	inframe_deletion	MODERATE	-	ENSCAFG00000030717	Transcript	ENSCAFT00000046629	protein_coding	1/1	-	-	-	105-107	105-107	35-36	LS/L	ctTTCt/ctt	-	-	1	-	-	-	-	-	-	-	-	-
P3	Indel.LOH	14	14:38629667-38629669	-	frameshift_variant	HIGH	-	ENSCAFG00000029320	Transcript	ENSCAFT00000044212	protein_coding	1/1	-	-	-	887-888	887-888	296	L/X	tTA/t	-	-	-1	-	-	-	-	-	-	-	-	-
P3	Indel.Somatic	14	14:40329189-40329192	-	inframe_deletion	MODERATE	HOXA7	ENSCAFG00000002957	Transcript	ENSCAFT00000004737	protein_coding	2/2	-	-	-	655-657	655-657	219	A/-	GCC/-	rs851470433	-	-1	-	VGNC	-	-	-	-	-	-	-
P3	Indel.LOH	15	15:6024811-6024811	A	frameshift_variant	HIGH	-	ENSCAFG00000029196	Transcript	ENSCAFT00000043996	protein_coding	1/1	-	-	-	133-134	133-134	45	S/FX	tct/tTct	-	-	-1	-	-	-	-	-	-	-	-	-
P3	Indel.LOH	15	15:7691422-7691423	-	frameshift_variant	HIGH	-	ENSCAFG00000031050	Transcript	ENSCAFT00000046008	protein_coding	1/1	-	-	-	488	488	163	V/X	gTg/gg	-	-	1	-	-	-	-	-	-	-	-	-
P3	Indel.LOH	17	17:37729596-37729602	-	inframe_deletion	MODERATE	-	ENSCAFG00000007370	Transcript	ENSCAFT00000011797	protein_coding	2/2	-	-	-	246-251	246-251	82-84	FSS/F	ttCAGCAGc/ttc	-	-	1	-	-	-	-	-	-	-	-	-	ENSCAFT00000011797.4:c.231_236del
P3	Indel.LOH	17	17:37729607-37729607	A	frameshift_variant	HIGH	-	ENSCAFG00000007370	Transcript	ENSCAFT00000011797	protein_coding	2/2	-	-	-	256-257	256-257	86	G/EX	gga/gAga	rs852027546	-	1	-	-	-	-	-	-	-	-	-	ENSCAFT00000011797.4:c.238_239insA
P3	Indel.LOH	17	17:40080828-40080828	G	frameshift_variant	HIGH	TRABD2A	ENSCAFG00000007876	Transcript	ENSCAFT00000049228	protein_coding	1/7	-	-	-	49-50	49-50	17	Q/RX	cag/cGag	-	-	1	-	VGNC	-	-	-	-	-	-	-	ENSCAFT00000049228.3:c.49_50insG
P3	Indel.LOH	20	20:46726307-46726311	-	frameshift_variant,splice_region_variant	HIGH	PGLYRP2	ENSCAFG00000015962	Transcript	ENSCAFT00000025308	protein_coding	2/7	-	-	-	149-152	149-152	50-51	VN/X	gTGAAt/gt	-	-	1	-	VGNC	-	-	-	-	-	-	-
P3	Indel.LOH	20	20:48517884-48517886	-	frameshift_variant	HIGH	RFX1	ENSCAFG00000016511	Transcript	ENSCAFT00000029732	protein_coding	20/20	-	-	-	3317-3318	2819-2820	940	E/X	gAA/g	-	-	1	-	VGNC	-	-	-	-	-	-	-	ENSCAFT00000029732.5:c.2711_2712del
P3	Indel.LOH	20	20:5585939-5585939	T	frameshift_variant,splice_region_variant	HIGH	PLXND1	ENSCAFG00000004613	Transcript	ENSCAFT00000007454	protein_coding	10/36	-	-	-	2443-2444	2443-2444	815	G/VX	ggg/gTgg	rs852296177	-	1	-	VGNC	-	-	-	-	-	-	-	ENSCAFT00000007454.5:c.2443_2444insT
P3	Indel.LOH	23	23:39471643-39471646	-	inframe_deletion	MODERATE	-	ENSCAFG00000029025	Transcript	ENSCAFT00000044424	protein_coding	1/1	-	-	-	1114-1116	1114-1116	372	R/-	CGG/-	-	-	-1	-	-	-	-	-	-	-	-	-	ENSCAFT00000044424.2:c.830_832del
P3	Indel.Somatic	23	23:49281776-49281776	CGGGGGCGGGGCCTCCGGGGGCGGGGTCTC	inframe_insertion	MODERATE	PLCH1	ENSCAFG00000008746	Transcript	ENSCAFT00000013905	protein_coding	24/24	-	-	-	5391-5392	4915-4916	1639	A/GDPAPGGPAPA	gcc/gGAGACCCCGCCCCCGGAGGCCCCGCCCCCGcc	-	-	-1	-	VGNC	-	-	-	-	-	-	-	ENSCAFT00000013905.5:c.4915_4916insGAGACCCCGCCCCCGGAGGCCCCGCCCCCG
P3	Indel.LOH	23	23:7047044-7047060	-	frameshift_variant	HIGH	-	ENSCAFG00000029998	Transcript	ENSCAFT00000045440	protein_coding	1/1	-	-	-	660-675	660-675	220-225	LPAPRL/X	ctCCCGGCTCCCCGGCTC/ct	-	-	1	-	-	-	-	-	-	-	-	-
P3	Indel.LOH	23	23:8811022-8811022	G	frameshift_variant	HIGH	TTC21A	ENSCAFG00000005087	Transcript	ENSCAFT00000008176	protein_coding	24/28	-	-	-	3385-3386	3385-3386	1129	R/RX	cgg/cGgg	-	-	1	-	VGNC	-	-	-	-	-	-	-
P3	Indel.LOH	24	24:15803269-15803269	CGGCCT	inframe_insertion	MODERATE	LRRN4	ENSCAFG00000024978	Transcript	ENSCAFT00000038653	protein_coding	1/4	-	-	-	145-146	136-137	46	T/TAS	acg/aCGGCCTcg	-	-	1	-	VGNC	-	-	-	-	-	-	-	ENSCAFT00000038653.2:c.143_148dup
P3	Indel.LOH	24	24:20540696-20540699	-	inframe_deletion	MODERATE	ZCCHC3	ENSCAFG00000025206	Transcript	ENSCAFT00000048621	protein_coding	1/2	-	-	-	37-39	37-39	13	K/-	AAA/-	-	-	-1	-	HGNC	HGNC:16230	-	-	-	-	-	-
P3	Indel.LOH	25	25:20942452-20942452	G	frameshift_variant	HIGH	-	ENSCAFG00000029275	Transcript	ENSCAFT00000049793	protein_coding	1/2	-	-	-	312-313	312-313	104-105	-/X	-/G	-	-	1	-	-	-	-	-	-	-	-	-
P3	Indel.LOH	25	25:49318269-49318270	-	frameshift_variant	HIGH	HDAC4	ENSCAFG00000012546	Transcript	ENSCAFT00000019989	protein_coding	27/28	-	-	-	3548	3113	1038	E/X	gAg/gg	-	-	-1	-	VGNC	-	-	-	-	-	-	-	ENSCAFT00000019989.4:c.3082-2del
P3	Indel.LOH	25	25:50490983-50490983	C	frameshift_variant	HIGH	GPC1	ENSCAFG00000012663	Transcript	ENSCAFT00000020095	protein_coding	8/9	-	-	-	1470-1471	1470-1471	490-491	-/X	-/C	-	-	1	-	VGNC	-	-	-	-	-	-	-
P3	Indel.LOH	26	26:11512056-11512056	GCTGCACATTCT	inframe_insertion	MODERATE	-	ENSCAFG00000030864	Transcript	ENSCAFT00000046871	protein_coding	1/1	-	-	-	682-683	682-683	228	R/QNVQR	cgg/cAGAATGTGCAGCgg	-	-	-1	-	-	-	-	-	-	-	-	-
P3	Indel.Somatic	27	27:38367811-38367811	GGCCCAGGCCCAGGCCCA	inframe_insertion	MODERATE	ZNF384	ENSCAFG00000014740	Transcript	ENSCAFT00000023420	protein_coding	11/11	-	-	-	1820-1821	1418-1419	473	V/VAQAQAQ	gtg/gtGGCCCAGGCCCAGGCCCAg	-	-	1	-	VGNC	-	-	-	-	-	-	-	ENSCAFT00000023420.4:c.1422_1439dup
P3	Indel.LOH	28	28:24623398-24623398	GTGTGT	protein_altering_variant,splice_region_variant	MODERATE	CASP7	ENSCAFG00000011157	Transcript	ENSCAFT00000017737	protein_coding	-	-	-	-	504-505	373-374	125	A/GVS	gcc/gGTGTGTcc	rs852960032	-	1	-	VGNC	-	-	-	-	-	-	-	ENSCAFT00000017737.4:c.373+9_373+14dup
P3	Indel.LOH	28	28:25816770-25816770	CGGCGGCGGCGG	inframe_insertion	MODERATE	ATRNL1	ENSCAFG00000011725	Transcript	ENSCAFT00000018678	protein_coding	1/29	-	-	-	471-472	74-75	25	V/VGGGG	gtc/gtCGGCGGCGGCGGc	-	-	1	-	VGNC	-	-	-	-	-	-	-	ENSCAFT00000018678.5:c.75_76insGGCGGCGGCGGC
P3	Indel.LOH	28	28:31705891-31705892	-	frameshift_variant	HIGH	-	ENSCAFG00000012412	Transcript	ENSCAFT00000019700	protein_coding	1/1	-	-	-	147	147	49	T/X	acA/ac	rs850985714	-	1	-	-	-	-	-	-	-	-	-	ENSCAFT00000019700.4:c.438del
P3	Indel.LOH	28	28:4535384-4535390	-	inframe_deletion	MODERATE	-	ENSCAFG00000007165	Transcript	ENSCAFT00000039603	protein_coding	1/7	-	-	-	416-421	416-421	139-141	AAV/V	gCCGCCGtc/gtc	-	-	-1	-	-	-	-	-	-	-	-	-
P3	Indel.LOH	29	29:21249145-21249145	C	frameshift_variant	HIGH	-	ENSCAFG00000024194	Transcript	ENSCAFT00000037414	protein_coding	1/1	-	-	-	615-616	615-616	205-206	-/X	-/C	-	-	1	-	-	-	-	-	-	-	-	-
P3	Indel.LOH	30	30:16576673-16576682	-	splice_acceptor_variant,non_coding_transcript_exon_variant,intron_variant	HIGH	-	ENSCAFG00000033529	Transcript	ENSCAFT00000056023	lincRNA	2/2	1/1	-	-	?-239	-	-	-	-	-	-	-1	-	-	-	-	-	-	-	-	-
P3	Indel.LOH	30	30:755845-755857	-	inframe_deletion	MODERATE	NUTM1	ENSCAFG00000007829	Transcript	ENSCAFT00000012500	protein_coding	8/9	-	-	-	3083-3094	3083-3094	1028-1032	MTMGR/R	aTGACCATGGGGAgg/agg	-	-	-1	-	HGNC	HGNC:29919	-	-	-	-	-	-
P3	Indel.LOH	33	33:29046187-29046187	T	frameshift_variant	HIGH	MUC20	ENSCAFG00000012807	Transcript	ENSCAFT00000020314	protein_coding	1/4	-	-	-	215-216	29-30	10	P/PX	cca/ccTa	-	-	1	-	VGNC	-	-	-	-	-	-	-	ENSCAFT00000020314.5:c.308_309insT
P3	Indel.Somatic	36	36:5793614-5793614	A	frameshift_variant	HIGH	PLA2R1	ENSCAFG00000009598	Transcript	ENSCAFT00000015277	protein_coding	1/29	-	-	-	40-41	30-31	10-11	-/X	-/T	-	-	-1	-	VGNC	-	-	-	-	-	-	-	ENSCAFT00000015277.4:c.30dup
P3	Indel.LOH	38	38:22114668-22114669	-	frameshift_variant	HIGH	-	ENSCAFG00000029844	Transcript	ENSCAFT00000047126	protein_coding	1/2	-	-	-	525	525	175	R/X	cgC/cg	-	-	1	-	-	-	-	-	-	-	-	-
