# Supplementary material for: Whole genome sequencing analysis of high confidence variants of B-cell lymphoma in Canis familiaris
Source: PLoS One. 2020 Aug 28;15(8):e0238183. doi: 10.1371/journal.pone.0238183 (PMC7454977; doi:10.1371/journal.pone.0238183)
Supplement: S3 File — (XLSX) [file pone.0238183.s003.xlsx]

## Sheet: Sheet1
Case	File	Location	Allele	Gene	Feature	Feature (-version)	Feature_type	Consequence	cDNA_position	CDS_position	Protein_position	Amino_acids	Codons	Existing_variation	IMPACT	SYMBOL	BIOTYPE	EXON	INTRON	HGVSc	HGVSp	STRAND	SYMBOL_SOURCE	HGNC_ID	ENSP	HGVS_OFFSET
G1	Indel.LOH	1:110148630-110148633	-	ENSCAFG00000004455	ENSCAFT00000007180.5	ENSCAFT00000007180	Transcript	inframe_deletion	180-182	180-182	60-61	PF/P	ccATTc/ccc	rs852110586	MODERATE	CD3EAP	protein_coding	EXON=2/3		ENSCAFT00000007180.5:c.180_182del	ENSCAFP00000006647.4:p.Phe61del	-1	VGNC		ENSCAFP00000006647
G1	Indel.LOH	1:110148630-110148633	-	ENSCAFG00000004455	ENSCAFT00000086161.1	ENSCAFT00000086161	Transcript	inframe_deletion	180-182	180-182	60-61	PF/P	ccATTc/ccc	rs852110586	MODERATE	CD3EAP	protein_coding	EXON=2/4		ENSCAFT00000086161.1:c.180_182del	ENSCAFP00000050941.1:p.Phe61del	-1	VGNC		ENSCAFP00000050941
G1	Indel.Somatic	1:118849366-118849366	GCGGAA	ENSCAFG00000007407	ENSCAFT00000011866.4	ENSCAFT00000011866	Transcript	inframe_insertion	181-182	181-182	61	G/GGS	ggc/gGCGGAAgc	-	MODERATE		protein_coding	EXON=1/1		ENSCAFT00000011866.4:c.185_186insAAGCGG	ENSCAFP00000011002.4:p.Gly62_Gly63insSerGly	1			ENSCAFP00000011002	4
G1	Indel.LOH	1:44897163-44897172	-	ENSCAFG00000000577	ENSCAFT00000085282.1	ENSCAFT00000085282	Transcript	inframe_deletion	927-935	601-609	201-203	EAG/-	GAGGCCGGC/-	-	MODERATE	TIAM2	protein_coding	EXON=3/27		ENSCAFT00000085282.1:c.606_614del	ENSCAFP00000066669.1:p.Gly212_Ala214del	1	VGNC		ENSCAFP00000066669	5
G1	Indel.LOH	1:56968829-56968830	-	ENSCAFG00000048666	ENSCAFT00000079687.1	ENSCAFT00000079687	Transcript	frameshift_variant	540	540	180	I/X	atC/at	rs852599759	HIGH		protein_coding	EXON=1/1		ENSCAFT00000079687.1:c.540del	ENSCAFP00000064468.1:p.Tyr181ThrfsTer24	-1			ENSCAFP00000064468
G1	Indel.LOH	1:67336861-67336861	CAC	ENSCAFG00000045490	ENSCAFT00000086216.1	ENSCAFT00000086216	Transcript	inframe_insertion	2609-2610	2609-2610	870	I/IT	atc/atCACc	-	MODERATE		protein_coding	EXON=1/1		ENSCAFT00000086216.1:c.2610_2612dup	ENSCAFP00000049366.1:p.Thr871dup	1			ENSCAFP00000049366	3
G1	Indel.Somatic	12:49630532-49630532	TTTTTC	ENSCAFG00000029840	ENSCAFT00000043519.2	ENSCAFT00000043519	Transcript	protein_altering_variant	523-524	523-524	175	E/GKK	gaa/gGAAAAAaa	-	MODERATE		protein_coding	EXON=1/1		ENSCAFT00000043519.2:c.523_524insGAAAAA	ENSCAFP00000039835.2:p.Glu175delinsGlyLysLys	-1			ENSCAFP00000039835
G1	Indel.LOH	12:58925869-58925870	-	ENSCAFG00000045295	ENSCAFT00000066527.1	ENSCAFT00000066527	Transcript	frameshift_variant	1842	1842	614	I/X	atC/at	-	HIGH		protein_coding	EXON=1/1		ENSCAFT00000066527.1:c.1842del	ENSCAFP00000053554.1:p.Thr616LeufsTer5	1			ENSCAFP00000053554
G1	Indel.LOH	13:30721456-30721457	-	ENSCAFG00000049521	ENSCAFT00000085565.1	ENSCAFT00000085565	Transcript	frameshift_variant	237	237	79	I/X	atC/at	-	HIGH		protein_coding	EXON=1/1		ENSCAFT00000085565.1:c.237del	ENSCAFP00000054351.1:p.Thr81LeufsTer5	1			ENSCAFP00000054351
G1	Indel.LOH	13:32757206-32757209	-	ENSCAFG00000029044	ENSCAFT00000043730.2	ENSCAFT00000043730	Transcript	inframe_deletion	2019-2021	1309-1311	437	K/-	AAG/-	-	MODERATE		protein_coding	EXON=4/4		ENSCAFT00000043730.2:c.1309_1311del	ENSCAFP00000041698.2:p.Lys437del	-1			ENSCAFP00000041698
G1	Indel.LOH	13:32757206-32757209	-	ENSCAFG00000029044	ENSCAFT00000073067.1	ENSCAFT00000073067	Transcript	inframe_deletion	2254-2256	1282-1284	428	K/-	AAG/-	-	MODERATE		protein_coding	EXON=3/3		ENSCAFT00000073067.1:c.1282_1284del	ENSCAFP00000060149.1:p.Lys428del	-1			ENSCAFP00000060149
G1	Indel.LOH	13:32757513-32757521	-	ENSCAFG00000029044	ENSCAFT00000043730.2	ENSCAFT00000043730	Transcript	frameshift_variant	1707-1714	997-1004	333-335	RQS/X	AGGCAGTCc/c	-	HIGH		protein_coding	EXON=4/4		ENSCAFT00000043730.2:c.997_1004del	ENSCAFP00000041698.2:p.Arg333ProfsTer6	-1			ENSCAFP00000041698
G1	Indel.LOH	13:32757513-32757521	-	ENSCAFG00000029044	ENSCAFT00000073067.1	ENSCAFT00000073067	Transcript	frameshift_variant	1942-1949	970-977	324-326	RQS/X	AGGCAGTCc/c	-	HIGH		protein_coding	EXON=3/3		ENSCAFT00000073067.1:c.970_977del	ENSCAFP00000060149.1:p.Arg324ProfsTer6	-1			ENSCAFP00000060149
G1	Indel.LOH	13:32758432-32758436	-	ENSCAFG00000029044	ENSCAFT00000073067.1	ENSCAFT00000073067	Transcript	frameshift_variant	1195-1198	223-226	75-76	TP/X	ACTCca/ca	-	HIGH		protein_coding	EXON=2/3		ENSCAFT00000073067.1:c.223_226del	ENSCAFP00000060149.1:p.Thr75HisfsTer50	-1			ENSCAFP00000060149
G1	Indel.LOH	13:32758532-32758533	-	ENSCAFG00000029044	ENSCAFT00000043730.2	ENSCAFT00000043730	Transcript	frameshift_variant	836	126	42	K/X	aaG/aa	rs852592769	HIGH		protein_coding	EXON=3/4		ENSCAFT00000043730.2:c.126del	ENSCAFP00000041698.2:p.Lys42AsnfsTer20	-1			ENSCAFP00000041698
G1	Indel.LOH	13:32758532-32758533	-	ENSCAFG00000029044	ENSCAFT00000073067.1	ENSCAFT00000073067	Transcript	frameshift_variant	1098	126	42	K/X	aaG/aa	rs852592769	HIGH		protein_coding	EXON=2/3		ENSCAFT00000073067.1:c.126del	ENSCAFP00000060149.1:p.Lys42AsnfsTer84	-1			ENSCAFP00000060149
G1	Indel.LOH	13:61888285-61888307	-	ENSCAFG00000002962	ENSCAFT00000004743.3	ENSCAFT00000004743	Transcript	frameshift_variant	81-102	81-102	27-34	PPPGSPPA/X	ccCCCCCCGGGCTCCCCGCCCGCC/cc	-	HIGH	COX18	protein_coding	EXON=1/6		ENSCAFT00000004743.3:c.81_102del	ENSCAFP00000004390.3:p.Pro28ArgfsTer197	-1	VGNC		ENSCAFP00000004390
G1	Indel.LOH	14:13636064-13636065	-	ENSCAFG00000049393	ENSCAFT00000073417.1	ENSCAFT00000073417	Transcript	frameshift_variant	1136	1136	379	S/X	aGc/ac	-	HIGH		protein_coding	EXON=1/1		ENSCAFT00000073417.1:c.1136del	ENSCAFP00000064556.1:p.Ser379ThrfsTer16	1			ENSCAFP00000064556
G1	Indel.LOH	15:48056961-48056961	TCTT	ENSCAFG00000007865	ENSCAFT00000012552.2	ENSCAFT00000012552	Transcript	frameshift_variant	208-209	208-209	70	T/IFX	act/aTCTTct	-	HIGH		protein_coding	EXON=1/1		ENSCAFT00000012552.2:c.208_209insTCTT	ENSCAFP00000044892.1:p.Thr70IlefsTer22	1			ENSCAFP00000044892
G1	Indel.LOH	15:48057178-48057180	-	ENSCAFG00000007865	ENSCAFT00000012552.2	ENSCAFT00000012552	Transcript	frameshift_variant	426-427	426-427	142-143	AV/AX	gcTGtg/gctg	-	HIGH		protein_coding	EXON=1/1		ENSCAFT00000012552.2:c.429_430del	ENSCAFP00000044892.1:p.Leu144SerfsTer3	1			ENSCAFP00000044892	3
G1	Indel.LOH	15:48057373-48057373	C	ENSCAFG00000007865	ENSCAFT00000012552.2	ENSCAFT00000012552	Transcript	frameshift_variant	620-621	620-621	207	N/NX	aac/aaCc	-	HIGH		protein_coding	EXON=1/1		ENSCAFT00000012552.2:c.622dup	ENSCAFP00000044892.1:p.Leu208ProfsTer8	1			ENSCAFP00000044892	2
G1	Indel.LOH	15:61283478-61283478	A	ENSCAFG00000008844	ENSCAFT00000069639.1	ENSCAFT00000069639	Transcript	stop_gained,frameshift_variant	1606-1607	1606-1607	536	Y/*	tac/tAac	rs852209722	HIGH	KLHL2	protein_coding	EXON=12/12		ENSCAFT00000069639.1:c.1607dup	ENSCAFP00000046681.1:p.Tyr536Ter	1	VGNC		ENSCAFP00000046681	1
G1	Indel.Somatic	16:26216713-26216714	-	ENSCAFG00000041966	ENSCAFT00000068842.1	ENSCAFT00000068842	Transcript	frameshift_variant	2512	2512	838	K/X	Aaa/aa	-	HIGH		protein_coding	EXON=1/1		ENSCAFT00000068842.1:c.2514del	ENSCAFP00000052419.1:p.Glu839SerfsTer2	1			ENSCAFP00000052419	2
G1	Indel.LOH	16:33560543-33560545	-	ENSCAFG00000006453	ENSCAFT00000010425.4	ENSCAFT00000010425	Transcript	frameshift_variant	792-793	702-703	234-235	LT/LX	ctCAca/ctca	-	HIGH	PPP2CB	protein_coding	EXON=5/7		ENSCAFT00000010425.4:c.705_706del	ENSCAFP00000009667.3:p.Leu236GlyfsTer17	1	VGNC		ENSCAFP00000009667	3
G1	Indel.LOH	16:47445467-47445467	TTTGGGAACAGGGG	ENSCAFG00000008123	ENSCAFT00000013138.4	ENSCAFT00000013138	Transcript	frameshift_variant	6927-6928	6927-6928	2309-2310	-/PLFPX	-/CCCCTGTTCCCAAA	-	HIGH	TENM3	protein_coding	EXON=25/26		ENSCAFT00000013138.4:c.6927_6928insCCCCTGTTCCCAAA	ENSCAFP00000012158.4:p.Leu2310ProfsTer6	-1	VGNC		ENSCAFP00000012158
G1	Indel.LOH	16:47445467-47445467	TTTGGGAACAGGGG	ENSCAFG00000008123	ENSCAFT00000045575.3	ENSCAFT00000045575	Transcript	frameshift_variant	6876-6877	6876-6877	2292-2293	-/PLFPX	-/CCCCTGTTCCCAAA	-	HIGH	TENM3	protein_coding	EXON=27/28		ENSCAFT00000045575.3:c.6876_6877insCCCCTGTTCCCAAA	ENSCAFP00000036175.2:p.Leu2293ProfsTer6	-1	VGNC		ENSCAFP00000036175
G1	Indel.LOH	16:47445467-47445467	TTTGGGAACAGGGG	ENSCAFG00000008123	ENSCAFT00000075147.1	ENSCAFT00000075147	Transcript	frameshift_variant	8225-8226	7296-7297	2432-2433	-/PLFPX	-/CCCCTGTTCCCAAA	-	HIGH	TENM3	protein_coding	EXON=27/28		ENSCAFT00000075147.1:c.7296_7297insCCCCTGTTCCCAAA	ENSCAFP00000057075.1:p.Leu2433ProfsTer6	-1	VGNC		ENSCAFP00000057075
G1	Indel.LOH	16:47445467-47445467	TTTGGGAACAGGGG	ENSCAFG00000008123	ENSCAFT00000074812.1	ENSCAFT00000074812	Transcript	frameshift_variant	6894-6895	6894-6895	2298-2299	-/PLFPX	-/CCCCTGTTCCCAAA	-	HIGH	TENM3	protein_coding	EXON=28/29		ENSCAFT00000074812.1:c.6894_6895insCCCCTGTTCCCAAA	ENSCAFP00000061099.1:p.Leu2299ProfsTer6	-1	VGNC		ENSCAFP00000061099
G1	Indel.LOH	16:47445471-47445471	GGG	ENSCAFG00000008123	ENSCAFT00000013138.4	ENSCAFT00000013138	Transcript	inframe_insertion	6923-6924	6923-6924	2308	F/FP	ttt/ttCCCt	-	MODERATE	TENM3	protein_coding	EXON=25/26		ENSCAFT00000013138.4:c.6923_6924insCCC	ENSCAFP00000012158.4:p.Phe2308_Asp2309insPro	-1	VGNC		ENSCAFP00000012158
G1	Indel.LOH	16:47445471-47445471	GGG	ENSCAFG00000008123	ENSCAFT00000045575.3	ENSCAFT00000045575	Transcript	inframe_insertion	6872-6873	6872-6873	2291	F/FP	ttt/ttCCCt	-	MODERATE	TENM3	protein_coding	EXON=27/28		ENSCAFT00000045575.3:c.6872_6873insCCC	ENSCAFP00000036175.2:p.Phe2291_Asp2292insPro	-1	VGNC		ENSCAFP00000036175
G1	Indel.LOH	16:47445471-47445471	GGG	ENSCAFG00000008123	ENSCAFT00000075147.1	ENSCAFT00000075147	Transcript	inframe_insertion	8221-8222	7292-7293	2431	F/FP	ttt/ttCCCt	-	MODERATE	TENM3	protein_coding	EXON=27/28		ENSCAFT00000075147.1:c.7292_7293insCCC	ENSCAFP00000057075.1:p.Phe2431_Asp2432insPro	-1	VGNC		ENSCAFP00000057075
G1	Indel.LOH	16:47445471-47445471	GGG	ENSCAFG00000008123	ENSCAFT00000074812.1	ENSCAFT00000074812	Transcript	inframe_insertion	6890-6891	6890-6891	2297	F/FP	ttt/ttCCCt	-	MODERATE	TENM3	protein_coding	EXON=28/29		ENSCAFT00000074812.1:c.6890_6891insCCC	ENSCAFP00000061099.1:p.Phe2297_Asp2298insPro	-1	VGNC		ENSCAFP00000061099
G1	Indel.LOH	16:47445530-47445531	-	ENSCAFG00000008123	ENSCAFT00000013138.4	ENSCAFT00000013138	Transcript	frameshift_variant	6864	6864	2288	W/X	tgG/tg	-	HIGH	TENM3	protein_coding	EXON=25/26		ENSCAFT00000013138.4:c.6864del	ENSCAFP00000012158.4:p.Trp2288CysfsTer3	-1	VGNC		ENSCAFP00000012158
G1	Indel.LOH	16:47445530-47445531	-	ENSCAFG00000008123	ENSCAFT00000045575.3	ENSCAFT00000045575	Transcript	frameshift_variant	6813	6813	2271	W/X	tgG/tg	-	HIGH	TENM3	protein_coding	EXON=27/28		ENSCAFT00000045575.3:c.6813del	ENSCAFP00000036175.2:p.Trp2271CysfsTer3	-1	VGNC		ENSCAFP00000036175
G1	Indel.LOH	16:47445530-47445531	-	ENSCAFG00000008123	ENSCAFT00000075147.1	ENSCAFT00000075147	Transcript	frameshift_variant	8162	7233	2411	W/X	tgG/tg	-	HIGH	TENM3	protein_coding	EXON=27/28		ENSCAFT00000075147.1:c.7233del	ENSCAFP00000057075.1:p.Trp2411CysfsTer3	-1	VGNC		ENSCAFP00000057075
G1	Indel.LOH	16:47445530-47445531	-	ENSCAFG00000008123	ENSCAFT00000074812.1	ENSCAFT00000074812	Transcript	frameshift_variant	6831	6831	2277	W/X	tgG/tg	-	HIGH	TENM3	protein_coding	EXON=28/29		ENSCAFT00000074812.1:c.6831del	ENSCAFP00000061099.1:p.Trp2277CysfsTer3	-1	VGNC		ENSCAFP00000061099
G1	Indel.Somatic	16:53267017-53267033	-	ENSCAFG00000025347	ENSCAFT00000039350.3	ENSCAFT00000039350	Transcript	frameshift_variant,start_lost	43878	43878	43836	PPHTLT/X	cCTCCCCACACCCTCACg/cg	-	HIGH	SPCS3	protein_coding	EXON=1/5		ENSCAFT00000039350.3:c.2_17del	ENSCAFP00000035192.3:p.Pro1_?6	-1	VGNC		ENSCAFP00000035192
G1	Indel.LOH	17:64110275-64110275	T	ENSCAFG00000032137	ENSCAFT00000089688.1	ENSCAFT00000089688	Transcript	frameshift_variant	630-631	56-57	19	K/KX	aag/aaAg	rs851385547	HIGH		protein_coding	EXON=1/7		ENSCAFT00000089688.1:c.56dup	ENSCAFP00000051255.1:p.Lys20GlufsTer9	-1			ENSCAFP00000051255
G1	Indel.LOH	17:64236629-64236640	-	ENSCAFG00000046692	ENSCAFT00000065354.1	ENSCAFT00000065354	Transcript	frameshift_variant	1496-1506	913-923	305-308	SQAV/X	TCCCAGGCAGTc/c	-	HIGH		protein_coding	EXON=3/3		ENSCAFT00000065354.1:c.913_923del	ENSCAFP00000053015.1:p.Ser305HisfsTer58	-1			ENSCAFP00000053015
G1	Indel.LOH	17:64238612-64238613	-	ENSCAFG00000046692	ENSCAFT00000065354.1	ENSCAFT00000065354	Transcript	frameshift_variant	877	294	98	G/X	ggC/gg	-	HIGH		protein_coding	EXON=2/3		ENSCAFT00000065354.1:c.294del	ENSCAFP00000053015.1:p.Ile99LeufsTer3	-1			ENSCAFP00000053015
G1	Indel.LOH	17:64238678-64238679	-	ENSCAFG00000046692	ENSCAFT00000065354.1	ENSCAFT00000065354	Transcript	frameshift_variant	811	228	76	R/X	cgG/cg	-	HIGH		protein_coding	EXON=2/3		ENSCAFT00000065354.1:c.228del	ENSCAFP00000053015.1:p.Thr77HisfsTer25	-1			ENSCAFP00000053015
G1	Indel.LOH	19:11838633-11838636	-	ENSCAFG00000044049	ENSCAFT00000082374.1	ENSCAFT00000082374	Transcript	inframe_deletion	1399-1401	1399-1401	467	I/-	ATC/-	-	MODERATE		protein_coding	EXON=1/1		ENSCAFT00000082374.1:c.1401_1403del	ENSCAFP00000051104.1:p.Ile468del	1			ENSCAFP00000051104	2
G1	Indel.Somatic	2:19671584-19671586	-	ENSCAFG00000004529	ENSCAFT00000088846.1	ENSCAFT00000088846	Transcript	frameshift_variant	1462-1463	1325-1326	442	R/X	aGA/a	-	HIGH	VIM	protein_coding	EXON=7/7		ENSCAFT00000088846.1:c.1325_1326del	ENSCAFP00000044531.1:p.Arg442LysfsTer5	-1	VGNC		ENSCAFP00000044531
G1	Indel.LOH	2:7954156-7954157	-	ENSCAFG00000046980	ENSCAFT00000071644.1	ENSCAFT00000071644	Transcript	frameshift_variant	1162	717	239	Q/X	caG/ca	-	HIGH		protein_coding	EXON=1/1		ENSCAFT00000071644.1:c.718del	ENSCAFP00000054009.1:p.Asp240IlefsTer6	1			ENSCAFP00000054009	1
G1	Indel.Somatic	20:41712352-41712352	G	ENSCAFG00000013392	ENSCAFT00000021260.4	ENSCAFT00000021260	Transcript	frameshift_variant	2642-2643	2642-2643	881	Q/QX	cag/caGg	-	HIGH	SETD2	protein_coding	EXON=3/21		ENSCAFT00000021260.4:c.2643dup	ENSCAFP00000019740.3:p.Ser882GlufsTer31	1	VGNC		ENSCAFP00000019740	1
G1	Indel.Somatic	20:41712352-41712352	G	ENSCAFG00000013392	ENSCAFT00000060515.1	ENSCAFT00000060515	Transcript	frameshift_variant	2642-2643	2642-2643	881	Q/QX	cag/caGg	-	HIGH	SETD2	protein_coding	EXON=3/19		ENSCAFT00000060515.1:c.2643dup	ENSCAFP00000050670.1:p.Ser882GlufsTer31	1	VGNC		ENSCAFP00000050670	1
G1	Indel.Somatic	20:41712352-41712352	G	ENSCAFG00000013392	ENSCAFT00000089264.1	ENSCAFT00000089264	Transcript	frameshift_variant	2642-2643	2642-2643	881	Q/QX	cag/caGg	-	HIGH	SETD2	protein_coding	EXON=3/21		ENSCAFT00000089264.1:c.2643dup	ENSCAFP00000050746.1:p.Ser882GlufsTer31	1	VGNC		ENSCAFP00000050746	1
G1	Indel.Somatic	20:41712352-41712352	G	ENSCAFG00000013392	ENSCAFT00000077709.1	ENSCAFT00000077709	Transcript	frameshift_variant	2642-2643	2642-2643	881	Q/QX	cag/caGg	-	HIGH	SETD2	protein_coding	EXON=3/21		ENSCAFT00000077709.1:c.2643dup	ENSCAFP00000061835.1:p.Ser882GlufsTer31	1	VGNC		ENSCAFP00000061835	1
G1	Indel.Somatic	20:41712352-41712352	G	ENSCAFG00000013392	ENSCAFT00000072365.1	ENSCAFT00000072365	Transcript	frameshift_variant	2642-2643	2642-2643	881	Q/QX	cag/caGg	-	HIGH	SETD2	protein_coding	EXON=3/20		ENSCAFT00000072365.1:c.2643dup	ENSCAFP00000062565.1:p.Ser882GlufsTer31	1	VGNC		ENSCAFP00000062565	1
G1	Indel.Somatic	20:41712352-41712352	G	ENSCAFG00000013392	ENSCAFT00000064752.1	ENSCAFT00000064752	Transcript	frameshift_variant	2642-2643	2642-2643	881	Q/QX	cag/caGg	-	HIGH	SETD2	protein_coding	EXON=3/20		ENSCAFT00000064752.1:c.2643dup	ENSCAFP00000063609.1:p.Ser882GlufsTer31	1	VGNC		ENSCAFP00000063609	1
G1	Indel.Somatic	20:41712352-41712352	G	ENSCAFG00000013392	ENSCAFT00000071377.1	ENSCAFT00000071377	Transcript	frameshift_variant	2642-2643	2642-2643	881	Q/QX	cag/caGg	-	HIGH	SETD2	protein_coding	EXON=3/20		ENSCAFT00000071377.1:c.2643dup	ENSCAFP00000066624.1:p.Ser882GlufsTer31	1	VGNC		ENSCAFP00000066624	1
G1	Indel.LOH	20:50958383-50958383	GGCGGGCCCGGG	ENSCAFG00000017920	ENSCAFT00000028437.5	ENSCAFT00000028437	Transcript	inframe_insertion	1010-1011	1010-1011	337	E/EAGPG	gag/gaGGCGGGCCCGGGg	-	MODERATE	ANGPTL6	protein_coding	EXON=3/7		ENSCAFT00000028437.5:c.1017_1028dup	ENSCAFP00000026447.5:p.Ala342_Gly345dup	1	VGNC		ENSCAFP00000026447	18
G1	Indel.LOH	20:8332662-8332662	CCCCGC	ENSCAFG00000005211	ENSCAFT00000008401.5	ENSCAFT00000008401	Transcript	inframe_insertion	2933-2934	2876-2877	959	G/GPA	ggc/ggCCCCGCc	-	MODERATE	PRRT3	protein_coding	EXON=3/3		ENSCAFT00000008401.5:c.2877_2882dup	ENSCAFP00000007784.4:p.Pro960_Ala961dup	1	VGNC		ENSCAFP00000007784	6
G1	Indel.LOH	22:6375934-6375940	-	ENSCAFG00000004584	ENSCAFT00000007397.6	ENSCAFT00000007397	Transcript	inframe_deletion	359-364	101-106	34-36	SGG/S	aGCGGCGgc/agc	-	MODERATE	TSC22D1	protein_coding	EXON=1/3		ENSCAFT00000007397.6:c.134_139del	ENSCAFP00000006854.4:p.Gly45_Gly46del	1	VGNC		ENSCAFP00000006854	33
G1	Indel.LOH	22:6375934-6375940	-	ENSCAFG00000004584	ENSCAFT00000050068.2	ENSCAFT00000050068	Transcript	inframe_deletion	359-364	101-106	34-36	SGG/S	aGCGGCGgc/agc	-	MODERATE	TSC22D1	protein_coding	EXON=1/3		ENSCAFT00000050068.2:c.134_139del	ENSCAFP00000038598.2:p.Gly45_Gly46del	1	VGNC		ENSCAFP00000038598	33
G1	Indel.LOH	22:6375934-6375940	-	ENSCAFG00000004584	ENSCAFT00000074715.1	ENSCAFT00000074715	Transcript	inframe_deletion	359-364	101-106	34-36	SGG/S	aGCGGCGgc/agc	-	MODERATE	TSC22D1	protein_coding	EXON=1/2		ENSCAFT00000074715.1:c.134_139del	ENSCAFP00000048814.1:p.Gly45_Gly46del	1	VGNC		ENSCAFP00000048814	33
G1	Indel.LOH	22:6375934-6375940	-	ENSCAFG00000004584	ENSCAFT00000082931.1	ENSCAFT00000082931	Transcript	inframe_deletion	359-364	101-106	34-36	SGG/S	aGCGGCGgc/agc	-	MODERATE	TSC22D1	protein_coding	EXON=1/2		ENSCAFT00000082931.1:c.134_139del	ENSCAFP00000062761.1:p.Gly45_Gly46del	1	VGNC		ENSCAFP00000062761	33
G1	Indel.Somatic	23:34721100-34721101	-	ENSCAFG00000045615	ENSCAFT00000082194.1	ENSCAFT00000082194	Transcript	frameshift_variant	689	689	230	T/X	aCc/ac	-	HIGH		protein_coding	EXON=1/1		ENSCAFT00000082194.1:c.690del	ENSCAFP00000056830.1:p.Lys231ArgfsTer7	1			ENSCAFP00000056830	1
G1	Indel.LOH	24:17409600-17409600	A	ENSCAFG00000007483	ENSCAFT00000011982.3	ENSCAFT00000011982	Transcript	frameshift_variant	164-165	164-165	55	V/VX	gtc/gtTc	-	HIGH		protein_coding	EXON=1/1		ENSCAFT00000011982.3:c.164dup	ENSCAFP00000056481.1:p.Lys56GlnfsTer7	-1			ENSCAFP00000056481
G1	Indel.LOH	24:17409664-17409666	-	ENSCAFG00000007483	ENSCAFT00000011982.3	ENSCAFT00000011982	Transcript	frameshift_variant	99-100	99-100	33-34	RV/SX	agGGtt/agtt	-	HIGH		protein_coding	EXON=1/1		ENSCAFT00000011982.3:c.99_100del	ENSCAFP00000056481.1:p.Arg33SerfsTer2	-1			ENSCAFP00000056481
G1	Indel.LOH	24:22096444-22096444	G	ENSCAFG00000007268	ENSCAFT00000011678.5	ENSCAFT00000011678	Transcript	frameshift_variant	96-97	96-97	32-33	-/X	-/G	rs850958597	HIGH	DNMT3B	protein_coding	EXON=1/21		ENSCAFT00000011678.5:c.98dup	ENSCAFP00000010821.4:p.Gly34ArgfsTer7	1	VGNC		ENSCAFP00000010821	2
G1	Indel.LOH	27:1968639-1968640	-	ENSCAFG00000007050	ENSCAFT00000065272.1	ENSCAFT00000065272	Transcript	frameshift_variant	206	131	44	R/X	cGg/cg	-	HIGH	RARG	protein_coding	EXON=1/9		ENSCAFT00000065272.1:c.143del	ENSCAFP00000063171.1:p.Gly48AlafsTer124	1	VGNC		ENSCAFP00000063171	12
G1	Indel.LOH	27:22536216-22536216	CCGCCGCCGCCG	ENSCAFG00000011487	ENSCAFT00000077668.1	ENSCAFT00000077668	Transcript	inframe_insertion	963-964	94-95	32	P/PAAAA	ccc/cCCGCCGCCGCCGcc	-	MODERATE	BCAT1	protein_coding	EXON=1/10		ENSCAFT00000077668.1:c.97_108dup	ENSCAFP00000049579.1:p.Ala33_Ala36dup	1	VGNC		ENSCAFP00000049579	14
G1	Indel.LOH	27:22536216-22536216	CCGCCGCCGCCG	ENSCAFG00000011487	ENSCAFT00000088004.1	ENSCAFT00000088004	Transcript	inframe_insertion	963-964	94-95	32	P/PAAAA	ccc/cCCGCCGCCGCCGcc	-	MODERATE	BCAT1	protein_coding	EXON=1/11		ENSCAFT00000088004.1:c.97_108dup	ENSCAFP00000059422.1:p.Ala33_Ala36dup	1	VGNC		ENSCAFP00000059422	14
G1	Indel.LOH	27:22536216-22536216	CCGCCGCCGCCG	ENSCAFG00000011487	ENSCAFT00000086203.1	ENSCAFT00000086203	Transcript	inframe_insertion	963-964	94-95	32	P/PAAAA	ccc/cCCGCCGCCGCCGcc	-	MODERATE	BCAT1	protein_coding	EXON=1/11		ENSCAFT00000086203.1:c.97_108dup	ENSCAFP00000064511.1:p.Ala33_Ala36dup	1	VGNC		ENSCAFP00000064511	14
G1	Indel.LOH	27:22536216-22536216	CCGCCGCCGCCG	ENSCAFG00000011487	ENSCAFT00000074750.1	ENSCAFT00000074750	Transcript	inframe_insertion	963-964	94-95	32	P/PAAAA	ccc/cCCGCCGCCGCCGcc	-	MODERATE	BCAT1	protein_coding	EXON=1/12		ENSCAFT00000074750.1:c.97_108dup	ENSCAFP00000064687.1:p.Ala33_Ala36dup	1	VGNC		ENSCAFP00000064687	14
G1	Indel.LOH	28:16267084-16267084	ATGATG	ENSCAFG00000010495	ENSCAFT00000016672.2	ENSCAFT00000016672	Transcript	inframe_insertion	670-671	670-671	224	Y/YDD	tat/tATGATGat	-	MODERATE		protein_coding	EXON=1/1		ENSCAFT00000016672.2:c.680_685dup	ENSCAFP00000042397.1:p.Asp227_Asp228dup	1			ENSCAFP00000042397	15
G1	Indel.LOH	28:25898521-25898521	C	ENSCAFG00000044426	ENSCAFT00000063312.1	ENSCAFT00000063312	Transcript	frameshift_variant	2009-2010	2009-2010	670	I/MX	ata/atGa	-	HIGH		protein_coding	EXON=1/1		ENSCAFT00000063312.1:c.2009_2010insG	ENSCAFP00000043481.1:p.Ile670MetfsTer17	-1			ENSCAFP00000043481
G1	Indel.Somatic	28:26298469-26298469	TTGAAA	ENSCAFG00000047532	ENSCAFT00000092409.1	ENSCAFT00000092409	Transcript	inframe_insertion	586-587	586-587	196	S/ISS	agt/aTTTCAAgt	-	MODERATE		protein_coding	EXON=1/1		ENSCAFT00000092409.1:c.586_587insTTTCAA	ENSCAFP00000052206.1:p.Ser195_Ser196insIleSer	-1			ENSCAFP00000052206
G1	Indel.LOH	28:40918705-40918705	G	ENSCAFG00000013427	ENSCAFT00000072173.1	ENSCAFT00000072173	Transcript	frameshift_variant	952-953	890-891	297	G/GX	ggg/ggCg	-	HIGH	CALY	protein_coding	EXON=4/4		ENSCAFT00000072173.1:c.890_891insC	ENSCAFP00000046215.1:p.Pro298AlafsTer?	-1	VGNC		ENSCAFP00000046215
G1	Indel.LOH	29:31812489-31812490	-	ENSCAFG00000046614	ENSCAFT00000063565.1	ENSCAFT00000063565	Transcript	frameshift_variant	1631	1631	544	N/X	aAt/at	-	HIGH		protein_coding	EXON=1/1		ENSCAFT00000063565.1:c.1631del	ENSCAFP00000044062.1:p.Asn544IlefsTer7	-1			ENSCAFP00000044062
G1	Indel.LOH	30:7641439-7641439	CGCCGCCCGCCGCCCGCCGCCCGCC	ENSCAFG00000009145	ENSCAFT00000046119.2	ENSCAFT00000046119	Transcript	frameshift_variant	803-804	803-804	268	L/LAARRPPPAX	ctc/ctCGCCGCCCGCCGCCCGCCGCCCGCCc	-	HIGH	CHST14	protein_coding	EXON=1/1		ENSCAFT00000046119.2:c.822_846dup	ENSCAFP00000042581.2:p.Arg283AlafsTer109	1	VGNC		ENSCAFP00000042581	43
G1	Indel.Somatic	4:35161384-35161385	-	ENSCAFG00000023521	ENSCAFT00000026599.4	ENSCAFT00000026599	Transcript	frameshift_variant	280	271	91	R/X	Agg/gg	-	HIGH		protein_coding	EXON=3/3		ENSCAFT00000026599.4:c.271del	ENSCAFP00000024705.4:p.Arg91GlyfsTer136	-1			ENSCAFP00000024705
G1	Indel.LOH	4:4209601-4209607	-	ENSCAFG00000046984	ENSCAFT00000069564.1	ENSCAFT00000069564	Transcript	inframe_deletion	3055-3060	3055-3060	1019-1020	FC/-	TTTTGC/-	-	MODERATE		protein_coding	EXON=1/1		ENSCAFT00000069564.1:c.3055_3060del	ENSCAFP00000051995.1:p.Phe1019_Cys1020del	-1			ENSCAFP00000051995
G1	Indel.LOH	5:20515745-20515745	C	ENSCAFG00000044067	ENSCAFT00000078242.1	ENSCAFT00000078242	Transcript	frameshift_variant,stop_retained_variant	1990-1991	1990-1991	664	*	tag/tGag	-	HIGH		protein_coding	EXON=1/1		ENSCAFT00000078242.1:c.1990_1991insG	ENSCAFP00000065455.1:p.Ter664%3D	-1			ENSCAFP00000065455
G1	Indel.Somatic	5:32563439-32563439	TAGTCAACTATAG	ENSCAFG00000016714	ENSCAFT00000026465.4	ENSCAFT00000026465	Transcript	frameshift_variant	814-815	658-659	220	I/TIVDYX	atc/aCTATAGTTGACTAtc	-	HIGH	TP53	protein_coding	EXON=7/11		ENSCAFT00000026465.4:c.658_659insCTATAGTTGACTA	ENSCAFP00000024579.4:p.Ile220ThrfsTer12	-1	VGNC		ENSCAFP00000024579
G1	Indel.Somatic	5:32563439-32563439	TAGTCAACTATAG	ENSCAFG00000016714	ENSCAFT00000086831.1	ENSCAFT00000086831	Transcript	frameshift_variant	589-590	589-590	197	I/TIVDYX	atc/aCTATAGTTGACTAtc	-	HIGH	TP53	protein_coding	EXON=5/9		ENSCAFT00000086831.1:c.589_590insCTATAGTTGACTA	ENSCAFP00000060472.1:p.Ile197ThrfsTer12	-1	VGNC		ENSCAFP00000060472
G1	Indel.Somatic	5:32563439-32563439	TAGTCAACTATAG	ENSCAFG00000016714	ENSCAFT00000081814.1	ENSCAFT00000081814	Transcript	frameshift_variant	850-851	850-851	284	I/TIVDYX	atc/aCTATAGTTGACTAtc	-	HIGH	TP53	protein_coding	EXON=7/11		ENSCAFT00000081814.1:c.850_851insCTATAGTTGACTA	ENSCAFP00000064590.1:p.Ile284ThrfsTer12	-1	VGNC		ENSCAFP00000064590
G1	Indel.LOH	5:33075912-33075913	-	ENSCAFG00000017021	ENSCAFT00000077383.1	ENSCAFT00000077383	Transcript	frameshift_variant	3787	3747	1249	G/X	ggA/gg	-	HIGH	PFAS	protein_coding	EXON=26/26		ENSCAFT00000077383.1:c.3748del	ENSCAFP00000064819.1:p.Thr1250ProfsTer53	1	VGNC		ENSCAFP00000064819	1
G1	Indel.LOH	5:46139570-46139570	A	ENSCAFG00000045334	ENSCAFT00000081394.1	ENSCAFT00000081394	Transcript	frameshift_variant	723-724	723-724	241-242	-/X	-/A	-	HIGH		protein_coding	EXON=1/1		ENSCAFT00000081394.1:c.724dup	ENSCAFP00000056084.1:p.Ile242AsnfsTer17	1			ENSCAFP00000056084	1
G1	Indel.LOH	6:5695120-5695120	TGCGGG	ENSCAFG00000042528	ENSCAFT00000082910.1	ENSCAFT00000082910	Transcript	inframe_insertion	1256-1257	1251-1252	417-418	-/CG	-/TGCGGG	rs852991740	MODERATE		protein_coding	EXON=14/14		ENSCAFT00000082910.1:c.1261_1266dup	ENSCAFP00000063307.1:p.Gly421_Cys422dup	1			ENSCAFP00000063307	15
G1	Indel.LOH	7:29257443-29257445	-	ENSCAFG00000015252	ENSCAFT00000024207.4	ENSCAFT00000024207	Transcript	frameshift_variant	111-112	31-32	11	A/X	GCa/a	-	HIGH	NME7	protein_coding	EXON=2/12		ENSCAFT00000024207.4:c.31_32del	ENSCAFP00000022471.4:p.Ala11ArgfsTer4	1	VGNC		ENSCAFP00000022471
G1	Indel.LOH	7:29258375-29258378	-	ENSCAFG00000015252	ENSCAFT00000024207.4	ENSCAFT00000024207	Transcript	inframe_deletion	291-293	211-213	71	R/-	CGA/-	-	MODERATE	NME7	protein_coding	EXON=3/12		ENSCAFT00000024207.4:c.212_214del	ENSCAFP00000022471.4:p.Arg71del	1	VGNC		ENSCAFP00000022471	1
G1	Indel.LOH	7:29272928-29272932	-	ENSCAFG00000015252	ENSCAFT00000024207.4	ENSCAFT00000024207	Transcript	frameshift_variant	419-422	339-342	113-114	IN/X	atAAAC/at	-	HIGH	NME7	protein_coding	EXON=4/12		ENSCAFT00000024207.4:c.342_345del	ENSCAFP00000022471.4:p.Asn114LysfsTer6	1	VGNC		ENSCAFP00000022471	3
G1	Indel.Somatic	7:73520226-73520227	-	ENSCAFG00000024483	ENSCAFT00000037790.3	ENSCAFT00000037790	Transcript	frameshift_variant	1219	1219	407	E/X	Gag/ag	-	HIGH		protein_coding	EXON=1/1		ENSCAFT00000037790.3:c.1219del	ENSCAFP00000063643.1:p.Glu407ArgfsTer?	1			ENSCAFP00000063643
G1	Indel.LOH	8:2606481-2606484	-	ENSCAFG00000049008	ENSCAFT00000072970.1	ENSCAFT00000072970	Transcript	inframe_deletion	145-147	145-147	49	K/-	AAG/-	-	MODERATE		protein_coding	EXON=1/1		ENSCAFT00000072970.1:c.145_147del	ENSCAFP00000060186.1:p.Lys49del	-1			ENSCAFP00000060186
G1	Indel.LOH	8:31109087-31109087	CCGCCGCCGCCG	ENSCAFG00000015040	ENSCAFT00000023871.4	ENSCAFT00000023871	Transcript	inframe_insertion	84-85	84-85	28-29	-/PPPP	-/CCGCCGCCGCCG	-	MODERATE	FBXO34	protein_coding	EXON=1/2		ENSCAFT00000023871.4:c.95_106dup	ENSCAFP00000040852.1:p.Pro32_Pro35dup	1	VGNC		ENSCAFP00000040852	22
G1	Indel.Somatic	8:73886104-73886105	-	ENSCAFG00000043363	ENSCAFT00000050006.2	ENSCAFT00000050006	Transcript	frameshift_variant	293	293	98	K/X	aAg/ag	-	HIGH		IG_V_gene	EXON=1/1		ENSCAFT00000050006.2:c.293del	ENSCAFP00000038803.2:p.Lys98ArgfsTer?	-1			ENSCAFP00000038803
G1	Indel.LOH	8:74242682-74242683	-	ENSCAFG00000043645	ENSCAFT00000071153.1	ENSCAFT00000071153	Transcript	frameshift_variant	208	144	48	F/X	ttC/tt	-	HIGH		protein_coding	EXON=2/2		ENSCAFT00000071153.1:c.144del	ENSCAFP00000054037.1:p.Phe48LeufsTer36	-1			ENSCAFP00000054037
G1	Indel.LOH	8:9085974-9085975	-	ENSCAFG00000048455	ENSCAFT00000081560.1	ENSCAFT00000081560	Transcript	frameshift_variant	1829	1829	610	W/X	tGg/tg	-	HIGH		protein_coding	EXON=1/1		ENSCAFT00000081560.1:c.1831del	ENSCAFP00000066675.1:p.Glu611AsnfsTer19	1			ENSCAFP00000066675	2
G1	Indel.Somatic	9:2369722-2369722	C	ENSCAFG00000005547	ENSCAFT00000008934.4	ENSCAFT00000008934	Transcript	frameshift_variant	506-507	506-507	169	Y/YX	tac/taCc	-	HIGH	RBFOX3	protein_coding	EXON=5/8		ENSCAFT00000008934.4:c.510dup	ENSCAFP00000008287.4:p.Thr171HisfsTer22	1	VGNC		ENSCAFP00000008287	4
G1	Indel.Somatic	9:2369722-2369722	C	ENSCAFG00000005547	ENSCAFT00000046179.3	ENSCAFT00000046179	Transcript	frameshift_variant	599-600	599-600	200	Y/YX	tac/taCc	-	HIGH	RBFOX3	protein_coding	EXON=6/9		ENSCAFT00000046179.3:c.603dup	ENSCAFP00000042800.2:p.Thr202HisfsTer22	1	VGNC		ENSCAFP00000042800	4
G1	Indel.Somatic	9:2369722-2369722	C	ENSCAFG00000005547	ENSCAFT00000060131.1	ENSCAFT00000060131	Transcript	frameshift_variant	599-600	599-600	200	Y/YX	tac/taCc	-	HIGH	RBFOX3	protein_coding	EXON=6/8		ENSCAFT00000060131.1:c.603dup	ENSCAFP00000064826.1:p.Thr202HisfsTer22	1	VGNC		ENSCAFP00000064826	4
G1	Indel.LOH	9:41498934-41498935	-	ENSCAFG00000044172	ENSCAFT00000069816.1	ENSCAFT00000069816	Transcript	frameshift_variant	1839	1839	613	I/X	atC/at	-	HIGH		protein_coding	EXON=1/1		ENSCAFT00000069816.1:c.1839del	ENSCAFP00000059853.1:p.Thr615LeufsTer5	1			ENSCAFP00000059853
G1	Indel.LOH	9:41499100-41499100	A	ENSCAFG00000044172	ENSCAFT00000069816.1	ENSCAFT00000069816	Transcript	frameshift_variant	2004-2005	2004-2005	668-669	-/X	-/A	-	HIGH		protein_coding	EXON=1/1		ENSCAFT00000069816.1:c.2005dup	ENSCAFP00000059853.1:p.Ile669AsnfsTer17	1			ENSCAFP00000059853	1
G1	Indel.LOH	9:60314642-60314654	-	ENSCAFG00000032643	ENSCAFT00000043300.3	ENSCAFT00000043300	Transcript	inframe_deletion	211-222	211-222	71-74	NAGP/-	AACGCAGGCCCC/-	-	MODERATE	MRRF	protein_coding	EXON=1/7		ENSCAFT00000043300.3:c.211_222del	ENSCAFP00000039641.2:p.Asn71_Pro74del	-1	VGNC		ENSCAFP00000039641
G1	Indel.LOH	9:60314642-60314654	-	ENSCAFG00000032643	ENSCAFT00000075911.1	ENSCAFT00000075911	Transcript	inframe_deletion	211-222	211-222	71-74	NAGP/-	AACGCAGGCCCC/-	-	MODERATE	MRRF	protein_coding	EXON=1/7		ENSCAFT00000075911.1:c.211_222del	ENSCAFP00000060290.1:p.Asn71_Pro74del	-1	VGNC		ENSCAFP00000060290
G3	Indel.Somatic	1:103182941-103182941	C	ENSCAFG00000028940	ENSCAFT00000004229.4	ENSCAFT00000004229	Transcript	frameshift_variant	963-964	667-668	223	D/GX	gat/gGat	-	HIGH		protein_coding	EXON=5/6		ENSCAFT00000004229.4:c.667dup	ENSCAFP00000003913.4:p.Asp223GlyfsTer73	-1			ENSCAFP00000003913
G3	Indel.Somatic	1:103182941-103182941	C	ENSCAFG00000028940	ENSCAFT00000044713.3	ENSCAFT00000044713	Transcript	frameshift_variant	1557-1558	646-647	216	D/GX	gat/gGat	-	HIGH		protein_coding	EXON=4/5		ENSCAFT00000044713.3:c.646dup	ENSCAFP00000041284.1:p.Asp216GlyfsTer73	-1			ENSCAFP00000041284
G3	Indel.Somatic	1:103182941-103182941	C	ENSCAFG00000028940	ENSCAFT00000090982.1	ENSCAFT00000090982	Transcript	frameshift_variant	1593-1594	682-683	228	D/GX	gat/gGat	-	HIGH		protein_coding	EXON=5/6		ENSCAFT00000090982.1:c.682dup	ENSCAFP00000059686.1:p.Asp228GlyfsTer73	-1			ENSCAFP00000059686
G3	Indel.Somatic	1:117309791-117309807	-	ENSCAFG00000007054	ENSCAFT00000093016.1	ENSCAFT00000093016	Transcript	frameshift_variant	422-437	292-307	98-103	LSPPAV/X	CTGAGCCCTCCAGCGGtg/tg	rs851957950	HIGH	USF2	protein_coding	EXON=4/6		ENSCAFT00000093016.1:c.292_307del	ENSCAFP00000056832.1:p.Leu98CysfsTer14	-1	VGNC		ENSCAFP00000056832
G3	Indel.LOH	1:31123143-31123143	GTAA	ENSCAFG00000046446	ENSCAFT00000087849.1	ENSCAFT00000087849	Transcript	stop_gained,frameshift_variant,splice_region_variant	1733-1734	1697-1698	566	R/R*X	agg/agGTAAg	-	HIGH	ECT2L	protein_coding			ENSCAFT00000087849.1:c.1697+1_1697+2insTAAG		1	HGNC	ECT2L	ENSCAFP00000056697
G3	Indel.LOH	1:71290507-71290507	A	ENSCAFG00000001246	ENSCAFT00000001978.4	ENSCAFT00000001978	Transcript	frameshift_variant	2408-2409	2408-2409	803	P/PX	cca/ccAa	rs851061836	HIGH	PTCH1	protein_coding	EXON=17/25		ENSCAFT00000001978.4:c.2410dup	ENSCAFP00000001826.4:p.Thr804AsnfsTer3	1	VGNC		ENSCAFP00000001826	2
G3	Indel.LOH	1:71290507-71290507	A	ENSCAFG00000001246	ENSCAFT00000066660.1	ENSCAFT00000066660	Transcript	frameshift_variant	2603-2604	2603-2604	868	P/PX	cca/ccAa	rs851061836	HIGH	PTCH1	protein_coding	EXON=17/25		ENSCAFT00000066660.1:c.2605dup	ENSCAFP00000053892.1:p.Thr869AsnfsTer3	1	VGNC		ENSCAFP00000053892	2
G3	Indel.LOH	1:71290507-71290507	A	ENSCAFG00000001246	ENSCAFT00000068949.1	ENSCAFT00000068949	Transcript	frameshift_variant	3444-3445	2600-2601	867	P/PX	cca/ccAa	rs851061836	HIGH	PTCH1	protein_coding	EXON=17/25		ENSCAFT00000068949.1:c.2602dup	ENSCAFP00000056559.1:p.Thr868AsnfsTer3	1	VGNC		ENSCAFP00000056559	2
G3	Indel.LOH	1:75647271-75647272	-	ENSCAFG00000049418	ENSCAFT00000083427.1	ENSCAFT00000083427	Transcript	frameshift_variant	1026	1026	342	C/X	tgC/tg	-	HIGH		protein_coding	EXON=1/1		ENSCAFT00000083427.1:c.1026del	ENSCAFP00000052768.1:p.Trp343GlyfsTer11	-1			ENSCAFP00000052768
G3	Indel.Somatic	1:75647272-75647273	-	ENSCAFG00000049418	ENSCAFT00000083427.1	ENSCAFT00000083427	Transcript	frameshift_variant	1025	1025	342	C/X	tGc/tc	-	HIGH		protein_coding	EXON=1/1		ENSCAFT00000083427.1:c.1025del	ENSCAFP00000052768.1:p.Cys342SerfsTer12	-1			ENSCAFP00000052768
G3	Indel.Somatic	1:75836916-75836917	-	ENSCAFG00000029948	ENSCAFT00000043618.2	ENSCAFT00000043618	Transcript	frameshift_variant	253	253	85	R/X	Agg/gg	-	HIGH	IDNK	protein_coding	EXON=1/6		ENSCAFT00000043618.2:c.253del	ENSCAFP00000042334.2:p.Arg85GlyfsTer65	-1	VGNC		ENSCAFP00000042334
G3	Indel.Somatic	1:75836916-75836917	-	ENSCAFG00000029948	ENSCAFT00000063603.1	ENSCAFT00000063603	Transcript	frameshift_variant	253	253	85	R/X	Agg/gg	-	HIGH	IDNK	protein_coding	EXON=1/6		ENSCAFT00000063603.1:c.253del	ENSCAFP00000046786.1:p.Arg85GlyfsTer98	-1	VGNC		ENSCAFP00000046786
G3	Indel.Somatic	1:75836916-75836917	-	ENSCAFG00000029948	ENSCAFT00000077793.1	ENSCAFT00000077793	Transcript	frameshift_variant	253	253	85	R/X	Agg/gg	-	HIGH	IDNK	protein_coding	EXON=1/4		ENSCAFT00000077793.1:c.253del	ENSCAFP00000056230.1:p.Arg85GlyfsTer64	-1	VGNC		ENSCAFP00000056230
G3	Indel.Somatic	1:75836916-75836917	-	ENSCAFG00000029948	ENSCAFT00000062052.1	ENSCAFT00000062052	Transcript	frameshift_variant	253	253	85	R/X	Agg/gg	-	HIGH	IDNK	protein_coding	EXON=1/3		ENSCAFT00000062052.1:c.253del	ENSCAFP00000059892.1:p.Arg85GlyfsTer77	-1	VGNC		ENSCAFP00000059892
G3	Indel.Somatic	1:75836916-75836917	-	ENSCAFG00000029948	ENSCAFT00000075263.1	ENSCAFT00000075263	Transcript	frameshift_variant	253	253	85	R/X	Agg/gg	-	HIGH	IDNK	protein_coding	EXON=1/7		ENSCAFT00000075263.1:c.253del	ENSCAFP00000061018.1:p.Arg85GlyfsTer65	-1	VGNC		ENSCAFP00000061018
G3	Indel.Somatic	10:68162194-68162195	-	ENSCAFG00000003309	ENSCAFT00000047415.2	ENSCAFT00000047415	Transcript	frameshift_variant	1162	262	88	S/X	Agc/gc	rs853051466	HIGH	AAK1	protein_coding	EXON=1/7		ENSCAFT00000047415.2:c.262del	ENSCAFP00000038108.2:p.Ser88AlafsTer123	-1	VGNC		ENSCAFP00000038108
G3	Indel.Somatic	10:69327672-69327673	-	ENSCAFG00000045296	ENSCAFT00000083370.1	ENSCAFT00000083370	Transcript	frameshift_variant	362	362	121	P/X	cCt/ct	-	HIGH		protein_coding	EXON=1/2		ENSCAFT00000083370.1:c.362del	ENSCAFP00000048682.1:p.Pro121LeufsTer65	-1			ENSCAFP00000048682
G3	Indel.LOH	11:68699669-68699675	-	ENSCAFG00000003344	ENSCAFT00000005356.5	ENSCAFT00000005356	Transcript	inframe_deletion	303-308	117-122	39-41	GAG/G	ggCGCGGGg/ggg	-	MODERATE	WHRN	protein_coding	EXON=1/13		ENSCAFT00000005356.5:c.117_122del	ENSCAFP00000004960.4:p.Ala40_Gly41del	-1	VGNC		ENSCAFP00000004960
G3	Indel.LOH	11:68699669-68699675	-	ENSCAFG00000003344	ENSCAFT00000083752.1	ENSCAFT00000083752	Transcript	inframe_deletion	303-308	117-122	39-41	GAG/G	ggCGCGGGg/ggg	-	MODERATE	WHRN	protein_coding	EXON=1/12		ENSCAFT00000083752.1:c.117_122del	ENSCAFP00000062330.1:p.Ala40_Gly41del	-1	VGNC		ENSCAFP00000062330
G3	Indel.Somatic	12:32443344-32443346	-	ENSCAFG00000002548	ENSCAFT00000004019.1	ENSCAFT00000004019	Transcript	frameshift_variant	190-191	190-191	64	S/X	AGc/c	-	HIGH		protein_coding	EXON=1/1		ENSCAFT00000004019.1:c.190_191del	ENSCAFP00000042746.1:p.Ser64ArgfsTer8	-1			ENSCAFP00000042746
G3	Indel.Somatic	12:66360479-66360480	-	ENSCAFG00000003824	ENSCAFT00000006147.4	ENSCAFT00000006147	Transcript	frameshift_variant	136	136	46	S/X	Tcc/cc	-	HIGH	MICAL1	protein_coding	EXON=1/23		ENSCAFT00000006147.4:c.136del	ENSCAFP00000005691.4:p.Ser46ProfsTer120	-1	VGNC		ENSCAFP00000005691
G3	Indel.Somatic	12:66360479-66360480	-	ENSCAFG00000003824	ENSCAFT00000084555.1	ENSCAFT00000084555	Transcript	frameshift_variant	136	136	46	S/X	Tcc/cc	-	HIGH	MICAL1	protein_coding	EXON=1/21		ENSCAFT00000084555.1:c.136del	ENSCAFP00000045159.1:p.Ser46ProfsTer120	-1	VGNC		ENSCAFP00000045159
G3	Indel.Somatic	12:66360479-66360480	-	ENSCAFG00000003824	ENSCAFT00000086929.1	ENSCAFT00000086929	Transcript	frameshift_variant	136	136	46	S/X	Tcc/cc	-	HIGH	MICAL1	protein_coding	EXON=1/23		ENSCAFT00000086929.1:c.136del	ENSCAFP00000062732.1:p.Ser46ProfsTer120	-1	VGNC		ENSCAFP00000062732
G3	Indel.Somatic	12:66360521-66360522	-	ENSCAFG00000003824	ENSCAFT00000006147.4	ENSCAFT00000006147	Transcript	frameshift_variant	94	94	32	S/X	Tcc/cc	-	HIGH	MICAL1	protein_coding	EXON=1/23		ENSCAFT00000006147.4:c.94del	ENSCAFP00000005691.4:p.Ser32ProfsTer134	-1	VGNC		ENSCAFP00000005691
G3	Indel.Somatic	12:66360521-66360522	-	ENSCAFG00000003824	ENSCAFT00000084555.1	ENSCAFT00000084555	Transcript	frameshift_variant	94	94	32	S/X	Tcc/cc	-	HIGH	MICAL1	protein_coding	EXON=1/21		ENSCAFT00000084555.1:c.94del	ENSCAFP00000045159.1:p.Ser32ProfsTer134	-1	VGNC		ENSCAFP00000045159
G3	Indel.Somatic	12:66360521-66360522	-	ENSCAFG00000003824	ENSCAFT00000086929.1	ENSCAFT00000086929	Transcript	frameshift_variant	94	94	32	S/X	Tcc/cc	-	HIGH	MICAL1	protein_coding	EXON=1/23		ENSCAFT00000086929.1:c.94del	ENSCAFP00000062732.1:p.Ser32ProfsTer134	-1	VGNC		ENSCAFP00000062732
G3	Indel.LOH	12:71937263-71937270	-	ENSCAFG00000023729	ENSCAFT00000036671.3	ENSCAFT00000036671	Transcript	frameshift_variant	16-22	16-22	43990	SGG/X	AGCGGGGgg/gg	-	HIGH	TSPYL1	protein_coding	EXON=1/2		ENSCAFT00000036671.3:c.16_22del	ENSCAFP00000032079.3:p.Ser6GlyfsTer120	-1	HGNC	TSPYL1	ENSCAFP00000032079
G3	Indel.Somatic	13:10880921-10880921	CAG	ENSCAFG00000043478	ENSCAFT00000068346.1	ENSCAFT00000068346	Transcript	protein_altering_variant	621-622	283-284	95	I/TV	att/aCAGtt	-	MODERATE		protein_coding	EXON=2/2		ENSCAFT00000068346.1:c.283_284insCAG	ENSCAFP00000060155.1:p.Ile95delinsThrVal	1			ENSCAFP00000060155
G3	Indel.Somatic	13:10881039-10881041	-	ENSCAFG00000043478	ENSCAFT00000068346.1	ENSCAFT00000068346	Transcript	frameshift_variant	740-741	402-403	134-135	SI/SX	agTAta/agta	rs851987696	HIGH		protein_coding	EXON=2/2		ENSCAFT00000068346.1:c.406_407del	ENSCAFP00000060155.1:p.Ter136del	1			ENSCAFP00000060155	4
G3	Indel.LOH	13:61887908-61887917	-	ENSCAFG00000002962	ENSCAFT00000004743.3	ENSCAFT00000004743	Transcript	inframe_deletion	471-479	471-479	157-160	PGGP/P	ccAGGCGGCCCt/cct	-	MODERATE	COX18	protein_coding	EXON=1/6		ENSCAFT00000004743.3:c.471_479del	ENSCAFP00000004390.3:p.Pro163_Gly165del	-1	VGNC		ENSCAFP00000004390
G3	Indel.Somatic	17:22910433-22910434	-	ENSCAFG00000023626	ENSCAFT00000036452.3	ENSCAFT00000036452	Transcript	frameshift_variant	206	104	35	G/X	gGc/gc	-	HIGH	PCARE	protein_coding	EXON=1/2		ENSCAFT00000036452.3:c.104del	ENSCAFP00000031832.3:p.Gly35AlafsTer113	-1	VGNC		ENSCAFP00000031832
G3	Indel.Somatic	17:22910433-22910434	-	ENSCAFG00000023626	ENSCAFT00000071574.1	ENSCAFT00000071574	Transcript	frameshift_variant	206	104	35	G/X	gGc/gc	-	HIGH	PCARE	protein_coding	EXON=1/3		ENSCAFT00000071574.1:c.104del	ENSCAFP00000049531.1:p.Gly35AlafsTer113	-1	VGNC		ENSCAFP00000049531
G3	Indel.LOH	17:35000873-35000875	-	ENSCAFG00000007047	ENSCAFT00000092846.1	ENSCAFT00000092846	Transcript	frameshift_variant	475-476	86-87	29	G/X	gGG/g	-	HIGH	MAL	protein_coding	EXON=1/4		ENSCAFT00000092846.1:c.86_87del	ENSCAFP00000050507.1:p.Gly29AlafsTer76	-1	VGNC		ENSCAFP00000050507
G3	Indel.Somatic	17:35000879-35000881	-	ENSCAFG00000007047	ENSCAFT00000092846.1	ENSCAFT00000092846	Transcript	frameshift_variant	469-470	80-81	27	A/X	gCG/g	-	HIGH	MAL	protein_coding	EXON=1/4		ENSCAFT00000092846.1:c.80_81del	ENSCAFP00000050507.1:p.Ala27GlyfsTer78	-1	VGNC		ENSCAFP00000050507
G3	Indel.Somatic	17:53216419-53216421	-	ENSCAFG00000009758	ENSCAFT00000035308.3	ENSCAFT00000035308	Transcript	frameshift_variant	1371-1372	1146-1147	382-383	KA/NX	aaAGcc/aacc	-	HIGH	VANGL1	protein_coding	EXON=7/8		ENSCAFT00000035308.3:c.1146_1147del	ENSCAFP00000030553.2:p.Lys382AsnfsTer72	1	VGNC		ENSCAFP00000030553
G3	Indel.LOH	17:90646-90646	CGGGGG	ENSCAFG00000025168	ENSCAFT00000039016.2	ENSCAFT00000039016	Transcript	inframe_insertion	247-248	247-248	83	G/APG	ggg/gCCCCCGgg	-	MODERATE	FAM110C	protein_coding	EXON=1/1		ENSCAFT00000039016.2:c.242_247dup	ENSCAFP00000034814.2:p.Ala81_Pro82dup	-1	HGNC	FAM110C	ENSCAFP00000034814
G3	Indel.Somatic	2:48645386-48645386	C	ENSCAFG00000007191	ENSCAFT00000011541.4	ENSCAFT00000011541	Transcript	frameshift_variant	44020	44020	3	E/AX	gag/gCag	-	HIGH	KIF2A	protein_coding	EXON=1/21		ENSCAFT00000011541.4:c.7_8insC	ENSCAFP00000010694.4:p.Glu3AlafsTer177	1	VGNC		ENSCAFP00000010694
G3	Indel.Somatic	2:48645386-48645386	C	ENSCAFG00000007191	ENSCAFT00000044452.3	ENSCAFT00000044452	Transcript	frameshift_variant	44020	44020	3	E/AX	gag/gCag	-	HIGH	KIF2A	protein_coding	EXON=1/20		ENSCAFT00000044452.3:c.7_8insC	ENSCAFP00000042556.1:p.Glu3AlafsTer177	1	VGNC		ENSCAFP00000042556
G3	Indel.Somatic	2:74303945-74303945	T	ENSCAFG00000012769	ENSCAFT00000020252.5	ENSCAFT00000020252	Transcript	frameshift_variant,splice_region_variant,intron_variant	99-100	99-100	33-34	-/X	-/A	rs852881997	HIGH	MAN1C1	protein_coding			ENSCAFT00000020252.5:c.99_99+1insA	ENSCAFP00000018789.5:p.Leu34ThrfsTer108	-1	VGNC		ENSCAFP00000018789
G3	Indel.Somatic	20:26234180-26234181	-	ENSCAFG00000043578	ENSCAFT00000082747.1	ENSCAFT00000082747	Transcript	frameshift_variant	1479	1479	493	L/X	ctA/ct	-	HIGH		protein_coding	EXON=1/1		ENSCAFT00000082747.1:c.1481del	ENSCAFP00000046919.1:p.Lys494SerfsTer6	1			ENSCAFP00000046919	2
G3	Indel.Somatic	20:37566285-37566291	-	ENSCAFG00000009881	ENSCAFT00000015704.4	ENSCAFT00000015704	Transcript	inframe_deletion	348-353	348-353	116-118	PPP/P	ccGCCGCCt/cct	-	MODERATE	ALAS1	protein_coding	EXON=1/11		ENSCAFT00000015704.4:c.348_353del	ENSCAFP00000014534.4:p.Pro117_Pro118del	-1	VGNC		ENSCAFP00000014534
G3	Indel.LOH	20:50953905-50953905	GGCGGGGGG	ENSCAFG00000017920	ENSCAFT00000028437.5	ENSCAFT00000028437	Transcript	inframe_insertion	408-409	408-409	136-137	-/GGG	-/GGCGGGGGG	-	MODERATE	ANGPTL6	protein_coding	EXON=1/7		ENSCAFT00000028437.5:c.410_411insCGGGGGGGG	ENSCAFP00000026447.5:p.Gly138_Gly140dup	1	VGNC		ENSCAFP00000026447	2
G3	Indel.Somatic	20:870974-870975	-	ENSCAFG00000003989	ENSCAFT00000006280.4	ENSCAFT00000006280	Transcript	frameshift_variant	106	106	36	P/X	Cct/ct	-	HIGH	PLXNA1	protein_coding	EXON=1/7		ENSCAFT00000006280.4:c.107del	ENSCAFP00000005819.4:p.Pro36LeufsTer160	1	VGNC		ENSCAFP00000005819	1
G3	Indel.Somatic	20:870974-870975	-	ENSCAFG00000003989	ENSCAFT00000084688.1	ENSCAFT00000084688	Transcript	frameshift_variant	106	106	36	P/X	Cct/ct	-	HIGH	PLXNA1	protein_coding	EXON=1/36		ENSCAFT00000084688.1:c.107del	ENSCAFP00000044891.1:p.Pro36LeufsTer160	1	VGNC		ENSCAFP00000044891	1
G3	Indel.LOH	21:44256224-44256230	-	ENSCAFG00000029498	ENSCAFT00000047781.2	ENSCAFT00000047781	Transcript	inframe_deletion	389-394	389-394	130-132	GSA/A	gGAAGCGcg/gcg	-	MODERATE	FANCF	protein_coding	EXON=1/1		ENSCAFT00000047781.2:c.389_394del	ENSCAFP00000040041.2:p.Gly130_Ser131del	-1	VGNC		ENSCAFP00000040041
G3	Indel.LOH	21:47390077-47390077	A	ENSCAFG00000010152	ENSCAFT00000016128.4	ENSCAFT00000016128	Transcript	frameshift_variant,splice_region_variant,intron_variant	2603-2604	1971-1972	657-658	-/X	-/A	rs853126437	HIGH	ANO3	protein_coding			ENSCAFT00000016128.4:c.1971+1dup		1	VGNC		ENSCAFP00000014915
G3	Indel.LOH	22:13866057-13866063	-	ENSCAFG00000004870	ENSCAFT00000007840.4	ENSCAFT00000007840	Transcript	inframe_deletion	92-97	92-97	31-33	RAG/R	cGCGCCGgc/cgc	-	MODERATE	PCDH17	protein_coding	EXON=2/5		ENSCAFT00000007840.4:c.95_100del	ENSCAFP00000007267.4:p.Ala32_Gly33del	1	VGNC		ENSCAFP00000007267	3
G3	Indel.LOH	22:13866057-13866063	-	ENSCAFG00000043820	ENSCAFT00000079233.1	ENSCAFT00000079233	Transcript	inframe_deletion	2343-2348	2343-2348	781-783	AGA/A	gcCGGCGCg/gcg	-	MODERATE		protein_coding	EXON=2/2		ENSCAFT00000079233.1:c.2343_2348del	ENSCAFP00000065773.1:p.Gly782_Ala783del	-1			ENSCAFP00000065773
G3	Indel.LOH	23:50655599-50655630	-	ENSCAFG00000045454	ENSCAFT00000081935.1	ENSCAFT00000081935	Transcript	splice_acceptor_variant,splice_donor_variant,non_coding_transcript_exon_variant,intron_variant	?-358	-	-	-	-	-	HIGH		lncRNA	EXON=3/3	INTRON=2/2	ENSCAFT00000081935.1:n.357+2_358del		-1
G3	Indel.Somatic	24:12722429-12722433	-	ENSCAFG00000046174	ENSCAFT00000077633.1	ENSCAFT00000077633	Transcript	frameshift_variant	3719-3722	3719-3722	1240-1241	YP/X	tACCCa/ta	-	HIGH		protein_coding	EXON=1/1		ENSCAFT00000077633.1:c.3722_3725del	ENSCAFP00000055468.1:p.Pro1241HisfsTer14	1			ENSCAFP00000055468	3
G3	Indel.LOH	25:25726733-25726736	-	ENSCAFG00000030391	ENSCAFT00000049558.2	ENSCAFT00000049558	Transcript	inframe_deletion	117-119	117-119	39-40	PP/P	ccACCc/ccc	-	MODERATE		protein_coding	EXON=3/4		ENSCAFT00000049558.2:c.117_119del	ENSCAFP00000050652.1:p.Pro40del	-1			ENSCAFP00000050652
G3	Indel.Somatic	26:16348910-16348910	CT	ENSCAFG00000031458	ENSCAFT00000044210.2	ENSCAFT00000044210	Transcript	frameshift_variant	727-728	727-728	243	T/TX	act/aCTct	-	HIGH		protein_coding	EXON=4/4		ENSCAFT00000044210.2:c.728_729dup	ENSCAFP00000042210.2:p.Ala244LeufsTer?	1			ENSCAFP00000042210	2
G3	Indel.Somatic	26:22732974-22732998	-	ENSCAFG00000012243	ENSCAFT00000019446.5	ENSCAFT00000019446	Transcript	inframe_deletion	1953-1976	1886-1909	629-637	KAKSPVKEE/K	aAGGCCAAGTCCCCAGTGAAGGAGGag/aag	rs852544148	MODERATE	NEFH	protein_coding	EXON=4/4		ENSCAFT00000019446.5:c.1901_1924del	ENSCAFP00000018040.3:p.Val634_Pro641del	1	VGNC		ENSCAFP00000018040	15
G3	Indel.LOH	26:26041950-26041951	-	ENSCAFG00000042203	ENSCAFT00000024696.4	ENSCAFT00000024696	Transcript	frameshift_variant	128	128	43	T/X	aCc/ac	-	HIGH		protein_coding	EXON=2/2		ENSCAFT00000024696.4:c.130del	ENSCAFP00000022911.4:p.Gln44ArgfsTer96	1			ENSCAFP00000022911	2
G3	Indel.LOH	26:27499678-27499682	-	ENSCAFG00000031273	ENSCAFT00000023586.4	ENSCAFT00000023586	Transcript	frameshift_variant	495-498	305-308	102-103	AD/X	gCTGAc/gc	rs851011185	HIGH		protein_coding	EXON=2/2		ENSCAFT00000023586.4:c.307_310del	ENSCAFP00000021899.4:p.Asp103IlefsTer53	1			ENSCAFP00000021899	2
G3	Indel.LOH	26:27499678-27499682	-	ENSCAFG00000031273	ENSCAFT00000084823.1	ENSCAFT00000084823	Transcript	frameshift_variant	850-853	305-308	102-103	AD/X	gCTGAc/gc	rs851011185	HIGH		protein_coding	EXON=2/2		ENSCAFT00000084823.1:c.307_310del	ENSCAFP00000057477.1:p.Asp103IlefsTer53	1			ENSCAFP00000057477	2
G3	Indel.LOH	26:27499678-27499682	-	ENSCAFG00000031273	ENSCAFT00000083246.1	ENSCAFT00000083246	Transcript	frameshift_variant	339-342	305-308	102-103	AD/X	gCTGAc/gc	rs851011185	HIGH		protein_coding	EXON=2/2		ENSCAFT00000083246.1:c.307_310del	ENSCAFP00000057905.1:p.Asp103IlefsTer53	1			ENSCAFP00000057905	2
G3	Indel.LOH	26:27499678-27499682	-	ENSCAFG00000031273	ENSCAFT00000091744.1	ENSCAFT00000091744	Transcript	frameshift_variant	340-343	305-308	102-103	AD/X	gCTGAc/gc	rs851011185	HIGH		protein_coding	EXON=2/2		ENSCAFT00000091744.1:c.307_310del	ENSCAFP00000062075.1:p.Asp103IlefsTer53	1			ENSCAFP00000062075	2
G3	Indel.LOH	26:27499678-27499682	-	ENSCAFG00000031273	ENSCAFT00000063507.1	ENSCAFT00000063507	Transcript	frameshift_variant	337-340	305-308	102-103	AD/X	gCTGAc/gc	rs851011185	HIGH		protein_coding	EXON=2/2		ENSCAFT00000063507.1:c.307_310del	ENSCAFP00000062128.1:p.Asp103IlefsTer53	1			ENSCAFP00000062128	2
G3	Indel.LOH	27:35384953-35384957	-	ENSCAFG00000013453	ENSCAFT00000067860.1	ENSCAFT00000067860	Transcript	splice_donor_variant,coding_sequence_variant,intron_variant	265-?	265-?	89-?	-	-	-	HIGH		protein_coding	EXON=2/6	INTRON=2/5	ENSCAFT00000067860.1:c.265_265+3del		1			ENSCAFP00000049189
G3	Indel.LOH	27:35384953-35384957	-	ENSCAFG00000013453	ENSCAFT00000068528.1	ENSCAFT00000068528	Transcript	splice_donor_variant,coding_sequence_variant,intron_variant	789-?	265-?	89-?	-	-	-	HIGH		protein_coding	EXON=2/6	INTRON=2/5	ENSCAFT00000068528.1:c.265_265+3del		1			ENSCAFP00000058031
G3	Indel.LOH	27:5097837-5097837	ACTGTAG	ENSCAFG00000008571	ENSCAFT00000013602.4	ENSCAFT00000013602	Transcript	frameshift_variant	699-700	699-700	233-234	-/LQX	-/CTACAGT	-	HIGH	KCNH3	protein_coding	EXON=5/15		ENSCAFT00000013602.4:c.699_700insCTACAGT	ENSCAFP00000012585.4:p.Val234LeufsTer32	-1	VGNC		ENSCAFP00000012585
G3	Indel.LOH	27:5097837-5097837	ACTGTAG	ENSCAFG00000008571	ENSCAFT00000049004.3	ENSCAFT00000049004	Transcript	frameshift_variant	699-700	699-700	233-234	-/LQX	-/CTACAGT	-	HIGH	KCNH3	protein_coding	EXON=5/14		ENSCAFT00000049004.3:c.699_700insCTACAGT	ENSCAFP00000037925.2:p.Val234LeufsTer32	-1	VGNC		ENSCAFP00000037925
G3	Indel.Somatic	27:531075-531108	-	ENSCAFG00000041925	ENSCAFT00000075426.1	ENSCAFT00000075426	Transcript	splice_donor_variant,non_coding_transcript_exon_variant,intron_variant	381-?	-	-	-	-	-	HIGH		lncRNA	EXON=3/5	INTRON=3/4	ENSCAFT00000075426.1:n.408+9_408+41del		1
G3	Indel.Somatic	28:10853503-10853566	-	ENSCAFG00000025366	ENSCAFT00000039383.4	ENSCAFT00000039383	Transcript	splice_acceptor_variant,coding_sequence_variant,intron_variant	?-614	?-614	?-205	-	-	-	HIGH	C28H10orf62	protein_coding	EXON=2/2	INTRON=1/1	ENSCAFT00000039383.4:c.580-21_621del		1	VGNC		ENSCAFP00000035228
G3	Indel.Somatic	28:33151733-33151733	GCGC	ENSCAFG00000012714	ENSCAFT00000020150.4	ENSCAFT00000020150	Transcript	frameshift_variant	736-737	342-343	114-115	-/AX	-/GCGC	rs852551043	HIGH	GPR26	protein_coding	EXON=1/3		ENSCAFT00000020150.4:c.344_347dup	ENSCAFP00000018689.4:p.Val117AlafsTer18	1	VGNC		ENSCAFP00000018689	5
G3	Indel.Somatic	29:16711889-16711934	-	ENSCAFG00000007411	ENSCAFT00000011890.5	ENSCAFT00000011890	Transcript	splice_acceptor_variant,coding_sequence_variant,3_prime_UTR_variant,intron_variant	?-3641	-	-	-	-	-	HIGH	CSPP1	protein_coding	EXON=32/32	INTRON=31/31	ENSCAFT00000011890.5:c.3545-27_*10del		1	VGNC		ENSCAFP00000011024
G3	Indel.Somatic	3:26476315-26476316	-	ENSCAFG00000042278	ENSCAFT00000072936.1	ENSCAFT00000072936	Transcript	frameshift_variant	417	417	139	I/X	atC/at	-	HIGH		protein_coding	EXON=1/1		ENSCAFT00000072936.1:c.420del	ENSCAFP00000059383.1:p.Ser142HisfsTer13	1			ENSCAFP00000059383	3
G3	Indel.Somatic	3:64874803-64874804	-	ENSCAFG00000020296	ENSCAFT00000032323.3	ENSCAFT00000032323	Transcript	frameshift_variant	257	214	72	S/X	Agc/gc	-	HIGH		protein_coding	EXON=2/2		ENSCAFT00000032323.3:c.214del	ENSCAFP00000030404.2:p.Ser72AlafsTer7	-1			ENSCAFP00000030404
G3	Indel.Somatic	3:64874812-64874813	-	ENSCAFG00000020296	ENSCAFT00000032323.3	ENSCAFT00000032323	Transcript	frameshift_variant	248	205	69	M/X	Atg/tg	-	HIGH		protein_coding	EXON=2/2		ENSCAFT00000032323.3:c.205del	ENSCAFP00000030404.2:p.Met69CysfsTer10	-1			ENSCAFP00000030404
G3	Indel.Somatic	3:64874821-64874826	-	ENSCAFG00000020296	ENSCAFT00000032323.3	ENSCAFT00000032323	Transcript	frameshift_variant	235-239	192-196	64-66	KKT/NX	aaGAAAAca/aaca	-	HIGH		protein_coding	EXON=2/2		ENSCAFT00000032323.3:c.192_196del	ENSCAFP00000030404.2:p.Lys64AsnfsTer21	-1			ENSCAFP00000030404
G3	Indel.Somatic	30:38214932-38214932	GG	ENSCAFG00000018001	ENSCAFT00000083444.1	ENSCAFT00000083444	Transcript	frameshift_variant	920-921	622-623	208	W/WX	tgg/tGGgg	-	HIGH	NEIL1	protein_coding	EXON=4/9		ENSCAFT00000083444.1:c.636_637dup	ENSCAFP00000057200.1:p.Glu213GlyfsTer20	1	VGNC		ENSCAFP00000057200	15
G3	Indel.Somatic	31:38307729-38307730	-	ENSCAFG00000048651	ENSCAFT00000068200.1	ENSCAFT00000068200	Transcript	frameshift_variant	293	293	98	P/X	cCt/ct	-	HIGH		protein_coding	EXON=1/2		ENSCAFT00000068200.1:c.293del	ENSCAFP00000054448.1:p.Pro98LeufsTer8	-1			ENSCAFP00000054448
G3	Indel.Somatic	31:38307749-38307749	G	ENSCAFG00000048651	ENSCAFT00000068200.1	ENSCAFT00000068200	Transcript	frameshift_variant	273-274	273-274	91-92	-/X	-/C	-	HIGH		protein_coding	EXON=1/2		ENSCAFT00000068200.1:c.273_274insC	ENSCAFP00000054448.1:p.Asp92ArgfsTer22	-1			ENSCAFP00000054448
G3	Indel.Somatic	32:11021308-11021311	-	ENSCAFG00000044575	ENSCAFT00000063924.1	ENSCAFT00000063924	Transcript	inframe_deletion	2132-2134	1887-1889	629-630	DS/D	gaCAGt/gat	-	MODERATE		protein_coding	EXON=4/4		ENSCAFT00000063924.1:c.1887_1889del	ENSCAFP00000053612.1:p.Ser631del	1			ENSCAFP00000053612
G3	Indel.LOH	32:4508593-4508612	-	ENSCAFG00000008886	ENSCAFT00000038532.3	ENSCAFT00000038532	Transcript	frameshift_variant	378-396	378-396	126-132	-	ggAGCCGAGAATCNNNNNNNN/gg	-	HIGH	FGF5	protein_coding	EXON=1/3		ENSCAFT00000038532.3:c.378_396del		1	VGNC		ENSCAFP00000034270
G3	Indel.LOH	33:20539488-20539489	-	ENSCAFG00000043421	ENSCAFT00000064482.1	ENSCAFT00000064482	Transcript	frameshift_variant	1085	1085	362	T/X	aCc/ac	-	HIGH		protein_coding	EXON=1/1		ENSCAFT00000064482.1:c.1086del	ENSCAFP00000057596.1:p.Arg363GlyfsTer11	1			ENSCAFP00000057596	1
G3	Indel.LOH	33:24599632-24599633	-	ENSCAFG00000047704	ENSCAFT00000075142.1	ENSCAFT00000075142	Transcript	frameshift_variant	2449	2449	817	M/X	Atg/tg	-	HIGH		protein_coding	EXON=1/1		ENSCAFT00000075142.1:c.2449del	ENSCAFP00000047288.1:p.Met817CysfsTer24	-1			ENSCAFP00000047288
G3	Indel.LOH	33:26426-26428	-	ENSCAFG00000009973	ENSCAFT00000015865.3	ENSCAFT00000015865	Transcript	frameshift_variant	279-280	279-280	93-94	VK/VX	gtAAag/gtag	-	HIGH		protein_coding	EXON=1/1		ENSCAFT00000015865.3:c.280_281del	ENSCAFP00000041895.2:p.Lys94ValfsTer3	1			ENSCAFP00000041895	1
G3	Indel.LOH	33:28028038-28028038	GAAGAAGAAGAAGAAGAAACT	ENSCAFG00000012542	ENSCAFT00000019903.4	ENSCAFT00000019903	Transcript	inframe_insertion	1972-1973	1964-1965	655	S/SVSSSSSS	tct/tcAGTTTCTTCTTCTTCTTCTTCt	-	MODERATE	HEG1	protein_coding	EXON=6/17		ENSCAFT00000019903.4:c.1964_1965insAGTTTCTTCTTCTTCTTCTTC	ENSCAFP00000018458.4:p.Ser655_Ser656insValSerSerSerSerSerSer	-1	VGNC		ENSCAFP00000018458
G3	Indel.LOH	35:12233455-12233455	TG	ENSCAFG00000041180	ENSCAFT00000079006.1	ENSCAFT00000079006	Transcript	frameshift_variant	704-705	460-461	154	M/MX	atg/aTGtg	rs851259266	HIGH		protein_coding	EXON=4/4		ENSCAFT00000079006.1:c.473_474dup	ENSCAFP00000058288.1:p.Arg159CysfsTer?	1			ENSCAFP00000058288	14
G3	Indel.LOH	37:18100563-18100565	-	ENSCAFG00000049451	ENSCAFT00000072925.1	ENSCAFT00000072925	Transcript	frameshift_variant	79-80	79-80	27	V/X	GTt/t	-	HIGH		protein_coding	EXON=1/1		ENSCAFT00000072925.1:c.79_80del	ENSCAFP00000052447.1:p.Val27PhefsTer20	-1			ENSCAFP00000052447
G3	Indel.LOH	38:1747783-1747792	-	ENSCAFG00000010030	ENSCAFT00000015952.5	ENSCAFT00000015952	Transcript	inframe_deletion	442-450	343-351	115-117	QQQ/-	CAGCAGCAG/-	rs851329311	MODERATE	TMCC2	protein_coding	EXON=2/5		ENSCAFT00000015952.5:c.373_381del	ENSCAFP00000014755.4:p.Gln125_Gln127del	1	VGNC		ENSCAFP00000014755	30
G3	Indel.Somatic	4:51379332-51379334	-	ENSCAFG00000017318	ENSCAFT00000027476.4	ENSCAFT00000027476	Transcript	frameshift_variant	101-102	101-102	34	A/X	gCC/g	-	HIGH	EBF1	protein_coding	EXON=1/16		ENSCAFT00000027476.4:c.101_102del	ENSCAFP00000025552.4:p.Ala34GlyfsTer21	1	VGNC		ENSCAFP00000025552
G3	Indel.Somatic	4:51379332-51379334	-	ENSCAFG00000017318	ENSCAFT00000069603.1	ENSCAFT00000069603	Transcript	frameshift_variant	101-102	101-102	34	A/X	gCC/g	-	HIGH	EBF1	protein_coding	EXON=1/15		ENSCAFT00000069603.1:c.101_102del	ENSCAFP00000048750.1:p.Ala34GlyfsTer21	1	VGNC		ENSCAFP00000048750
G3	Indel.Somatic	4:51379332-51379334	-	ENSCAFG00000017318	ENSCAFT00000069083.1	ENSCAFT00000069083	Transcript	frameshift_variant	101-102	101-102	34	A/X	gCC/g	-	HIGH	EBF1	protein_coding	EXON=1/15		ENSCAFT00000069083.1:c.101_102del	ENSCAFP00000049973.1:p.Ala34GlyfsTer21	1	VGNC		ENSCAFP00000049973
G3	Indel.LOH	6:20616962-20616965	-	ENSCAFG00000046641	ENSCAFT00000090017.1	ENSCAFT00000090017	Transcript	inframe_deletion	498-500	449-451	150-151	GA/A	gGGGcc/gcc	-	MODERATE		protein_coding	EXON=1/2		ENSCAFT00000090017.1:c.449_451del	ENSCAFP00000056315.1:p.Gly150del	-1			ENSCAFP00000056315
G3	Indel.LOH	6:24639228-24639228	T	ENSCAFG00000023236	ENSCAFT00000028547.4	ENSCAFT00000028547	Transcript	frameshift_variant,splice_region_variant	25-26	25-26	9	G/EX	gga/gAga	-	HIGH	ACSM4	protein_coding	EXON=2/15		ENSCAFT00000028547.4:c.25_26insA	ENSCAFP00000026553.4:p.Gly9GlufsTer26	-1	HGNC	ACSM4	ENSCAFP00000026553
G3	Indel.LOH	6:40331985-40331986	-	ENSCAFG00000028569	ENSCAFT00000049567.2	ENSCAFT00000049567	Transcript	frameshift_variant	317	317	106	G/X	gGt/gt	-	HIGH		protein_coding	EXON=2/2		ENSCAFT00000049567.2:c.317del	ENSCAFP00000036048.2:p.Gly106ValfsTer59	-1			ENSCAFP00000036048
G3	Indel.LOH	6:40331985-40331986	-	ENSCAFG00000028569	ENSCAFT00000092663.1	ENSCAFT00000092663	Transcript	frameshift_variant	540	317	106	G/X	gGt/gt	-	HIGH		protein_coding	EXON=2/2		ENSCAFT00000092663.1:c.317del	ENSCAFP00000059041.1:p.Gly106ValfsTer59	-1			ENSCAFP00000059041
G3	Indel.LOH	6:63389835-63389835	CCCGCG	ENSCAFG00000020309	ENSCAFT00000032348.5	ENSCAFT00000032348	Transcript	inframe_insertion	90-91	90-91	30-31	-/RG	-/CGCGGG	-	MODERATE	SPATA1	protein_coding	EXON=1/14		ENSCAFT00000032348.5:c.85_90dup	ENSCAFP00000030122.4:p.Arg29_Gly30dup	-1	VGNC		ENSCAFP00000030122
G3	Indel.LOH	7:14426348-14426348	AGGCGGTGC	ENSCAFG00000012826	ENSCAFT00000020339.4	ENSCAFT00000020339	Transcript	inframe_insertion	1624-1625	1624-1625	542	E/EAVQ	gag/gAGGCGGTGCag	-	MODERATE	KIAA1614	protein_coding	EXON=5/10		ENSCAFT00000020339.4:c.1630_1631insTGCAGGCGG	ENSCAFP00000018872.4:p.Ala543_Ala544insValGlnAla	1	VGNC		ENSCAFP00000018872	6
G3	Indel.LOH	7:14426348-14426348	AGGCGGTGC	ENSCAFG00000012826	ENSCAFT00000048905.3	ENSCAFT00000048905	Transcript	inframe_insertion	1762-1763	1684-1685	562	E/EAVQ	gag/gAGGCGGTGCag	-	MODERATE	KIAA1614	protein_coding	EXON=5/10		ENSCAFT00000048905.3:c.1690_1691insTGCAGGCGG	ENSCAFP00000035844.1:p.Ala563_Ala564insValGlnAla	1	VGNC		ENSCAFP00000035844	6
G3	Indel.Somatic	7:44757831-44757837	-	ENSCAFG00000017629	ENSCAFT00000027958.6	ENSCAFT00000027958	Transcript	inframe_deletion	2917-2922	2917-2922	973-974	ER/-	GAGAGG/-	rs853127792	MODERATE	LOXHD1	protein_coding	EXON=20/41		ENSCAFT00000027958.6:c.2919_2924del	ENSCAFP00000026001.5:p.Arg974_Glu975del	1	VGNC		ENSCAFP00000026001	2
G3	Indel.Somatic	7:44757831-44757837	-	ENSCAFG00000017629	ENSCAFT00000049867.2	ENSCAFT00000049867	Transcript	inframe_deletion	2917-2922	2917-2922	973-974	ER/-	GAGAGG/-	rs853127792	MODERATE	LOXHD1	protein_coding	EXON=20/42		ENSCAFT00000049867.2:c.2919_2924del	ENSCAFP00000042728.2:p.Arg974_Glu975del	1	VGNC		ENSCAFP00000042728	2
G3	Indel.Somatic	7:73520226-73520227	-	ENSCAFG00000024483	ENSCAFT00000037790.3	ENSCAFT00000037790	Transcript	frameshift_variant	1219	1219	407	E/X	Gag/ag	-	HIGH		protein_coding	EXON=1/1		ENSCAFT00000037790.3:c.1219del	ENSCAFP00000063643.1:p.Glu407ArgfsTer?	1			ENSCAFP00000063643
G3	Indel.LOH	8:2839736-2839736	T	ENSCAFG00000011124	ENSCAFT00000017693.3	ENSCAFT00000017693	Transcript	frameshift_variant	284-285	284-285	95	N/KX	aat/aaAt	-	HIGH		protein_coding	EXON=1/1		ENSCAFT00000017693.3:c.284dup	ENSCAFP00000063711.1:p.Asn95LysfsTer9	-1			ENSCAFP00000063711
G3	Indel.LOH	9:1890227-1890272	-	ENSCAFG00000005554	ENSCAFT00000008949.4	ENSCAFT00000008949	Transcript	inframe_deletion	2211-2255	1317-1361	439-454	PPPTLQGTSSRTASTP/P	ccGCCACCCACGCTCCAGGGAACCAGCAGCAGGACGGCCAGCACCCCc/ccc	-	MODERATE	ENPP7	protein_coding	EXON=5/7		ENSCAFT00000008949.4:c.1317_1361del	ENSCAFP00000008301.4:p.Pro440_Pro454del	-1	VGNC		ENSCAFP00000008301
G3	Indel.LOH	9:1890227-1890272	-	ENSCAFG00000005554	ENSCAFT00000084638.1	ENSCAFT00000084638	Transcript	inframe_deletion	2291-2335	1497-1541	499-514	PPPTLQGTSSRTASTP/P	ccGCCACCCACGCTCCAGGGAACCAGCAGCAGGACGGCCAGCACCCCc/ccc	-	MODERATE	ENPP7	protein_coding	EXON=4/6		ENSCAFT00000084638.1:c.1497_1541del	ENSCAFP00000057622.1:p.Pro500_Pro514del	-1	VGNC		ENSCAFP00000057622
G3	Indel.LOH	9:37909524-37909524	CTTC	ENSCAFG00000048009	ENSCAFT00000060339.1	ENSCAFT00000060339	Transcript	frameshift_variant,splice_region_variant	156-157	156-157	52-53	-/EX	-/GAAG	-	HIGH	C17orf50	protein_coding	EXON=1/4		ENSCAFT00000060339.1:c.156_157insGAAG	ENSCAFP00000061480.1:p.Met53GlufsTer101	-1	HGNC	C17orf50	ENSCAFP00000061480
G3	Indel.LOH	9:37909525-37909525	T	ENSCAFG00000048009	ENSCAFT00000060339.1	ENSCAFT00000060339	Transcript	frameshift_variant,splice_region_variant	155-156	155-156	52	E/EX	gag/gaAg	-	HIGH	C17orf50	protein_coding	EXON=1/4		ENSCAFT00000060339.1:c.155dup	ENSCAFP00000061480.1:p.Met53AspfsTer100	-1	HGNC	C17orf50	ENSCAFP00000061480
G3	Indel.LOH	9:4121760-4121761	-	ENSCAFG00000005132	ENSCAFT00000076647.1	ENSCAFT00000076647	Transcript	frameshift_variant	1087	1072	358	T/X	Acc/cc	-	HIGH	ST6GALNAC1	protein_coding	EXON=3/9		ENSCAFT00000076647.1:c.1072del	ENSCAFP00000049193.1:p.Thr358ProfsTer9	1	VGNC		ENSCAFP00000049193
G3	Indel.Somatic	9:5907980-5907983	-	ENSCAFG00000024792	ENSCAFT00000038313.3	ENSCAFT00000038313	Transcript	inframe_deletion	531-533	189-191	63-64	WK/W	tgGAAg/tgg	rs852788717	MODERATE		protein_coding	EXON=2/5		ENSCAFT00000038313.3:c.194_196del	ENSCAFP00000034012.2:p.Lys65del	1			ENSCAFP00000034012	5
G3	Indel.Somatic	9:5908133-5908133	GTG	ENSCAFG00000024792	ENSCAFT00000038313.3	ENSCAFT00000038313	Transcript	inframe_insertion	683-684	341-342	114	L/LW	ctg/ctGTGg	rs851118190	MODERATE		protein_coding	EXON=2/5		ENSCAFT00000038313.3:c.343_345dup	ENSCAFP00000034012.2:p.Trp115dup	1			ENSCAFP00000034012	4
G3	Indel.LOH	X:122914364-122914364	GGC	ENSCAFG00000023407	ENSCAFT00000035969.3	ENSCAFT00000035969	Transcript	inframe_insertion	51-52	51-52	17-18	-/G	-/GGC	-	MODERATE		protein_coding	EXON=1/1		ENSCAFT00000035969.3:c.80_82dup	ENSCAFP00000031287.3:p.Gly27dup	1			ENSCAFP00000031287	31
G3	Indel.Somatic	X:43109757-43109758	-	ENSCAFG00000016018	ENSCAFT00000025414.4	ENSCAFT00000025414	Transcript	frameshift_variant	813	813	271	G/X	ggG/gg	rs852072182	HIGH	DGKK	protein_coding	EXON=9/29		ENSCAFT00000025414.4:c.813del	ENSCAFP00000023598.4:p.Ser273ProfsTer28	-1	VGNC		ENSCAFP00000023598
G3	Indel.Somatic	X:43109757-43109758	-	ENSCAFG00000016018	ENSCAFT00000061685.1	ENSCAFT00000061685	Transcript	frameshift_variant	792	735	245	G/X	ggG/gg	rs852072182	HIGH	DGKK	protein_coding	EXON=7/27		ENSCAFT00000061685.1:c.735del	ENSCAFP00000060709.1:p.Ser247ProfsTer28	-1	VGNC		ENSCAFP00000060709
P1	Indel.Somatic	1:114475221-114475222	-	ENSCAFG00000005896	ENSCAFT00000009509.4	ENSCAFT00000009509	Transcript	frameshift_variant	13235	13235	4412	D/X	gAc/gc	-	HIGH	RYR1	protein_coding	EXON=91/106		ENSCAFT00000009509.4:c.13235del	ENSCAFP00000008828.4:p.Asp4412AlafsTer139	-1	VGNC		ENSCAFP00000008828
P1	Indel.Somatic	1:114475221-114475222	-	ENSCAFG00000005896	ENSCAFT00000048904.3	ENSCAFT00000048904	Transcript	frameshift_variant	13220	13220	4407	D/X	gAc/gc	-	HIGH	RYR1	protein_coding	EXON=90/105		ENSCAFT00000048904.3:c.13220del	ENSCAFP00000037375.2:p.Asp4407AlafsTer139	-1	VGNC		ENSCAFP00000037375
P1	Indel.LOH	1:75836898-75836898	CCGCCCCCGCCCCGCCC	ENSCAFG00000029948	ENSCAFT00000043618.2	ENSCAFT00000043618	Transcript	frameshift_variant	271-272	271-272	91	E/GAGRGRX	gag/gGGGCGGGGCGGGGGCGGag	-	HIGH	IDNK	protein_coding	EXON=1/6		ENSCAFT00000043618.2:c.255_271dup	ENSCAFP00000042334.2:p.Glu91GlyfsTer65	-1	VGNC		ENSCAFP00000042334
P1	Indel.LOH	1:75836898-75836898	CCGCCCCCGCCCCGCCC	ENSCAFG00000029948	ENSCAFT00000063603.1	ENSCAFT00000063603	Transcript	frameshift_variant	271-272	271-272	91	E/GAGRGRX	gag/gGGGCGGGGCGGGGGCGGag	-	HIGH	IDNK	protein_coding	EXON=1/6		ENSCAFT00000063603.1:c.255_271dup	ENSCAFP00000046786.1:p.Glu91GlyfsTer98	-1	VGNC		ENSCAFP00000046786
P1	Indel.LOH	1:75836898-75836898	CCGCCCCCGCCCCGCCC	ENSCAFG00000029948	ENSCAFT00000077793.1	ENSCAFT00000077793	Transcript	frameshift_variant	271-272	271-272	91	E/GAGRGRX	gag/gGGGCGGGGCGGGGGCGGag	-	HIGH	IDNK	protein_coding	EXON=1/4		ENSCAFT00000077793.1:c.255_271dup	ENSCAFP00000056230.1:p.Glu91GlyfsTer64	-1	VGNC		ENSCAFP00000056230
P1	Indel.LOH	1:75836898-75836898	CCGCCCCCGCCCCGCCC	ENSCAFG00000029948	ENSCAFT00000062052.1	ENSCAFT00000062052	Transcript	frameshift_variant	271-272	271-272	91	E/GAGRGRX	gag/gGGGCGGGGCGGGGGCGGag	-	HIGH	IDNK	protein_coding	EXON=1/3		ENSCAFT00000062052.1:c.255_271dup	ENSCAFP00000059892.1:p.Glu91GlyfsTer77	-1	VGNC		ENSCAFP00000059892
P1	Indel.LOH	1:75836898-75836898	CCGCCCCCGCCCCGCCC	ENSCAFG00000029948	ENSCAFT00000075263.1	ENSCAFT00000075263	Transcript	frameshift_variant	271-272	271-272	91	E/GAGRGRX	gag/gGGGCGGGGCGGGGGCGGag	-	HIGH	IDNK	protein_coding	EXON=1/7		ENSCAFT00000075263.1:c.255_271dup	ENSCAFP00000061018.1:p.Glu91GlyfsTer65	-1	VGNC		ENSCAFP00000061018
P1	Indel.LOH	1:75836916-75836917	-	ENSCAFG00000029948	ENSCAFT00000062052.1	ENSCAFT00000062052	Transcript	frameshift_variant	253	253	85	R/X	Agg/gg	-	HIGH	IDNK	protein_coding	EXON=1/3		ENSCAFT00000062052.1:c.253del	ENSCAFP00000059892.1:p.Arg85GlyfsTer77	-1	VGNC		ENSCAFP00000059892
P1	Indel.LOH	1:75836916-75836917	-	ENSCAFG00000029948	ENSCAFT00000043618.2	ENSCAFT00000043618	Transcript	frameshift_variant	253	253	85	R/X	Agg/gg	-	HIGH	IDNK	protein_coding	EXON=1/6		ENSCAFT00000043618.2:c.253del	ENSCAFP00000042334.2:p.Arg85GlyfsTer65	-1	VGNC		ENSCAFP00000042334
P1	Indel.LOH	1:75836916-75836917	-	ENSCAFG00000029948	ENSCAFT00000063603.1	ENSCAFT00000063603	Transcript	frameshift_variant	253	253	85	R/X	Agg/gg	-	HIGH	IDNK	protein_coding	EXON=1/6		ENSCAFT00000063603.1:c.253del	ENSCAFP00000046786.1:p.Arg85GlyfsTer98	-1	VGNC		ENSCAFP00000046786
P1	Indel.LOH	1:75836916-75836917	-	ENSCAFG00000029948	ENSCAFT00000077793.1	ENSCAFT00000077793	Transcript	frameshift_variant	253	253	85	R/X	Agg/gg	-	HIGH	IDNK	protein_coding	EXON=1/4		ENSCAFT00000077793.1:c.253del	ENSCAFP00000056230.1:p.Arg85GlyfsTer64	-1	VGNC		ENSCAFP00000056230
P1	Indel.LOH	1:75836916-75836917	-	ENSCAFG00000029948	ENSCAFT00000075263.1	ENSCAFT00000075263	Transcript	frameshift_variant	253	253	85	R/X	Agg/gg	-	HIGH	IDNK	protein_coding	EXON=1/7		ENSCAFT00000075263.1:c.253del	ENSCAFP00000061018.1:p.Arg85GlyfsTer65	-1	VGNC		ENSCAFP00000061018
P1	Indel.Somatic	1:82062199-82062199	G	ENSCAFG00000030179	ENSCAFT00000049723.3	ENSCAFT00000049723	Transcript	frameshift_variant	479-480	479-480	160	A/AX	gcg/gcGg	-	HIGH	RFK	protein_coding	EXON=2/5		ENSCAFT00000049723.3:c.483dup	ENSCAFP00000037587.2:p.Arg162AlafsTer85	1	VGNC		ENSCAFP00000037587	4
P1	Indel.LOH	1:89121257-89121258	-	ENSCAFG00000001943	ENSCAFT00000003076.4	ENSCAFT00000003076	Transcript	frameshift_variant	103	103	35	I/X	Atc/tc	rs8558590	HIGH	CBWD1	protein_coding	EXON=1/15		ENSCAFT00000003076.4:c.103del	ENSCAFP00000002857.4:p.Ile35SerfsTer3	-1	EntrezGene		ENSCAFP00000002857
P1	Indel.LOH	1:89121257-89121258	-	ENSCAFG00000001943	ENSCAFT00000077049.1	ENSCAFT00000077049	Transcript	frameshift_variant	103	103	35	I/X	Atc/tc	rs8558590	HIGH	CBWD1	protein_coding	EXON=1/14		ENSCAFT00000077049.1:c.103del	ENSCAFP00000049097.1:p.Ile35SerfsTer3	-1	EntrezGene		ENSCAFP00000049097
P1	Indel.LOH	1:89121257-89121258	-	ENSCAFG00000001943	ENSCAFT00000075035.1	ENSCAFT00000075035	Transcript	frameshift_variant	103	103	35	I/X	Atc/tc	rs8558590	HIGH	CBWD1	protein_coding	EXON=1/14		ENSCAFT00000075035.1:c.103del	ENSCAFP00000052869.1:p.Ile35SerfsTer3	-1	EntrezGene		ENSCAFP00000052869
P1	Indel.LOH	1:89121257-89121258	-	ENSCAFG00000001943	ENSCAFT00000074274.1	ENSCAFT00000074274	Transcript	frameshift_variant	103	103	35	I/X	Atc/tc	rs8558590	HIGH	CBWD1	protein_coding	EXON=1/14		ENSCAFT00000074274.1:c.103del	ENSCAFP00000056285.1:p.Ile35SerfsTer3	-1	EntrezGene		ENSCAFP00000056285
P1	Indel.LOH	1:89121257-89121258	-	ENSCAFG00000001943	ENSCAFT00000074591.1	ENSCAFT00000074591	Transcript	frameshift_variant	103	103	35	I/X	Atc/tc	rs8558590	HIGH	CBWD1	protein_coding	EXON=1/14		ENSCAFT00000074591.1:c.103del	ENSCAFP00000059745.1:p.Ile35SerfsTer3	-1	EntrezGene		ENSCAFP00000059745
P1	Indel.LOH	1:89121257-89121258	-	ENSCAFG00000001943	ENSCAFT00000074137.1	ENSCAFT00000074137	Transcript	frameshift_variant	103	103	35	I/X	Atc/tc	rs8558590	HIGH	CBWD1	protein_coding	EXON=1/14		ENSCAFT00000074137.1:c.103del	ENSCAFP00000065109.1:p.Ile35SerfsTer3	-1	EntrezGene		ENSCAFP00000065109
P1	Indel.LOH	10:17023385-17023385	C	ENSCAFG00000000689	ENSCAFT00000001073.4	ENSCAFT00000001073	Transcript	frameshift_variant	4075-4076	4075-4076	1359	A/AX	gcg/gCcg	-	HIGH	TUBGCP6	protein_coding	EXON=19/25		ENSCAFT00000001073.4:c.4076dup	ENSCAFP00000000983.4:p.Arg1360AlafsTer31	1	VGNC		ENSCAFP00000000983	1
P1	Indel.LOH	10:17023385-17023385	C	ENSCAFG00000000689	ENSCAFT00000078929.1	ENSCAFT00000078929	Transcript	frameshift_variant	4063-4064	4063-4064	1355	A/AX	gcg/gCcg	-	HIGH	TUBGCP6	protein_coding	EXON=18/24		ENSCAFT00000078929.1:c.4064dup	ENSCAFP00000053387.1:p.Arg1356AlafsTer31	1	VGNC		ENSCAFP00000053387	1
P1	Indel.LOH	11:22313157-22313158	-	ENSCAFG00000000990	ENSCAFT00000001527.5	ENSCAFT00000001527	Transcript	frameshift_variant,splice_region_variant	46	46	16	G/X	Ggc/gc	-	HIGH	TCF7	protein_coding	EXON=1/11		ENSCAFT00000001527.5:c.47del	ENSCAFP00000001404.5:p.Gly16AlafsTer93	1	VGNC		ENSCAFP00000001404	1
P1	Indel.LOH	11:22313157-22313158	-	ENSCAFG00000000990	ENSCAFT00000069703.1	ENSCAFT00000069703	Transcript	frameshift_variant,splice_region_variant	46	46	16	G/X	Ggc/gc	-	HIGH	TCF7	protein_coding	EXON=1/13		ENSCAFT00000069703.1:c.47del	ENSCAFP00000043629.1:p.Gly16AlafsTer93	1	VGNC		ENSCAFP00000043629	1
P1	Indel.LOH	11:22313157-22313158	-	ENSCAFG00000000990	ENSCAFT00000081501.1	ENSCAFT00000081501	Transcript	frameshift_variant	54	46	16	G/X	Ggc/gc	-	HIGH	TCF7	protein_coding	EXON=1/12		ENSCAFT00000081501.1:c.47del	ENSCAFP00000047285.1:p.Gly16AlafsTer112	1	VGNC		ENSCAFP00000047285	1
P1	Indel.LOH	11:22313157-22313158	-	ENSCAFG00000000990	ENSCAFT00000082079.1	ENSCAFT00000082079	Transcript	frameshift_variant	54	46	16	G/X	Ggc/gc	-	HIGH	TCF7	protein_coding	EXON=1/10		ENSCAFT00000082079.1:c.47del	ENSCAFP00000062293.1:p.Gly16AlafsTer112	1	VGNC		ENSCAFP00000062293	1
P1	Indel.Somatic	12:2900674-2900675	-	ENSCAFG00000013082	ENSCAFT00000020747.4	ENSCAFT00000020747	Transcript	frameshift_variant	617	617	206	N/X	aAt/at	-	HIGH		protein_coding	EXON=2/2		ENSCAFT00000020747.4:c.617del	ENSCAFP00000032473.3:p.Asn206MetfsTer3	-1			ENSCAFP00000032473
P1	Indel.LOH	13:5659345-5659347	-	ENSCAFG00000000676	ENSCAFT00000001047.4	ENSCAFT00000001047	Transcript	frameshift_variant	117-118	117-118	39-40	PP/PX	ccGCcc/cccc	-	HIGH	DPYS	protein_coding	EXON=1/10		ENSCAFT00000001047.4:c.117_118del	ENSCAFP00000000959.4:p.Pro41ArgfsTer100	-1	VGNC		ENSCAFP00000000959
P1	Indel.LOH	13:59733506-59733542	-	ENSCAFG00000045239	ENSCAFT00000076190.1	ENSCAFT00000076190	Transcript	splice_acceptor_variant,non_coding_transcript_exon_variant,intron_variant	-	-	-	-	-	-	HIGH		pseudogene	EXON=7/8	INTRON=6-7/7	ENSCAFT00000076190.1:n.477-6_504del		1
P1	Indel.LOH	14:12134106-12134106	A	ENSCAFG00000001783	ENSCAFT00000002800.3	ENSCAFT00000002800	Transcript	frameshift_variant	1569-1570	1569-1570	523-524	-/X	-/T	rs851729774	HIGH		protein_coding	EXON=2/2		ENSCAFT00000002800.3:c.1569dup	ENSCAFP00000056162.1:p.His524SerfsTer?	-1			ENSCAFP00000056162
P1	Indel.LOH	14:14032479-14032482	-	ENSCAFG00000001852	ENSCAFT00000002915.4	ENSCAFT00000002915	Transcript	inframe_deletion	43990	43990	43864	QA/Q	caGGCg/cag	-	MODERATE	ADAM22	protein_coding	EXON=1/31		ENSCAFT00000002915.4:c.24_26del	ENSCAFP00000002703.4:p.Ala10del	1	VGNC		ENSCAFP00000002703	18
P1	Indel.LOH	14:14032479-14032482	-	ENSCAFG00000001852	ENSCAFT00000047142.3	ENSCAFT00000047142	Transcript	inframe_deletion	43990	43990	43864	QA/Q	caGGCg/cag	-	MODERATE	ADAM22	protein_coding	EXON=1/32		ENSCAFT00000047142.3:c.24_26del	ENSCAFP00000039144.1:p.Ala10del	1	VGNC		ENSCAFP00000039144	18
P1	Indel.LOH	14:17833542-17833542	G	ENSCAFG00000030010	ENSCAFT00000045451.2	ENSCAFT00000045451	Transcript	frameshift_variant	247-248	247-248	83	Q/PX	cag/cCag	rs853161073	HIGH		protein_coding	EXON=1/2		ENSCAFT00000045451.2:c.247dup	ENSCAFP00000037070.2:p.Gln83ProfsTer11	-1			ENSCAFP00000037070
P1	Indel.LOH	14:18121396-18121399	-	ENSCAFG00000001980	ENSCAFT00000003136.4	ENSCAFT00000003136	Transcript	inframe_deletion	1394-1396	797-799	266-267	TS/T	aCTTct/act	rs850548548	MODERATE	RBM48	protein_coding	EXON=4/5		ENSCAFT00000003136.4:c.801_803del	ENSCAFP00000002913.3:p.Ser268del	1	VGNC		ENSCAFP00000002913	4
P1	Indel.LOH	14:19977172-19977175	-	ENSCAFG00000002093	ENSCAFT00000003314.4	ENSCAFT00000003314	Transcript	inframe_deletion	86-88	86-88	29-30	SP/S	tCCCcc/tcc	-	MODERATE	CASD1	protein_coding	EXON=1/18		ENSCAFT00000003314.4:c.96_98del	ENSCAFP00000003077.4:p.Pro33del	1	VGNC		ENSCAFP00000003077	10
P1	Indel.LOH	14:20642409-20642409	CCCGC	ENSCAFG00000002118	ENSCAFT00000003345.4	ENSCAFT00000003345	Transcript	frameshift_variant	576-577	576-577	192-193	-/AX	-/GCGGG	-	HIGH	PON3	protein_coding	EXON=1/10		ENSCAFT00000003345.4:c.572_576dup	ENSCAFP00000003105.4:p.His193AlafsTer38	-1	VGNC		ENSCAFP00000003105
P1	Indel.LOH	14:20642409-20642409	CCCGC	ENSCAFG00000002118	ENSCAFT00000086443.1	ENSCAFT00000086443	Transcript	frameshift_variant	576-577	576-577	192-193	-/AX	-/GCGGG	-	HIGH	PON3	protein_coding	EXON=1/10		ENSCAFT00000086443.1:c.572_576dup	ENSCAFP00000056112.1:p.His193AlafsTer38	-1	VGNC		ENSCAFP00000056112
P1	Indel.LOH	14:20671781-20671781	A	ENSCAFG00000002123	ENSCAFT00000084395.1	ENSCAFT00000084395	Transcript	frameshift_variant	137-138	137-138	46	L/FX	tta/ttTa	-	HIGH	PON2	protein_coding	EXON=2/9		ENSCAFT00000084395.1:c.137dup	ENSCAFP00000062002.1:p.Leu46PhefsTer7	-1	VGNC		ENSCAFP00000062002
P1	Indel.LOH	14:23639590-23639591	-	ENSCAFG00000002246	ENSCAFT00000003525.5	ENSCAFT00000003525	Transcript	frameshift_variant	1054	672	224	H/X	caT/ca	rs852662189	HIGH	GLCCI1	protein_coding	EXON=8/8		ENSCAFT00000003525.5:c.681del	ENSCAFP00000003267.4:p.Leu228PhefsTer3	1	VGNC		ENSCAFP00000003267	9
P1	Indel.LOH	14:23699641-23699643	-	ENSCAFG00000002257	ENSCAFT00000003545.5	ENSCAFT00000003545	Transcript	splice_donor_variant	-	-	-	-	-	rs852999958	HIGH	ICA1	protein_coding		INTRON=10/15	ENSCAFT00000003545.5:c.989+1_989+2del		-1	VGNC		ENSCAFP00000003284
P1	Indel.LOH	14:27202437-27202438	-	ENSCAFG00000002308	ENSCAFT00000075496.1	ENSCAFT00000075496	Transcript	frameshift_variant	5245	5032	1678	W/X	Tgg/gg	-	HIGH	VWDE	protein_coding	EXON=31/31		ENSCAFT00000075496.1:c.5032del	ENSCAFP00000053364.1:p.Trp1678GlyfsTer9	-1	VGNC		ENSCAFP00000053364
P1	Indel.Somatic	14:32150458-32150458	A	ENSCAFG00000046726	ENSCAFT00000089906.1	ENSCAFT00000089906	Transcript	frameshift_variant	1140-1141	1140-1141	380-381	-/X	-/T	-	HIGH		protein_coding	EXON=1/1		ENSCAFT00000089906.1:c.1140dup	ENSCAFP00000062575.1:p.Ile381TyrfsTer4	-1			ENSCAFP00000062575
P1	Indel.LOH	14:33061927-33061928	-	ENSCAFG00000002498	ENSCAFT00000061189.1	ENSCAFT00000061189	Transcript	frameshift_variant	2250	2250	750	S/X	agT/ag	rs852790898	HIGH	HDAC9	protein_coding	EXON=16/16		ENSCAFT00000061189.1:c.2257del	ENSCAFP00000058172.1:p.Tyr753ThrfsTer?	1	VGNC		ENSCAFP00000058172	7
P1	Indel.LOH	14:37824467-37824468	-	ENSCAFG00000002801	ENSCAFT00000004474.4	ENSCAFT00000004474	Transcript	frameshift_variant	608	343	115	G/X	Ggg/gg	-	HIGH	NPY	protein_coding	EXON=1/3		ENSCAFT00000004474.4:c.348del	ENSCAFP00000004135.4:p.Arg117AlafsTer47	1	VGNC		ENSCAFP00000004135	5
P1	Indel.LOH	14:37824542-37824542	C	ENSCAFG00000002801	ENSCAFT00000004474.4	ENSCAFT00000004474	Transcript	frameshift_variant	682-683	417-418	139-140	-/X	-/C	rs851048410	HIGH	NPY	protein_coding	EXON=1/3		ENSCAFT00000004474.4:c.421dup	ENSCAFP00000004135.4:p.Arg141ProfsTer15	1	VGNC		ENSCAFP00000004135	4
P1	Indel.LOH	14:56585850-56585856	-	ENSCAFG00000003432	ENSCAFT00000005522.4	ENSCAFT00000005522	Transcript	inframe_deletion	1575-1580	1575-1580	525-527	APA/A	gcGCCCGCc/gcc	-	MODERATE	CTTNBP2	protein_coding	EXON=3/21		ENSCAFT00000005522.4:c.1575_1580del	ENSCAFP00000005116.4:p.Pro526_Ala527del	-1	VGNC		ENSCAFP00000005116
P1	Indel.LOH	14:56585850-56585856	-	ENSCAFG00000003432	ENSCAFT00000047010.3	ENSCAFT00000047010	Transcript	inframe_deletion	1575-1580	1575-1580	525-527	APA/A	gcGCCCGCc/gcc	-	MODERATE	CTTNBP2	protein_coding	EXON=3/23		ENSCAFT00000047010.3:c.1575_1580del	ENSCAFP00000042843.2:p.Pro526_Ala527del	-1	VGNC		ENSCAFP00000042843
P1	Indel.LOH	14:56585850-56585856	-	ENSCAFG00000003432	ENSCAFT00000091339.1	ENSCAFT00000091339	Transcript	inframe_deletion	1575-1580	1575-1580	525-527	APA/A	gcGCCCGCc/gcc	-	MODERATE	CTTNBP2	protein_coding	EXON=3/21		ENSCAFT00000091339.1:c.1575_1580del	ENSCAFP00000045720.1:p.Pro526_Ala527del	-1	VGNC		ENSCAFP00000045720
P1	Indel.LOH	14:56585850-56585856	-	ENSCAFG00000003432	ENSCAFT00000084501.1	ENSCAFT00000084501	Transcript	inframe_deletion	1745-1750	1194-1199	398-400	APA/A	gcGCCCGCc/gcc	-	MODERATE	CTTNBP2	protein_coding	EXON=4/23		ENSCAFT00000084501.1:c.1194_1199del	ENSCAFP00000064412.1:p.Pro399_Ala400del	-1	VGNC		ENSCAFP00000064412
P1	Indel.LOH	14:7958683-7958698	-	ENSCAFG00000032016	ENSCAFT00000049611.2	ENSCAFT00000049611	Transcript	inframe_deletion	100-114	100-114	34-38	PLLGS/-	CCATTGCTGGGGAGC/-	rs852060177	MODERATE		protein_coding	EXON=1/1		ENSCAFT00000049611.2:c.100_114del	ENSCAFP00000053885.1:p.Pro34_Ser38del	-1			ENSCAFP00000053885
P1	Indel.Somatic	15:23049088-23049116	-	ENSCAFG00000005808	ENSCAFT00000009368.4	ENSCAFT00000009368	Transcript	frameshift_variant	505-532	505-532	169-178	HLSHLSCLSP/X	CATCTCTCCCATCTCTCCTGTCTCTCCCca/ca	-	HIGH	MYF5	protein_coding	EXON=1/3		ENSCAFT00000009368.4:c.523_550del	ENSCAFP00000008695.4:p.Cys175ProfsTer71	1	VGNC		ENSCAFP00000008695	18
P1	Indel.LOH	17:19863775-19863776	-	ENSCAFG00000004223	ENSCAFT00000006795.4	ENSCAFT00000006795	Transcript	frameshift_variant	420	420	140	R/X	cgT/cg	-	HIGH		protein_coding	EXON=1/18		ENSCAFT00000006795.4:c.420del	ENSCAFP00000006289.4:p.Leu141SerfsTer37	-1			ENSCAFP00000006289
P1	Indel.LOH	17:19863775-19863776	-	ENSCAFG00000004223	ENSCAFT00000046797.2	ENSCAFT00000046797	Transcript	frameshift_variant	420	420	140	R/X	cgT/cg	-	HIGH		protein_coding	EXON=1/18		ENSCAFT00000046797.2:c.420del	ENSCAFP00000036488.2:p.Leu141SerfsTer37	-1			ENSCAFP00000036488
P1	Indel.LOH	17:19863775-19863776	-	ENSCAFG00000004223	ENSCAFT00000069431.1	ENSCAFT00000069431	Transcript	frameshift_variant	420	420	140	R/X	cgT/cg	-	HIGH		protein_coding	EXON=1/18		ENSCAFT00000069431.1:c.420del	ENSCAFP00000046310.1:p.Leu141SerfsTer37	-1			ENSCAFP00000046310
P1	Indel.LOH	17:19863775-19863776	-	ENSCAFG00000004223	ENSCAFT00000061144.1	ENSCAFT00000061144	Transcript	frameshift_variant	420	420	140	R/X	cgT/cg	-	HIGH		protein_coding	EXON=1/20		ENSCAFT00000061144.1:c.420del	ENSCAFP00000048432.1:p.Leu141SerfsTer37	-1			ENSCAFP00000048432
P1	Indel.LOH	17:19863775-19863776	-	ENSCAFG00000004223	ENSCAFT00000090804.1	ENSCAFT00000090804	Transcript	frameshift_variant	420	420	140	R/X	cgT/cg	-	HIGH		protein_coding	EXON=1/19		ENSCAFT00000090804.1:c.420del	ENSCAFP00000052661.1:p.Leu141SerfsTer37	-1			ENSCAFP00000052661
P1	Indel.LOH	17:19863775-19863776	-	ENSCAFG00000004223	ENSCAFT00000076343.1	ENSCAFT00000076343	Transcript	frameshift_variant	420	420	140	R/X	cgT/cg	-	HIGH		protein_coding	EXON=1/19		ENSCAFT00000076343.1:c.420del	ENSCAFP00000056350.1:p.Leu141SerfsTer37	-1			ENSCAFP00000056350
P1	Indel.LOH	17:19863775-19863776	-	ENSCAFG00000004223	ENSCAFT00000075190.1	ENSCAFT00000075190	Transcript	frameshift_variant	420	420	140	R/X	cgT/cg	-	HIGH		protein_coding	EXON=1/18		ENSCAFT00000075190.1:c.420del	ENSCAFP00000057333.1:p.Leu141SerfsTer37	-1			ENSCAFP00000057333
P1	Indel.LOH	17:37729596-37729602	-	ENSCAFG00000007370	ENSCAFT00000011774.3	ENSCAFT00000011774	Transcript	inframe_deletion	228-233	228-233	76-78	FSS/F	ttCAGCAGc/ttc	-	MODERATE		protein_coding	EXON=1/3		ENSCAFT00000011774.3:c.231_236del	ENSCAFP00000010913.3:p.Ser78_Ser79del	1			ENSCAFP00000010913	3
P1	Indel.LOH	17:37729596-37729602	-	ENSCAFG00000007370	ENSCAFT00000011797.4	ENSCAFT00000011797	Transcript	inframe_deletion	228-233	228-233	76-78	FSS/F	ttCAGCAGc/ttc	-	MODERATE		protein_coding	EXON=1/3		ENSCAFT00000011797.4:c.231_236del	ENSCAFP00000010936.4:p.Ser78_Ser79del	1			ENSCAFP00000010936	3
P1	Indel.LOH	17:37729596-37729602	-	ENSCAFG00000007370	ENSCAFT00000076055.1	ENSCAFT00000076055	Transcript	inframe_deletion	171-176	171-176	57-59	FSS/F	ttCAGCAGc/ttc	-	MODERATE		protein_coding	EXON=2/4		ENSCAFT00000076055.1:c.174_179del	ENSCAFP00000057356.1:p.Ser59_Ser60del	1			ENSCAFP00000057356	3
P1	Indel.LOH	17:37729607-37729607	A	ENSCAFG00000007370	ENSCAFT00000011774.3	ENSCAFT00000011774	Transcript	frameshift_variant	238-239	238-239	80	G/EX	gga/gAga	rs852027546	HIGH		protein_coding	EXON=1/3		ENSCAFT00000011774.3:c.238_239insA	ENSCAFP00000010913.3:p.Gly80GlufsTer16	1			ENSCAFP00000010913
P1	Indel.LOH	17:37729607-37729607	A	ENSCAFG00000007370	ENSCAFT00000011797.4	ENSCAFT00000011797	Transcript	frameshift_variant	238-239	238-239	80	G/EX	gga/gAga	rs852027546	HIGH		protein_coding	EXON=1/3		ENSCAFT00000011797.4:c.238_239insA	ENSCAFP00000010936.4:p.Gly80GlufsTer16	1			ENSCAFP00000010936
P1	Indel.LOH	17:37729607-37729607	A	ENSCAFG00000007370	ENSCAFT00000076055.1	ENSCAFT00000076055	Transcript	frameshift_variant	181-182	181-182	61	G/EX	gga/gAga	rs852027546	HIGH		protein_coding	EXON=2/4		ENSCAFT00000076055.1:c.181_182insA	ENSCAFP00000057356.1:p.Gly61GlufsTer16	1			ENSCAFP00000057356
P1	Indel.LOH	2:82341527-82341527	AA	ENSCAFG00000041951	ENSCAFT00000087078.1	ENSCAFT00000087078	Transcript	frameshift_variant	1126-1127	1126-1127	376	W/FX	tgg/tTTgg	-	HIGH		protein_coding	EXON=4/4		ENSCAFT00000087078.1:c.1125_1126dup	ENSCAFP00000049399.1:p.Trp376PhefsTer?	-1			ENSCAFP00000049399
P1	Indel.LOH	20:18857742-18857742	GCGGCA	ENSCAFG00000030541	ENSCAFT00000043571.2	ENSCAFT00000043571	Transcript	inframe_insertion	1240-1241	1240-1241	414	G/GGS	ggc/gGCGGCAgc	rs852932872	MODERATE	PDZRN3	protein_coding	EXON=7/7		ENSCAFT00000043571.2:c.1246_1251dup	ENSCAFP00000038623.2:p.Ser416_Gly417dup	1	VGNC		ENSCAFP00000038623	11
P1	Indel.LOH	20:18857742-18857742	GCGGCA	ENSCAFG00000030541	ENSCAFT00000089431.1	ENSCAFT00000089431	Transcript	inframe_insertion	2125-2126	2125-2126	709	G/GGS	ggc/gGCGGCAgc	rs852932872	MODERATE	PDZRN3	protein_coding	EXON=11/11		ENSCAFT00000089431.1:c.2131_2136dup	ENSCAFP00000059569.1:p.Ser711_Gly712dup	1	VGNC		ENSCAFP00000059569	11
P1	Indel.LOH	20:55172220-55172220	CCGCCCCCGCCG	ENSCAFG00000019014	ENSCAFT00000030197.4	ENSCAFT00000030197	Transcript	inframe_insertion	1993-1994	1993-1994	665	P/PAPAA	ccc/cCCGCCCCCGCCGcc	-	MODERATE	SEMA6B	protein_coding	EXON=16/16		ENSCAFT00000030197.4:c.1998_1999insCCCGCCGCCGCC	ENSCAFP00000028061.4:p.Ala666_Ala667insProAlaAlaAla	1	VGNC		ENSCAFP00000028061	5
P1	Indel.LOH	20:55172220-55172220	CCGCCCCCGCCG	ENSCAFG00000019014	ENSCAFT00000090911.1	ENSCAFT00000090911	Transcript	inframe_insertion	1972-1973	1972-1973	658	P/PAPAA	ccc/cCCGCCCCCGCCGcc	-	MODERATE	SEMA6B	protein_coding	EXON=16/16		ENSCAFT00000090911.1:c.1977_1978insCCCGCCGCCGCC	ENSCAFP00000050455.1:p.Ala659_Ala660insProAlaAlaAla	1	VGNC		ENSCAFP00000050455	5
P1	Indel.LOH	20:55172220-55172220	CCGCCCCCGCCG	ENSCAFG00000019014	ENSCAFT00000082845.1	ENSCAFT00000082845	Transcript	inframe_insertion	1921-1922	1921-1922	641	P/PAPAA	ccc/cCCGCCCCCGCCGcc	-	MODERATE	SEMA6B	protein_coding	EXON=15/15		ENSCAFT00000082845.1:c.1926_1927insCCCGCCGCCGCC	ENSCAFP00000059309.1:p.Ala642_Ala643insProAlaAlaAla	1	VGNC		ENSCAFP00000059309	5
P1	Indel.LOH	20:57743492-57743492	GGG	ENSCAFG00000019648	ENSCAFT00000047485.2	ENSCAFT00000047485	Transcript	inframe_insertion	2242-2243	2115-2116	705-706	-/G	-/GGG	-	MODERATE	TMEM259	protein_coding	EXON=12/12		ENSCAFT00000047485.2:c.2126_2128dup	ENSCAFP00000041131.2:p.Gly709dup	1	VGNC		ENSCAFP00000041131	13
P1	Indel.LOH	21:18420749-18420750	-	ENSCAFG00000041137	ENSCAFT00000085892.1	ENSCAFT00000085892	Transcript	frameshift_variant	1472	1472	491	A/X	gCa/ga	-	HIGH		protein_coding	EXON=1/1		ENSCAFT00000085892.1:c.1472del	ENSCAFP00000058731.1:p.Ala491GlufsTer4	1			ENSCAFP00000058731
P1	Indel.LOH	22:38784361-38784361	T	ENSCAFG00000005292	ENSCAFT00000008530.3	ENSCAFT00000008530	Transcript	frameshift_variant	758-759	565-566	189	I/IX	att/aTtt	rs852830764	HIGH		protein_coding	EXON=1/2		ENSCAFT00000008530.3:c.567dup	ENSCAFP00000041974.2:p.Ala190CysfsTer4	1			ENSCAFP00000041974	2
P1	Indel.LOH	23:7899209-7899211	-	ENSCAFG00000004959	ENSCAFT00000068809.1	ENSCAFT00000068809	Transcript	frameshift_variant	331-332	331-332	111	R/X	CGg/g	-	HIGH	ACAA1	protein_coding	EXON=1/10		ENSCAFT00000068809.1:c.331_332del	ENSCAFP00000063723.1:p.Arg111GlyfsTer34	-1	VGNC		ENSCAFP00000063723
P1	Indel.LOH	24:32910785-32910786	-	ENSCAFG00000030127	ENSCAFT00000044834.1	ENSCAFT00000044834	Transcript	frameshift_variant	75	13	5	A/X	Gct/ct	-	HIGH	WFDC10A	protein_coding	EXON=1/2		ENSCAFT00000044834.1:c.13del	ENSCAFP00000035838.1:p.Ala5LeufsTer30	-1	HGNC	WFDC10A	ENSCAFP00000035838
P1	Indel.LOH	25:3856914-3856915	-	ENSCAFG00000041493	ENSCAFT00000088011.1	ENSCAFT00000088011	Transcript	frameshift_variant	334	334	112	A/X	Gca/ca	-	HIGH		protein_coding	EXON=1/1		ENSCAFT00000088011.1:c.334del	ENSCAFP00000063182.1:p.Ala112HisfsTer7	1			ENSCAFP00000063182
P1	Indel.LOH	26:22732974-22732998	-	ENSCAFG00000012243	ENSCAFT00000019446.5	ENSCAFT00000019446	Transcript	inframe_deletion	1953-1976	1886-1909	629-637	KAKSPVKEE/K	aAGGCCAAGTCCCCAGTGAAGGAGGag/aag	rs852544148	MODERATE	NEFH	protein_coding	EXON=4/4		ENSCAFT00000019446.5:c.1901_1924del	ENSCAFP00000018040.3:p.Val634_Pro641del	1	VGNC		ENSCAFP00000018040	15
P1	Indel.Somatic	26:27354562-27354562	CTCTCACCCT	ENSCAFG00000043925	ENSCAFT00000088700.1	ENSCAFT00000088700	Transcript	frameshift_variant	640-641	398-399	133	T/TSHPX	acc/acCTCTCACCCTc	-	HIGH		protein_coding	EXON=2/2		ENSCAFT00000088700.1:c.403_404insACCCTCTCTC	ENSCAFP00000050654.1:p.Leu135HisfsTer23	1			ENSCAFP00000050654	5
P1	Indel.LOH	26:9069232-9069236	-	ENSCAFG00000008601	ENSCAFT00000013635.5	ENSCAFT00000013635	Transcript	frameshift_variant	1895-1898	1232-1235	411-412	RQ/X	cGGCAg/cg	-	HIGH	SH2B3	protein_coding	EXON=6/8		ENSCAFT00000013635.5:c.1233_1236del	ENSCAFP00000012613.5:p.Gln412ValfsTer17	1	VGNC		ENSCAFP00000012613	1
P1	Indel.Somatic	27:33373638-33373638	CCTAGCCCCG	ENSCAFG00000013215	ENSCAFT00000020959.4	ENSCAFT00000020959	Transcript	stop_gained,frameshift_variant	500-501	415-416	139	P/P*PRX	ccc/cCCTAGCCCCGcc	-	HIGH	GPRC5D	protein_coding	EXON=3/6		ENSCAFT00000020959.4:c.417_418insTAGCCCCGCC	ENSCAFP00000019460.4:p.Pro140Ter	1	VGNC		ENSCAFP00000019460	2
P1	Indel.Somatic	27:33373638-33373638	CCTAGCCCCG	ENSCAFG00000013215	ENSCAFT00000039797.3	ENSCAFT00000039797	Transcript	stop_gained,frameshift_variant	97-98	97-98	33	P/P*PRX	ccc/cCCTAGCCCCGcc	-	HIGH	GPRC5D	protein_coding	EXON=1/6		ENSCAFT00000039797.3:c.99_100insTAGCCCCGCC	ENSCAFP00000035696.3:p.Pro34Ter	1	VGNC		ENSCAFP00000035696	2
P1	Indel.Somatic	27:33373638-33373638	CCTAGCCCCG	ENSCAFG00000013215	ENSCAFT00000062243.1	ENSCAFT00000062243	Transcript	stop_gained,frameshift_variant	97-98	97-98	33	P/P*PRX	ccc/cCCTAGCCCCGcc	-	HIGH	GPRC5D	protein_coding	EXON=1/7		ENSCAFT00000062243.1:c.99_100insTAGCCCCGCC	ENSCAFP00000059428.1:p.Pro34Ter	1	VGNC		ENSCAFP00000059428	2
P1	Indel.LOH	27:38367848-38367878	-	ENSCAFG00000014740	ENSCAFT00000023420.4	ENSCAFT00000023420	Transcript	inframe_deletion	1521-1550	1456-1485	486-495	AQAQAQAQAQ/-	GCCCAGGCCCAGGCCCAGGCCCAGGCTCAA/-	-	MODERATE	ZNF384	protein_coding	EXON=10/10		ENSCAFT00000023420.4:c.1458_1487del	ENSCAFP00000021750.3:p.Gln493_Ala502del	1	VGNC		ENSCAFP00000021750	2
P1	Indel.LOH	27:38367848-38367878	-	ENSCAFG00000014740	ENSCAFT00000090145.1	ENSCAFT00000090145	Transcript	splice_acceptor_variant,splice_donor_variant,inframe_deletion,intron_variant	1987-1998	1456-1467	486-489	AQAQAQAQAQ/-	GCCCAGGCCCAGGCCCAGGCCCAGGCTCAA/-	-	HIGH	ZNF384	protein_coding	EXON=11-12/12	INTRON=11/11	ENSCAFT00000090145.1:c.1458_1469del	ENSCAFP00000043567.1:p.Gln493_Ala496del	1	VGNC		ENSCAFP00000043567	2
P1	Indel.LOH	27:38367848-38367878	-	ENSCAFG00000014740	ENSCAFT00000093325.1	ENSCAFT00000093325	Transcript	splice_acceptor_variant,splice_donor_variant,inframe_deletion,intron_variant	1639-1650	1108-1119	370-373	AQAQAQAQAQ/-	GCCCAGGCCCAGGCCCAGGCCCAGGCTCAA/-	-	HIGH	ZNF384	protein_coding	EXON=9-10/10	INTRON=9/9	ENSCAFT00000093325.1:c.1110_1121del	ENSCAFP00000047585.1:p.Gln377_Ala380del	1	VGNC		ENSCAFP00000047585	2
P1	Indel.LOH	27:38367848-38367878	-	ENSCAFG00000014740	ENSCAFT00000069282.1	ENSCAFT00000069282	Transcript	inframe_deletion	1338-1367	1273-1302	425-434	AQAQAQAQAQ/-	GCCCAGGCCCAGGCCCAGGCCCAGGCTCAA/-	-	MODERATE	ZNF384	protein_coding	EXON=9/9		ENSCAFT00000069282.1:c.1275_1304del	ENSCAFP00000060518.1:p.Gln432_Ala441del	1	VGNC		ENSCAFP00000060518	2
P1	Indel.LOH	27:6537321-6537322	-	ENSCAFG00000045440	ENSCAFT00000088091.1	ENSCAFT00000088091	Transcript	frameshift_variant	926	926	309	Y/X	tAt/tt	rs851877212	HIGH		protein_coding	EXON=4/4		ENSCAFT00000088091.1:c.926del	ENSCAFP00000056805.1:p.Tyr309LeufsTer5	1			ENSCAFP00000056805
P1	Indel.LOH	27:6537321-6537322	-	ENSCAFG00000045440	ENSCAFT00000064957.1	ENSCAFT00000064957	Transcript	frameshift_variant	929	929	310	Y/X	tAt/tt	rs851877212	HIGH		protein_coding	EXON=4/4		ENSCAFT00000064957.1:c.929del	ENSCAFP00000057523.1:p.Tyr310LeufsTer5	1			ENSCAFP00000057523
P1	Indel.LOH	28:16361641-16361644	-	ENSCAFG00000010547	ENSCAFT00000072382.1	ENSCAFT00000072382	Transcript	inframe_deletion	2321-2323	2321-2323	774-775	EG/G	gAAGgg/ggg	rs851123220	MODERATE	COL17A1	protein_coding	EXON=20/36		ENSCAFT00000072382.1:c.2321_2323del	ENSCAFP00000057779.1:p.Glu774del	-1	VGNC		ENSCAFP00000057779
P1	Indel.LOH	28:25816770-25816770	CGGCGGCGGCGG	ENSCAFG00000011725	ENSCAFT00000018678.5	ENSCAFT00000018678	Transcript	inframe_insertion	431-432	74-75	25	V/VGGGG	gtc/gtCGGCGGCGGCGGc	-	MODERATE	ATRNL1	protein_coding	EXON=1/29		ENSCAFT00000018678.5:c.75_76insGGCGGCGGCGGC	ENSCAFP00000017303.4:p.Val25_Arg26insGlyGlyGlyGly	1	VGNC		ENSCAFP00000017303	1
P1	Indel.LOH	28:25816770-25816770	CGGCGGCGGCGG	ENSCAFG00000011725	ENSCAFT00000059657.1	ENSCAFT00000059657	Transcript	inframe_insertion	431-432	74-75	25	V/VGGGG	gtc/gtCGGCGGCGGCGGc	-	MODERATE	ATRNL1	protein_coding	EXON=1/27		ENSCAFT00000059657.1:c.75_76insGGCGGCGGCGGC	ENSCAFP00000045513.1:p.Val25_Arg26insGlyGlyGlyGly	1	VGNC		ENSCAFP00000045513	1
P1	Indel.LOH	28:25816770-25816770	CGGCGGCGGCGG	ENSCAFG00000011725	ENSCAFT00000075464.1	ENSCAFT00000075464	Transcript	inframe_insertion	431-432	74-75	25	V/VGGGG	gtc/gtCGGCGGCGGCGGc	-	MODERATE	ATRNL1	protein_coding	EXON=1/7		ENSCAFT00000075464.1:c.75_76insGGCGGCGGCGGC	ENSCAFP00000048503.1:p.Val25_Arg26insGlyGlyGlyGly	1	VGNC		ENSCAFP00000048503	1
P1	Indel.LOH	28:25816770-25816770	CGGCGGCGGCGG	ENSCAFG00000011725	ENSCAFT00000090343.1	ENSCAFT00000090343	Transcript	inframe_insertion	431-432	74-75	25	V/VGGGG	gtc/gtCGGCGGCGGCGGc	-	MODERATE	ATRNL1	protein_coding	EXON=1/28		ENSCAFT00000090343.1:c.75_76insGGCGGCGGCGGC	ENSCAFP00000049119.1:p.Val25_Arg26insGlyGlyGlyGly	1	VGNC		ENSCAFP00000049119	1
P1	Indel.LOH	28:25816770-25816770	CGGCGGCGGCGG	ENSCAFG00000011725	ENSCAFT00000085240.1	ENSCAFT00000085240	Transcript	inframe_insertion	431-432	74-75	25	V/VGGGG	gtc/gtCGGCGGCGGCGGc	-	MODERATE	ATRNL1	protein_coding	EXON=1/28		ENSCAFT00000085240.1:c.75_76insGGCGGCGGCGGC	ENSCAFP00000056723.1:p.Val25_Arg26insGlyGlyGlyGly	1	VGNC		ENSCAFP00000056723	1
P1	Indel.LOH	28:25816770-25816770	CGGCGGCGGCGG	ENSCAFG00000011725	ENSCAFT00000063164.1	ENSCAFT00000063164	Transcript	inframe_insertion	431-432	74-75	25	V/VGGGG	gtc/gtCGGCGGCGGCGGc	-	MODERATE	ATRNL1	protein_coding	EXON=1/27		ENSCAFT00000063164.1:c.75_76insGGCGGCGGCGGC	ENSCAFP00000060793.1:p.Val25_Arg26insGlyGlyGlyGly	1	VGNC		ENSCAFP00000060793	1
P1	Indel.LOH	28:33808713-33808713	CGCCGCCGC	ENSCAFG00000031292	ENSCAFT00000044859.2	ENSCAFT00000044859	Transcript	inframe_insertion	1053-1054	760-761	254	A/GGGA	gcg/gGCGGCGGCGcg	-	MODERATE	NKX1-2	protein_coding	EXON=2/2		ENSCAFT00000044859.2:c.752_760dup	ENSCAFP00000042357.1:p.Gly251_Gly253dup	-1	VGNC		ENSCAFP00000042357
P1	Indel.LOH	28:33858444-33858444	G	ENSCAFG00000046022	ENSCAFT00000080863.1	ENSCAFT00000080863	Transcript	frameshift_variant	360-361	360-361	120-121	-/X	-/G	rs852446143	HIGH		protein_coding	EXON=2/2		ENSCAFT00000080863.1:c.362dup	ENSCAFP00000064917.1:p.Gln122SerfsTer35	1			ENSCAFP00000064917	2
P1	Indel.LOH	28:34943435-34943467	-	ENSCAFG00000012857	ENSCAFT00000060110.1	ENSCAFT00000060110	Transcript	frameshift_variant	850-881	167-198	56-66	LTPGRAHAGGH/X	cTGACACCGGGACGTGCACACGCAGGTGGGCAC/c	-	HIGH	MMP21	protein_coding	EXON=1/6		ENSCAFT00000060110.1:c.167_198del	ENSCAFP00000053842.1:p.Leu56ProfsTer183	-1	VGNC		ENSCAFP00000053842
P1	Indel.LOH	28:36918697-36918697	CTT	ENSCAFG00000013255	ENSCAFT00000021024.4	ENSCAFT00000021024	Transcript	inframe_insertion	4886-4887	4457-4458	1486	R/RR	agg/agAAGg	-	MODERATE	MKI67	protein_coding	EXON=12/16		ENSCAFT00000021024.4:c.4457_4458insAAG	ENSCAFP00000019524.4:p.Arg1486dup	-1	VGNC		ENSCAFP00000019524
P1	Indel.LOH	28:36918697-36918697	CTT	ENSCAFG00000013255	ENSCAFT00000092731.1	ENSCAFT00000092731	Transcript	inframe_insertion	4859-4860	4430-4431	1477	R/RR	agg/agAAGg	-	MODERATE	MKI67	protein_coding	EXON=12/15		ENSCAFT00000092731.1:c.4430_4431insAAG	ENSCAFP00000062450.1:p.Arg1477dup	-1	VGNC		ENSCAFP00000062450
P1	Indel.Somatic	29:31760839-31760839	C	ENSCAFG00000042472	ENSCAFT00000060363.1	ENSCAFT00000060363	Transcript	frameshift_variant	100-101	100-101	34	A/GX	gcg/gGcg	-	HIGH		protein_coding	EXON=2/4		ENSCAFT00000060363.1:c.100dup	ENSCAFP00000050768.1:p.Ala34GlyfsTer12	-1			ENSCAFP00000050768
P1	Indel.Somatic	3:28481928-28481936	-	ENSCAFG00000009207	ENSCAFT00000082659.1	ENSCAFT00000082659	Transcript	frameshift_variant	892-899	43963	43865	RAG/X	cGCGCGGGG/c	-	HIGH	AP3B1	protein_coding	EXON=1/27		ENSCAFT00000082659.1:c.14_21del	ENSCAFP00000046583.1:p.Ala5GlyfsTer65	1	VGNC		ENSCAFP00000046583	9
P1	Indel.Somatic	3:28481928-28481936	-	ENSCAFG00000009207	ENSCAFT00000093959.1	ENSCAFT00000093959	Transcript	frameshift_variant	892-899	43963	43865	RAG/X	cGCGCGGGG/c	-	HIGH	AP3B1	protein_coding	EXON=1/25		ENSCAFT00000093959.1:c.14_21del	ENSCAFP00000053371.1:p.Ala5GlyfsTer65	1	VGNC		ENSCAFP00000053371	9
P1	Indel.Somatic	3:28481928-28481936	-	ENSCAFG00000009207	ENSCAFT00000070008.1	ENSCAFT00000070008	Transcript	frameshift_variant	892-899	43963	43865	RAG/X	cGCGCGGGG/c	-	HIGH	AP3B1	protein_coding	EXON=1/28		ENSCAFT00000070008.1:c.14_21del	ENSCAFP00000056696.1:p.Ala5GlyfsTer65	1	VGNC		ENSCAFP00000056696	9
P1	Indel.Somatic	3:28481928-28481936	-	ENSCAFG00000009207	ENSCAFT00000074830.1	ENSCAFT00000074830	Transcript	frameshift_variant	892-899	43963	43865	RAG/X	cGCGCGGGG/c	-	HIGH	AP3B1	protein_coding	EXON=1/27		ENSCAFT00000074830.1:c.14_21del	ENSCAFP00000061277.1:p.Ala5GlyfsTer65	1	VGNC		ENSCAFP00000061277	9
P1	Indel.Somatic	3:28481928-28481936	-	ENSCAFG00000009207	ENSCAFT00000082100.1	ENSCAFT00000082100	Transcript	frameshift_variant	892-899	43963	43865	RAG/X	cGCGCGGGG/c	-	HIGH	AP3B1	protein_coding	EXON=1/28		ENSCAFT00000082100.1:c.14_21del	ENSCAFP00000061943.1:p.Ala5GlyfsTer65	1	VGNC		ENSCAFP00000061943	9
P1	Indel.Somatic	3:28481928-28481936	-	ENSCAFG00000009207	ENSCAFT00000074321.1	ENSCAFT00000074321	Transcript	frameshift_variant	892-899	43963	43865	RAG/X	cGCGCGGGG/c	-	HIGH	AP3B1	protein_coding	EXON=1/27		ENSCAFT00000074321.1:c.14_21del	ENSCAFP00000066261.1:p.Ala5GlyfsTer65	1	VGNC		ENSCAFP00000066261	9
P1	Indel.Somatic	3:28481928-28481936	-	ENSCAFG00000009207	ENSCAFT00000060149.1	ENSCAFT00000060149	Transcript	frameshift_variant	892-899	43963	43865	RAG/X	cGCGCGGGG/c	-	HIGH	AP3B1	protein_coding	EXON=1/27		ENSCAFT00000060149.1:c.14_21del	ENSCAFP00000066391.1:p.Ala5GlyfsTer65	1	VGNC		ENSCAFP00000066391	9
P1	Indel.LOH	3:56727620-56727620	C	ENSCAFG00000013863	ENSCAFT00000065721.1	ENSCAFT00000065721	Transcript	frameshift_variant	5796-5797	4927-4928	1643	A/GX	gcg/gGcg	-	HIGH	CEMIP	protein_coding	EXON=31/31		ENSCAFT00000065721.1:c.4927dup	ENSCAFP00000062532.1:p.Ala1643GlyfsTer81	-1	VGNC		ENSCAFP00000062532
P1	Indel.LOH	31:11855821-11855821	AAAAAAAAA	ENSCAFG00000008092	ENSCAFT00000012894.4	ENSCAFT00000012894	Transcript	inframe_insertion	4048-4049	3502-3503	1168	C/FFFC	tgc/tTTTTTTTTTgc	-	MODERATE	NRIP1	protein_coding	EXON=4/4		ENSCAFT00000012894.4:c.3494_3502dup	ENSCAFP00000011935.4:p.Phe1165_Phe1167dup	-1	VGNC		ENSCAFP00000011935
P1	Indel.LOH	31:36034404-36034419	-	ENSCAFG00000048426	ENSCAFT00000046643.2	ENSCAFT00000046643	Transcript	inframe_deletion	157-171	157-171	53-57	PVCCK/-	CCCGTATGCTGCAAG/-	rs850912933	MODERATE		protein_coding	EXON=3/4		ENSCAFT00000046643.2:c.162_176del	ENSCAFP00000040520.2:p.Lys57_Cys61del	1			ENSCAFP00000040520	5
P1	Indel.Somatic	32:11021135-11021136	-	ENSCAFG00000044575	ENSCAFT00000063924.1	ENSCAFT00000063924	Transcript	frameshift_variant	1959	1714	572	K/X	Aag/ag	-	HIGH		protein_coding	EXON=4/4		ENSCAFT00000063924.1:c.1715del	ENSCAFP00000053612.1:p.Lys572SerfsTer?	1			ENSCAFP00000053612	1
P1	Indel.Somatic	32:11021139-11021141	-	ENSCAFG00000044575	ENSCAFT00000063924.1	ENSCAFT00000063924	Transcript	frameshift_variant	1963-1964	1718-1719	573	S/X	tCA/t	-	HIGH		protein_coding	EXON=4/4		ENSCAFT00000063924.1:c.1718_1719del	ENSCAFP00000053612.1:p.Ser573Ter	1			ENSCAFP00000053612
P1	Indel.LOH	37:1433815-1433815	GGGCGC	ENSCAFG00000009513	ENSCAFT00000015115.5	ENSCAFT00000015115	Transcript	inframe_insertion	418-419	386-387	129	G/GGA	ggg/ggGGGCGCg	-	MODERATE	GLS	protein_coding	EXON=1/18		ENSCAFT00000015115.5:c.398_403dup	ENSCAFP00000013987.4:p.Ala133_Gly134dup	1	VGNC		ENSCAFP00000013987	17
P1	Indel.LOH	37:1433815-1433815	GGGCGC	ENSCAFG00000009513	ENSCAFT00000091006.1	ENSCAFT00000091006	Transcript	inframe_insertion	418-419	386-387	129	G/GGA	ggg/ggGGGCGCg	-	MODERATE	GLS	protein_coding	EXON=1/16		ENSCAFT00000091006.1:c.398_403dup	ENSCAFP00000065597.1:p.Ala133_Gly134dup	1	VGNC		ENSCAFP00000065597	17
P1	Indel.Somatic	38:15376028-15376088	-	ENSCAFG00000031609	ENSCAFT00000047625.2	ENSCAFT00000047625	Transcript	inframe_deletion	308-367	308-367	103-123	ERKKERKKERKKERKRKKERK/E	gAAAGAAAGAAAGAAAGAAAGAAAGAAAGAAAGAAAGAAAGAAAGAGAAAGAAAGAAAGAAaa/gaa	-	MODERATE		protein_coding	EXON=1/2		ENSCAFT00000047625.2:c.321_380del	ENSCAFP00000036193.2:p.Arg108_Glu127del	1			ENSCAFP00000036193	13
P1	Indel.LOH	4:65159988-65159988	CCGCAGCCC	ENSCAFG00000018508	ENSCAFT00000029386.5	ENSCAFT00000029386	Transcript	inframe_insertion	3742-3743	2250-2251	750-751	-/PQP	-/CCGCAGCCC	-	MODERATE	HCN1	protein_coding	EXON=8/8		ENSCAFT00000029386.5:c.2258_2259insCCCGCAGCC	ENSCAFP00000027323.5:p.Pro751_Pro753dup	1	VGNC		ENSCAFP00000027323	8
P1	Indel.LOH	4:65536829-65536829	GCGGGC	ENSCAFG00000018516	ENSCAFT00000029402.4	ENSCAFT00000029402	Transcript	inframe_insertion	386-387	386-387	129	A/APA	gcc/gcGCCCGCc	-	MODERATE	MRPS30	protein_coding	EXON=1/5		ENSCAFT00000029402.4:c.381_386dup	ENSCAFP00000027337.3:p.Pro128_Ala129dup	-1	VGNC		ENSCAFP00000027337
P1	Indel.Somatic	5:31859396-31859402	-	ENSCAFG00000015914	ENSCAFT00000025217.4	ENSCAFT00000025217	Transcript	inframe_deletion	2700-2705	2700-2705	900-902	EDF/D	gaAGATTTt/gat	-	MODERATE	PELP1	protein_coding	EXON=17/18		ENSCAFT00000025217.4:c.2700_2705del	ENSCAFP00000023409.4:p.Glu900_Phe902delinsAsp	1	VGNC		ENSCAFP00000023409
P1	Indel.Somatic	5:31859396-31859402	-	ENSCAFG00000015914	ENSCAFT00000074964.1	ENSCAFT00000074964	Transcript	inframe_deletion	2697-2702	2259-2264	753-755	EDF/D	gaAGATTTt/gat	-	MODERATE	PELP1	protein_coding	EXON=17/19		ENSCAFT00000074964.1:c.2259_2264del	ENSCAFP00000062279.1:p.Glu753_Phe755delinsAsp	1	VGNC		ENSCAFP00000062279
P1	Indel.LOH	5:71966219-71966219	G	ENSCAFG00000020027	ENSCAFT00000031870.5	ENSCAFT00000031870	Transcript	frameshift_variant,splice_region_variant	690-691	690-691	230-231	-/X	-/G	-	HIGH	MAF	protein_coding	EXON=2/4		ENSCAFT00000031870.5:c.693+1dup		1	HGNC	MAF	ENSCAFP00000053167
P1	Indel.LOH	5:71966219-71966219	G	ENSCAFG00000020027	ENSCAFT00000064132.1	ENSCAFT00000064132	Transcript	frameshift_variant,splice_region_variant	690-691	690-691	230-231	-/X	-/G	-	HIGH	MAF	protein_coding	EXON=2/5		ENSCAFT00000064132.1:c.693+1dup		1	HGNC	MAF	ENSCAFP00000056549
P1	Indel.Somatic	6:20616962-20616965	-	ENSCAFG00000046641	ENSCAFT00000090017.1	ENSCAFT00000090017	Transcript	inframe_deletion	498-500	449-451	150-151	GA/A	gGGGcc/gcc	-	MODERATE		protein_coding	EXON=1/2		ENSCAFT00000090017.1:c.449_451del	ENSCAFP00000056315.1:p.Gly150del	-1			ENSCAFP00000056315
P1	Indel.Somatic	6:20616974-20616977	-	ENSCAFG00000046641	ENSCAFT00000090017.1	ENSCAFT00000090017	Transcript	inframe_deletion	486-488	437-439	146-147	AG/G	gCCGgg/ggg	-	MODERATE		protein_coding	EXON=1/2		ENSCAFT00000090017.1:c.437_439del	ENSCAFP00000056315.1:p.Ala146del	-1			ENSCAFP00000056315
P1	Indel.LOH	6:40331985-40331986	-	ENSCAFG00000028569	ENSCAFT00000049567.2	ENSCAFT00000049567	Transcript	frameshift_variant	317	317	106	G/X	gGt/gt	-	HIGH		protein_coding	EXON=2/2		ENSCAFT00000049567.2:c.317del	ENSCAFP00000036048.2:p.Gly106ValfsTer59	-1			ENSCAFP00000036048
P1	Indel.LOH	6:40331985-40331986	-	ENSCAFG00000028569	ENSCAFT00000092663.1	ENSCAFT00000092663	Transcript	frameshift_variant	540	317	106	G/X	gGt/gt	-	HIGH		protein_coding	EXON=2/2		ENSCAFT00000092663.1:c.317del	ENSCAFP00000059041.1:p.Gly106ValfsTer59	-1			ENSCAFP00000059041
P1	Indel.LOH	6:69866893-69866896	-	ENSCAFG00000020386	ENSCAFT00000032464.4	ENSCAFT00000032464	Transcript	inframe_deletion	148-150	148-150	50	Q/-	CAG/-	rs850967165	MODERATE	ST6GALNAC5	protein_coding	EXON=2/5		ENSCAFT00000032464.4:c.148_150del	ENSCAFP00000030233.4:p.Gln50del	-1	VGNC		ENSCAFP00000030233
P1	Indel.LOH	7:17928717-17928721	-	ENSCAFG00000013478	ENSCAFT00000077794.1	ENSCAFT00000077794	Transcript	frameshift_variant	3036-3039	2490-2493	830-831	IY/X	atATAT/at	rs852473289	HIGH	EDEM3	protein_coding	EXON=20/20		ENSCAFT00000077794.1:c.2490_2493del	ENSCAFP00000045538.1:p.Ile830MetfsTer16	-1	VGNC		ENSCAFP00000045538
P1	Indel.LOH	7:30279003-30279003	GCGGGG	ENSCAFG00000015268	ENSCAFT00000024289.2	ENSCAFT00000024289	Transcript	inframe_insertion	192-193	192-193	64-65	-/PR	-/CCCCGC	-	MODERATE	TBX19	protein_coding	EXON=1/8		ENSCAFT00000024289.2:c.187_192dup	ENSCAFP00000022547.2:p.Pro63_Arg64dup	-1	VGNC		ENSCAFP00000022547
P1	Indel.Somatic	7:4911514-4911515	-	ENSCAFG00000032715	ENSCAFT00000048039.2	ENSCAFT00000048039	Transcript	frameshift_variant	232	232	78	R/X	Cgg/gg	-	HIGH	C7H1orf53	protein_coding	EXON=1/3		ENSCAFT00000048039.2:c.232del	ENSCAFP00000043015.2:p.Arg78GlyfsTer201	-1	VGNC		ENSCAFP00000043015
P1	Indel.Somatic	9:24812827-24812827	CCT	ENSCAFG00000028513	ENSCAFT00000042839.2	ENSCAFT00000042839	Transcript	inframe_insertion	816-817	488-489	163	G/GG	ggc/ggAGGc	-	MODERATE	HOXB3	protein_coding	EXON=4/6		ENSCAFT00000042839.2:c.488_489insAGG	ENSCAFP00000037349.2:p.Gly167dup	-1	VGNC		ENSCAFP00000037349
P1	Indel.Somatic	9:24812827-24812827	CCT	ENSCAFG00000028513	ENSCAFT00000043809.2	ENSCAFT00000043809	Transcript	inframe_insertion	1411-1412	488-489	163	G/GG	ggc/ggAGGc	-	MODERATE	HOXB3	protein_coding	EXON=4/4		ENSCAFT00000043809.2:c.488_489insAGG	ENSCAFP00000040719.2:p.Gly167dup	-1	VGNC		ENSCAFP00000040719
P1	Indel.LOH	X:76315044-76315048	-	ENSCAFG00000017775	ENSCAFT00000028184.4	ENSCAFT00000028184	Transcript	splice_donor_variant,coding_sequence_variant	1306-?	1306-?	436-?	-	-	-	HIGH	GPRASP1	protein_coding	EXON=1/4	INTRON=1/3	ENSCAFT00000028184.4:c.1306_1307+2del		1	VGNC		ENSCAFP00000041120
P1	Indel.Somatic	X:84634070-84634106	-	ENSCAFG00000045066	ENSCAFT00000082691.1	ENSCAFT00000082691	Transcript	splice_donor_variant,non_coding_transcript_exon_variant,intron_variant	464-?	-	-	-	-	-	HIGH		lncRNA	EXON=3/4	INTRON=3/3	ENSCAFT00000082691.1:n.473+27_473+62del		1
P2	Indel.Somatic	1:112085161-112085162	-	ENSCAFG00000004858	ENSCAFT00000007834.4	ENSCAFT00000007834	Transcript	frameshift_variant	3099	2968	990	V/X	Gta/ta	-	HIGH	CIC	protein_coding	EXON=14/21		ENSCAFT00000007834.4:c.2968del	ENSCAFP00000007261.4:p.Val990Ter	-1	VGNC		ENSCAFP00000007261
P2	Indel.Somatic	1:112085161-112085162	-	ENSCAFG00000004858	ENSCAFT00000083929.1	ENSCAFT00000083929	Transcript	frameshift_variant	4108	4108	1370	V/X	Gta/ta	-	HIGH	CIC	protein_coding	EXON=14/21		ENSCAFT00000083929.1:c.4108del	ENSCAFP00000048321.1:p.Val1370Ter	-1	VGNC		ENSCAFP00000048321
P2	Indel.Somatic	1:112085161-112085162	-	ENSCAFG00000004858	ENSCAFT00000082880.1	ENSCAFT00000082880	Transcript	frameshift_variant	5791	5791	1931	V/X	Gta/ta	-	HIGH	CIC	protein_coding	EXON=14/21		ENSCAFT00000082880.1:c.5791del	ENSCAFP00000051102.1:p.Val1931Ter	-1	VGNC		ENSCAFP00000051102
P2	Indel.LOH	1:72928059-72928062	-	ENSCAFG00000023269	ENSCAFT00000035676.3	ENSCAFT00000035676	Transcript	inframe_deletion	391-393	391-393	131	A/-	GCC/-	-	MODERATE	GAS1	protein_coding	EXON=1/1		ENSCAFT00000035676.3:c.415_417del	ENSCAFP00000030961.3:p.Ala139del	1	VGNC		ENSCAFP00000030961	24
P2	Indel.Somatic	1:82062199-82062199	G	ENSCAFG00000030179	ENSCAFT00000049723.3	ENSCAFT00000049723	Transcript	frameshift_variant	479-480	479-480	160	A/AX	gcg/gcGg	-	HIGH	RFK	protein_coding	EXON=2/5		ENSCAFT00000049723.3:c.483dup	ENSCAFP00000037587.2:p.Arg162AlafsTer85	1	VGNC		ENSCAFP00000037587	4
P2	Indel.Somatic	1:93037348-93037348	GCGGCGGCGGCGGCGGCGGCG	ENSCAFG00000002075	ENSCAFT00000003285.3	ENSCAFT00000003285	Transcript	inframe_insertion	97-98	97-98	33	R/RGGGGGGG	cgc/cGCGGCGGCGGCGGCGGCGGCGgc	-	MODERATE	PLPP6	protein_coding	EXON=1/1		ENSCAFT00000003285.3:c.130_150dup	ENSCAFP00000003052.3:p.Gly44_Gly50dup	1	VGNC		ENSCAFP00000003052	53
P3	Indel.Somatic	1:103098749-103098750	-	ENSCAFG00000002703	ENSCAFT00000004266.3	ENSCAFT00000004266	Transcript	frameshift_variant	544	211	71	Q/X	Cag/ag	-	HIGH		protein_coding	EXON=4/4		ENSCAFT00000004266.3:c.211del	ENSCAFP00000003949.2:p.Gln71ArgfsTer11	-1			ENSCAFP00000003949
P3	Indel.Somatic	1:103098775-103098776	-	ENSCAFG00000002703	ENSCAFT00000004266.3	ENSCAFT00000004266	Transcript	frameshift_variant	518	185	62	N/X	aAc/ac	-	HIGH		protein_coding	EXON=4/4		ENSCAFT00000004266.3:c.185del	ENSCAFP00000003949.2:p.Asn62ThrfsTer20	-1			ENSCAFP00000003949
P3	Indel.Somatic	1:105025265-105025265	TT	ENSCAFG00000044273	ENSCAFT00000090658.1	ENSCAFT00000090658	Transcript	frameshift_variant	1044-1045	621-622	207-208	-/X	-/AA	-	HIGH		protein_coding	EXON=1/2		ENSCAFT00000090658.1:c.621_622insAA	ENSCAFP00000045317.1:p.Leu208AsnfsTer61	-1			ENSCAFP00000045317
P3	Indel.LOH	1:113816754-113816758	-	ENSCAFG00000005530	ENSCAFT00000008910.3	ENSCAFT00000008910	Transcript	frameshift_variant,splice_region_variant	556-559	523-526	175-176	FS/X	TTTTcc/cc	-	HIGH	ZFP36	protein_coding	EXON=3/3		ENSCAFT00000008910.3:c.523_526del	ENSCAFP00000008265.3:p.Phe175ProfsTer125	-1	VGNC		ENSCAFP00000008265
P3	Indel.LOH	1:117001368-117001368	C	ENSCAFG00000006938	ENSCAFT00000011141.4	ENSCAFT00000011141	Transcript	frameshift_variant	140-141	140-141	47	G/GX	gga/ggGa	-	HIGH	HAUS5	protein_coding	EXON=1/19		ENSCAFT00000011141.4:c.140dup	ENSCAFP00000010319.4:p.Arg48ThrfsTer39	-1	VGNC		ENSCAFP00000010319
P3	Indel.LOH	1:117001368-117001368	C	ENSCAFG00000006938	ENSCAFT00000059823.1	ENSCAFT00000059823	Transcript	frameshift_variant	140-141	140-141	47	G/GX	gga/ggGa	-	HIGH	HAUS5	protein_coding	EXON=1/18		ENSCAFT00000059823.1:c.140dup	ENSCAFP00000045827.1:p.Arg48ThrfsTer39	-1	VGNC		ENSCAFP00000045827
P3	Indel.LOH	1:117055645-117055663	-	ENSCAFG00000031076	ENSCAFT00000049649.2	ENSCAFT00000049649	Transcript	inframe_deletion	144-161	144-161	48-54	APPVAEA/A	gcTCCACCTGTGGCAGAGGCc/gcc	-	MODERATE		protein_coding	EXON=1/2		ENSCAFT00000049649.2:c.144_161del	ENSCAFP00000040946.1:p.Val51_Pro56del	-1			ENSCAFP00000040946
P3	Indel.Somatic	1:64665087-64665105	-	ENSCAFG00000001047	ENSCAFT00000069195.1	ENSCAFT00000069195	Transcript	inframe_deletion	518-535	518-535	173-179	CRRASIR/C	tGCCGCCGAGCCTCCATTCgc/tgc	-	MODERATE	NCOA7	protein_coding	EXON=1/15		ENSCAFT00000069195.1:c.532_549del	ENSCAFP00000056533.1:p.Ile178_Ser183del	1	VGNC		ENSCAFP00000056533	14
P3	Indel.LOH	1:81543455-81543455	G	ENSCAFG00000001637	ENSCAFT00000002574.5	ENSCAFT00000002574	Transcript	frameshift_variant	767-768	767-768	256	S/SX	tcg/tcCg	-	HIGH	FOXB2	protein_coding	EXON=2/2		ENSCAFT00000002574.5:c.767dup	ENSCAFP00000002391.5:p.Arg257AlafsTer7	-1	VGNC		ENSCAFP00000002391
P3	Indel.LOH	1:88111433-88111433	A	ENSCAFG00000046950	ENSCAFT00000071683.1	ENSCAFT00000071683	Transcript	frameshift_variant	255-256	255-256	85-86	-/X	-/A	-	HIGH		protein_coding	EXON=1/1		ENSCAFT00000071683.1:c.259dup	ENSCAFP00000065990.1:p.Arg87LysfsTer7	1			ENSCAFP00000065990	4
P3	Indel.LOH	10:1580563-1580564	-	ENSCAFG00000000225	ENSCAFT00000000358.4	ENSCAFT00000000358	Transcript	frameshift_variant	501	483	161	P/X	ccC/cc	rs850621414	HIGH		protein_coding	EXON=3/7		ENSCAFT00000000358.4:c.483del	ENSCAFP00000000325.4:p.Asn162IlefsTer55	-1			ENSCAFP00000000325
P3	Indel.LOH	10:25892824-25892825	-	ENSCAFG00000001360	ENSCAFT00000092804.1	ENSCAFT00000092804	Transcript	frameshift_variant	599	571	191	R/X	Agg/gg	rs851034312	HIGH	CBX7	protein_coding	EXON=4/4		ENSCAFT00000092804.1:c.571del	ENSCAFP00000049208.1:p.Arg191GlyfsTer94	1	VGNC		ENSCAFP00000049208
P3	Indel.LOH	10:25892824-25892825	-	ENSCAFG00000001360	ENSCAFT00000062353.1	ENSCAFT00000062353	Transcript	frameshift_variant	665	637	213	R/X	Agg/gg	rs851034312	HIGH	CBX7	protein_coding	EXON=5/5		ENSCAFT00000062353.1:c.637del	ENSCAFP00000050929.1:p.Arg213GlyfsTer94	1	VGNC		ENSCAFP00000050929
P3	Indel.Somatic	10:28724081-28724135	-	ENSCAFG00000049024	ENSCAFT00000086614.1	ENSCAFT00000086614	Transcript	inframe_deletion	42-95	42-95	14-32	REGPLKAELQEGPPQAELQ/R	cgGGAGGGCCCGCTCAAGGCCGAGCTCCAGGAGGGCCCGCCACAGGCCGAGCTCCAg/cgg	-	MODERATE		protein_coding	EXON=1/2		ENSCAFT00000086614.1:c.51_104del	ENSCAFP00000064268.1:p.Leu18_Pro35del	1			ENSCAFP00000064268	9
P3	Indel.LOH	10:34765444-34765446	-	ENSCAFG00000043264	ENSCAFT00000077521.1	ENSCAFT00000077521	Transcript	frameshift_variant	264-265	114-115	38-39	TI/TX	acTAtt/actt	-	HIGH		protein_coding	EXON=1/1		ENSCAFT00000077521.1:c.115_116del	ENSCAFP00000051414.1:p.Ile39TyrfsTer23	1			ENSCAFP00000051414	1
P3	Indel.LOH	10:69327921-69327922	-	ENSCAFG00000045296	ENSCAFT00000083370.1	ENSCAFT00000083370	Transcript	frameshift_variant	113	113	38	P/X	cCa/ca	-	HIGH		protein_coding	EXON=1/2		ENSCAFT00000083370.1:c.113del	ENSCAFP00000048682.1:p.Pro38HisfsTer10	-1			ENSCAFP00000048682
P3	Indel.Somatic	11:40000277-40000280	-	ENSCAFG00000001635	ENSCAFT00000002592.4	ENSCAFT00000002592	Transcript	inframe_deletion	502-504	502-504	168	C/-	TGC/-	-	MODERATE	MLLT3	protein_coding	EXON=5/11		ENSCAFT00000002592.4:c.502_504del	ENSCAFP00000002407.4:p.Cys168del	-1	VGNC		ENSCAFP00000002407
P3	Indel.Somatic	11:40000277-40000280	-	ENSCAFG00000001635	ENSCAFT00000064193.1	ENSCAFT00000064193	Transcript	inframe_deletion	1391-1393	631-633	211	C/-	TGC/-	-	MODERATE	MLLT3	protein_coding	EXON=4/10		ENSCAFT00000064193.1:c.631_633del	ENSCAFP00000047453.1:p.Cys211del	-1	VGNC		ENSCAFP00000047453
P3	Indel.Somatic	11:40000277-40000280	-	ENSCAFG00000001635	ENSCAFT00000073267.1	ENSCAFT00000073267	Transcript	inframe_deletion	511-513	511-513	171	C/-	TGC/-	-	MODERATE	MLLT3	protein_coding	EXON=5/11		ENSCAFT00000073267.1:c.511_513del	ENSCAFP00000050743.1:p.Cys171del	-1	VGNC		ENSCAFP00000050743
P3	Indel.Somatic	11:40000277-40000280	-	ENSCAFG00000001635	ENSCAFT00000078937.1	ENSCAFT00000078937	Transcript	inframe_deletion	1391-1393	631-633	211	C/-	TGC/-	-	MODERATE	MLLT3	protein_coding	EXON=4/10		ENSCAFT00000078937.1:c.631_633del	ENSCAFP00000066111.1:p.Cys211del	-1	VGNC		ENSCAFP00000066111
P3	Indel.LOH	12:65980797-65980808	-	ENSCAFG00000003793	ENSCAFT00000092365.1	ENSCAFT00000092365	Transcript	frameshift_variant	452-462	452-462	151-154	PPRR/X	cCGCCCCGCCGG/c	-	HIGH	SESN1	protein_coding	EXON=1/10		ENSCAFT00000092365.1:c.452_462del	ENSCAFP00000053155.1:p.Pro151ArgfsTer51	-1	VGNC		ENSCAFP00000053155
P3	Indel.Somatic	12:65980826-65980830	-	ENSCAFG00000003793	ENSCAFT00000092365.1	ENSCAFT00000092365	Transcript	frameshift_variant	430-433	430-433	144-145	TA/X	ACCGcc/cc	-	HIGH	SESN1	protein_coding	EXON=1/10		ENSCAFT00000092365.1:c.430_433del	ENSCAFP00000053155.1:p.Thr144ProfsTer66	-1	VGNC		ENSCAFP00000053155
P3	Indel.Somatic	13:3682042-3682049	-	ENSCAFG00000025578	ENSCAFT00000039827.3	ENSCAFT00000039827	Transcript	splice_donor_variant,coding_sequence_variant,intron_variant	181-?	181-?	61-?	-	-	-	HIGH		protein_coding	EXON=2/3	INTRON=2/2	ENSCAFT00000039827.3:c.181_181+6del		-1			ENSCAFP00000035734
P3	Indel.LOH	13:3682047-3682049	-	ENSCAFG00000025578	ENSCAFT00000039827.3	ENSCAFT00000039827	Transcript	splice_donor_variant,coding_sequence_variant	181-?	181-?	61-?	-	-	rs852471919	HIGH		protein_coding	EXON=2/3	INTRON=2/2	ENSCAFT00000039827.3:c.181_181+1del		-1			ENSCAFP00000035734
P3	Indel.Somatic	15:16996535-16996559	-	ENSCAFG00000005339	ENSCAFT00000008596.4	ENSCAFT00000008596	Transcript	inframe_deletion	502-525	414-437	138-146	RDAVARRPR/R	cgAGACGCCGTTGCCCGGAGACCGCGt/cgt	-	MODERATE		protein_coding	EXON=2/5		ENSCAFT00000008596.4:c.414_437del	ENSCAFP00000007966.4:p.Pro145_Arg152del	-1			ENSCAFP00000007966
P3	Indel.Somatic	15:463817-463817	CG	ENSCAFG00000002500	ENSCAFT00000003950.4	ENSCAFT00000003950	Transcript	frameshift_variant	581-582	581-582	194	A/AX	gcc/gcCGc	-	HIGH	SLC2A1	protein_coding	EXON=1/10		ENSCAFT00000003950.4:c.585_586dup	ENSCAFP00000003651.4:p.Gln196ArgfsTer129	1	VGNC		ENSCAFP00000003651	5
P3	Indel.Somatic	16:15163091-15163091	CGG	ENSCAFG00000004773	ENSCAFT00000063040.1	ENSCAFT00000063040	Transcript	inframe_insertion	347-348	347-348	116	P/PG	ccc/ccCGGc	-	MODERATE	AGAP3	protein_coding	EXON=1/18		ENSCAFT00000063040.1:c.349_350insGCG	ENSCAFP00000058004.1:p.Pro116_Ala117insGly	1	VGNC		ENSCAFP00000058004	2
P3	Indel.Somatic	16:15163091-15163091	CGG	ENSCAFG00000004773	ENSCAFT00000089754.1	ENSCAFT00000089754	Transcript	inframe_insertion	347-348	347-348	116	P/PG	ccc/ccCGGc	-	MODERATE	AGAP3	protein_coding	EXON=1/12		ENSCAFT00000089754.1:c.349_350insGCG	ENSCAFP00000064655.1:p.Pro116_Ala117insGly	1	VGNC		ENSCAFP00000064655	2
P3	Indel.Somatic	16:15163091-15163091	CGG	ENSCAFG00000004773	ENSCAFT00000081370.1	ENSCAFT00000081370	Transcript	inframe_insertion	347-348	347-348	116	P/PG	ccc/ccCGGc	-	MODERATE	AGAP3	protein_coding	EXON=1/9		ENSCAFT00000081370.1:c.349_350insGCG	ENSCAFP00000066374.1:p.Pro116_Ala117insGly	1	VGNC		ENSCAFP00000066374	2
P3	Indel.LOH	17:37729596-37729602	-	ENSCAFG00000007370	ENSCAFT00000011774.3	ENSCAFT00000011774	Transcript	inframe_deletion	228-233	228-233	76-78	FSS/F	ttCAGCAGc/ttc	-	MODERATE		protein_coding	EXON=1/3		ENSCAFT00000011774.3:c.231_236del	ENSCAFP00000010913.3:p.Ser78_Ser79del	1			ENSCAFP00000010913	3
P3	Indel.LOH	17:37729596-37729602	-	ENSCAFG00000007370	ENSCAFT00000011797.4	ENSCAFT00000011797	Transcript	inframe_deletion	228-233	228-233	76-78	FSS/F	ttCAGCAGc/ttc	-	MODERATE		protein_coding	EXON=1/3		ENSCAFT00000011797.4:c.231_236del	ENSCAFP00000010936.4:p.Ser78_Ser79del	1			ENSCAFP00000010936	3
P3	Indel.LOH	17:37729596-37729602	-	ENSCAFG00000007370	ENSCAFT00000076055.1	ENSCAFT00000076055	Transcript	inframe_deletion	171-176	171-176	57-59	FSS/F	ttCAGCAGc/ttc	-	MODERATE		protein_coding	EXON=2/4		ENSCAFT00000076055.1:c.174_179del	ENSCAFP00000057356.1:p.Ser59_Ser60del	1			ENSCAFP00000057356	3
P3	Indel.LOH	17:37729607-37729607	A	ENSCAFG00000007370	ENSCAFT00000011774.3	ENSCAFT00000011774	Transcript	frameshift_variant	238-239	238-239	80	G/EX	gga/gAga	rs852027546	HIGH		protein_coding	EXON=1/3		ENSCAFT00000011774.3:c.238_239insA	ENSCAFP00000010913.3:p.Gly80GlufsTer16	1			ENSCAFP00000010913
P3	Indel.LOH	17:37729607-37729607	A	ENSCAFG00000007370	ENSCAFT00000011797.4	ENSCAFT00000011797	Transcript	frameshift_variant	238-239	238-239	80	G/EX	gga/gAga	rs852027546	HIGH		protein_coding	EXON=1/3		ENSCAFT00000011797.4:c.238_239insA	ENSCAFP00000010936.4:p.Gly80GlufsTer16	1			ENSCAFP00000010936
P3	Indel.LOH	17:37729607-37729607	A	ENSCAFG00000007370	ENSCAFT00000076055.1	ENSCAFT00000076055	Transcript	frameshift_variant	181-182	181-182	61	G/EX	gga/gAga	rs852027546	HIGH		protein_coding	EXON=2/4		ENSCAFT00000076055.1:c.181_182insA	ENSCAFP00000057356.1:p.Gly61GlufsTer16	1			ENSCAFP00000057356
P3	Indel.LOH	17:40080828-40080828	G	ENSCAFG00000007876	ENSCAFT00000012576.4	ENSCAFT00000012576	Transcript	frameshift_variant	49-50	49-50	17	Q/RX	cag/cGag	-	HIGH	TRABD2A	protein_coding	EXON=1/6		ENSCAFT00000012576.4:c.49_50insG	ENSCAFP00000011644.4:p.Gln17ArgfsTer22	1	VGNC		ENSCAFP00000011644
P3	Indel.LOH	17:40080828-40080828	G	ENSCAFG00000007876	ENSCAFT00000049228.3	ENSCAFT00000049228	Transcript	frameshift_variant	49-50	49-50	17	Q/RX	cag/cGag	-	HIGH	TRABD2A	protein_coding	EXON=1/7		ENSCAFT00000049228.3:c.49_50insG	ENSCAFP00000038255.1:p.Gln17ArgfsTer22	1	VGNC		ENSCAFP00000038255
P3	Indel.Somatic	17:47770301-47770301	GCGCCCC	ENSCAFG00000032377	ENSCAFT00000086405.1	ENSCAFT00000086405	Transcript	frameshift_variant	427-428	427-428	143	S/SAPX	agc/aGCGCCCCgc	-	HIGH	EVA1A	protein_coding	EXON=1/2		ENSCAFT00000086405.1:c.448_454dup	ENSCAFP00000051525.1:p.Arg152ProfsTer?	1	VGNC		ENSCAFP00000051525	27
P3	Indel.Somatic	17:47770301-47770301	GCGCCCC	ENSCAFG00000032377	ENSCAFT00000076993.1	ENSCAFT00000076993	Transcript	frameshift_variant	427-428	427-428	143	S/SAPX	agc/aGCGCCCCgc	-	HIGH	EVA1A	protein_coding	EXON=1/3		ENSCAFT00000076993.1:c.448_454dup	ENSCAFP00000063893.1:p.Arg152ProfsTer67	1	VGNC		ENSCAFP00000063893	27
P3	Indel.Somatic	17:5368956-5368956	G	ENSCAFG00000047461	ENSCAFT00000086984.1	ENSCAFT00000086984	Transcript	splice_acceptor_variant,non_coding_transcript_variant	-	-	-	-	-	rs851697657	HIGH		lncRNA		INTRON=1/1	ENSCAFT00000086984.1:n.189-2_189-1insG		1
P3	Indel.Somatic	18:25777583-25777584	-	ENSCAFG00000006633	ENSCAFT00000010687.5	ENSCAFT00000010687	Transcript	frameshift_variant	139	139	47	C/X	Tgc/gc	-	HIGH		protein_coding	EXON=1/8		ENSCAFT00000010687.5:c.139del	ENSCAFP00000009908.4:p.Cys47AlafsTer175	-1			ENSCAFP00000009908
P3	Indel.Somatic	18:46522891-46522891	CCCC	ENSCAFG00000010231	ENSCAFT00000016239.4	ENSCAFT00000016239	Transcript	frameshift_variant	30-31	30-31	44115	-/PX	-/CCCC	-	HIGH	KCNQ1	protein_coding	EXON=1/16		ENSCAFT00000016239.4:c.39_42dup	ENSCAFP00000015023.4:p.Ser15ProfsTer19	1	VGNC		ENSCAFP00000015023	12
P3	Indel.LOH	18:51352632-51352632	AA	ENSCAFG00000028476	ENSCAFT00000049705.2	ENSCAFT00000049705	Transcript	frameshift_variant	345-346	110-111	37	A/AX	gcg/gcTTg	rs850775483	HIGH	DRAP1	protein_coding	EXON=1/6		ENSCAFT00000049705.2:c.110_111insTT	ENSCAFP00000041746.2:p.Gly38TrpfsTer94	-1	HGNC	DRAP1	ENSCAFP00000041746
P3	Indel.LOH	19:18933245-18933245	TG	ENSCAFG00000004160	ENSCAFT00000081806.1	ENSCAFT00000081806	Transcript	frameshift_variant	258-259	56-57	19	F/FX	ttt/ttTGt	-	HIGH	TNIP3	protein_coding	EXON=1/9		ENSCAFT00000081806.1:c.57_58insGT	ENSCAFP00000055185.1:p.Phe20ValfsTer48	1	VGNC		ENSCAFP00000055185	1
P3	Indel.Somatic	2:7107339-7107339	TTC	ENSCAFG00000031840	ENSCAFT00000044176.2	ENSCAFT00000044176	Transcript	inframe_insertion	707-708	76-77	26	F/FL	ttt/tTTCtt	-	MODERATE		protein_coding	EXON=1/12		ENSCAFT00000044176.2:c.78_79insCTT	ENSCAFP00000039008.2:p.Phe26_Phe27insLeu	1			ENSCAFP00000039008	2
P3	Indel.Somatic	2:7107339-7107339	TTC	ENSCAFG00000031840	ENSCAFT00000073743.1	ENSCAFT00000073743	Transcript	inframe_insertion	707-708	76-77	26	F/FL	ttt/tTTCtt	-	MODERATE		protein_coding	EXON=1/11		ENSCAFT00000073743.1:c.78_79insCTT	ENSCAFP00000055549.1:p.Phe26_Phe27insLeu	1			ENSCAFP00000055549	2
P3	Indel.LOH	2:77366534-77366535	-	ENSCAFG00000014773	ENSCAFT00000023453.5	ENSCAFT00000023453	Transcript	frameshift_variant	10765	10765	3589	S/X	Tct/ct	-	HIGH	HSPG2	protein_coding	EXON=81/83		ENSCAFT00000023453.5:c.10765del	ENSCAFP00000021781.5:p.Ser3589LeufsTer3	1	VGNC		ENSCAFP00000021781
P3	Indel.LOH	2:77366534-77366535	-	ENSCAFG00000014773	ENSCAFT00000045470.3	ENSCAFT00000045470	Transcript	frameshift_variant	12676	12676	4226	S/X	Tct/ct	-	HIGH	HSPG2	protein_coding	EXON=93/95		ENSCAFT00000045470.3:c.12676del	ENSCAFP00000036114.2:p.Ser4226LeufsTer15	1	VGNC		ENSCAFP00000036114
P3	Indel.LOH	2:77366534-77366535	-	ENSCAFG00000014773	ENSCAFT00000044491.3	ENSCAFT00000044491	Transcript	frameshift_variant	12592	12592	4198	S/X	Tct/ct	-	HIGH	HSPG2	protein_coding	EXON=90/92		ENSCAFT00000044491.3:c.12592del	ENSCAFP00000040797.2:p.Ser4198LeufsTer15	1	VGNC		ENSCAFP00000040797
P3	Indel.LOH	2:77366534-77366535	-	ENSCAFG00000014773	ENSCAFT00000084320.1	ENSCAFT00000084320	Transcript	frameshift_variant	12376	12376	4126	S/X	Tct/ct	-	HIGH	HSPG2	protein_coding	EXON=89/91		ENSCAFT00000084320.1:c.12376del	ENSCAFP00000050027.1:p.Ser4126LeufsTer15	1	VGNC		ENSCAFP00000050027
P3	Indel.LOH	2:77366534-77366535	-	ENSCAFG00000014773	ENSCAFT00000085166.1	ENSCAFT00000085166	Transcript	frameshift_variant	12508	12508	4170	S/X	Tct/ct	-	HIGH	HSPG2	protein_coding	EXON=91/93		ENSCAFT00000085166.1:c.12508del	ENSCAFP00000055126.1:p.Ser4170LeufsTer3	1	VGNC		ENSCAFP00000055126
P3	Indel.LOH	2:77366534-77366535	-	ENSCAFG00000014773	ENSCAFT00000086372.1	ENSCAFT00000086372	Transcript	frameshift_variant	12781	12781	4261	S/X	Tct/ct	-	HIGH	HSPG2	protein_coding	EXON=92/94		ENSCAFT00000086372.1:c.12781del	ENSCAFP00000057109.1:p.Ser4261LeufsTer3	1	VGNC		ENSCAFP00000057109
P3	Indel.LOH	20:48517884-48517886	-	ENSCAFG00000016511	ENSCAFT00000026160.5	ENSCAFT00000026160	Transcript	frameshift_variant	3200-3201	2702-2703	901	E/X	gAA/g	-	HIGH	RFX1	protein_coding	EXON=19/19		ENSCAFT00000026160.5:c.2702_2703del	ENSCAFP00000024289.5:p.Glu901GlyfsTer6	1	VGNC		ENSCAFP00000024289
P3	Indel.LOH	20:48517884-48517886	-	ENSCAFG00000016511	ENSCAFT00000029732.5	ENSCAFT00000029732	Transcript	frameshift_variant	3209-3210	2711-2712	904	E/X	gAA/g	-	HIGH	RFX1	protein_coding	EXON=19/19		ENSCAFT00000029732.5:c.2711_2712del	ENSCAFP00000027632.4:p.Glu904GlyfsTer6	1	VGNC		ENSCAFP00000027632
P3	Indel.LOH	20:5585939-5585939	T	ENSCAFG00000004613	ENSCAFT00000007454.5	ENSCAFT00000007454	Transcript	frameshift_variant,splice_region_variant	2576-2577	2443-2444	815	G/VX	ggg/gTgg	rs852296177	HIGH	PLXND1	protein_coding	EXON=10/36		ENSCAFT00000007454.5:c.2443_2444insT	ENSCAFP00000006907.4:p.Gly815ValfsTer29	1	VGNC		ENSCAFP00000006907
P3	Indel.Somatic	20:57897957-57897959	-	ENSCAFG00000019704	ENSCAFT00000075857.1	ENSCAFT00000075857	Transcript	frameshift_variant	2038-2039	2038-2039	680	G/X	GGg/g	-	HIGH		protein_coding	EXON=7/7		ENSCAFT00000075857.1:c.2051_2052del	ENSCAFP00000066416.1:p.Gly684AlafsTer25	1			ENSCAFP00000066416	13
P3	Indel.LOH	23:39471643-39471646	-	ENSCAFG00000029025	ENSCAFT00000044424.2	ENSCAFT00000044424	Transcript	inframe_deletion	808-810	808-810	270	P/-	CCG/-	-	MODERATE		protein_coding	EXON=1/4		ENSCAFT00000044424.2:c.830_832del	ENSCAFP00000038483.2:p.Pro277del	1			ENSCAFP00000038483	22
P3	Indel.Somatic	23:49281776-49281776	CGGGGGCGGGGCCTCCGGGGGCGGGGTCTC	ENSCAFG00000008746	ENSCAFT00000079457.1	ENSCAFT00000079457	Transcript	inframe_insertion	4936-4937	4936-4937	1646	A/GDPAPGGPAPA	gcc/gGAGACCCCGCCCCCGGAGGCCCCGCCCCCGcc	-	MODERATE	PLCH1	protein_coding	EXON=23/23		ENSCAFT00000079457.1:c.4936_4937insGAGACCCCGCCCCCGGAGGCCCCGCCCCCG	ENSCAFP00000054257.1:p.Pro1645_Ala1646insGlyAspProAlaProGlyGlyProAlaPro	-1	VGNC		ENSCAFP00000054257
P3	Indel.Somatic	23:49281776-49281776	CGGGGGCGGGGCCTCCGGGGGCGGGGTCTC	ENSCAFG00000008746	ENSCAFT00000013905.5	ENSCAFT00000013905	Transcript	inframe_insertion	4951-4952	4915-4916	1639	A/GDPAPGGPAPA	gcc/gGAGACCCCGCCCCCGGAGGCCCCGCCCCCGcc	-	MODERATE	PLCH1	protein_coding	EXON=22/22		ENSCAFT00000013905.5:c.4915_4916insGAGACCCCGCCCCCGGAGGCCCCGCCCCCG	ENSCAFP00000012866.3:p.Pro1638_Ala1639insGlyAspProAlaProGlyGlyProAlaPro	-1	VGNC		ENSCAFP00000012866
P3	Indel.Somatic	23:49281776-49281776	CGGGGGCGGGGCCTCCGGGGGCGGGGTCTC	ENSCAFG00000008746	ENSCAFT00000079844.1	ENSCAFT00000079844	Transcript	inframe_insertion	4879-4880	4843-4844	1615	A/GDPAPGGPAPA	gcc/gGAGACCCCGCCCCCGGAGGCCCCGCCCCCGcc	-	MODERATE	PLCH1	protein_coding	EXON=21/21		ENSCAFT00000079844.1:c.4843_4844insGAGACCCCGCCCCCGGAGGCCCCGCCCCCG	ENSCAFP00000055115.1:p.Pro1614_Ala1615insGlyAspProAlaProGlyGlyProAlaPro	-1	VGNC		ENSCAFP00000055115
P3	Indel.Somatic	23:49281776-49281776	CGGGGGCGGGGCCTCCGGGGGCGGGGTCTC	ENSCAFG00000008746	ENSCAFT00000082893.1	ENSCAFT00000082893	Transcript	inframe_insertion	5011-5012	4975-4976	1659	A/GDPAPGGPAPA	gcc/gGAGACCCCGCCCCCGGAGGCCCCGCCCCCGcc	-	MODERATE	PLCH1	protein_coding	EXON=23/23		ENSCAFT00000082893.1:c.4975_4976insGAGACCCCGCCCCCGGAGGCCCCGCCCCCG	ENSCAFP00000059159.1:p.Pro1658_Ala1659insGlyAspProAlaProGlyGlyProAlaPro	-1	VGNC		ENSCAFP00000059159
P3	Indel.Somatic	23:49281776-49281776	CGGGGGCGGGGCCTCCGGGGGCGGGGTCTC	ENSCAFG00000008746	ENSCAFT00000085170.1	ENSCAFT00000085170	Transcript	inframe_insertion	4744-4745	4708-4709	1570	A/GDPAPGGPAPA	gcc/gGAGACCCCGCCCCCGGAGGCCCCGCCCCCGcc	-	MODERATE	PLCH1	protein_coding	EXON=21/21		ENSCAFT00000085170.1:c.4708_4709insGAGACCCCGCCCCCGGAGGCCCCGCCCCCG	ENSCAFP00000061571.1:p.Pro1569_Ala1570insGlyAspProAlaProGlyGlyProAlaPro	-1	VGNC		ENSCAFP00000061571
P3	Indel.Somatic	23:50653387-50653404	-	ENSCAFG00000008884	ENSCAFT00000014104.4	ENSCAFT00000014104	Transcript	frameshift_variant	547-563	547-563	183-188	SRPRRA/X	TCGAGGCCCCGCAGAGCc/c	-	HIGH	CCNL1	protein_coding	EXON=1/12		ENSCAFT00000014104.4:c.547_563del	ENSCAFP00000013048.4:p.Ser183ProfsTer60	-1	HGNC	CCNL1	ENSCAFP00000013048
P3	Indel.LOH	23:8023200-8023201	-	ENSCAFG00000004972	ENSCAFT00000071919.1	ENSCAFT00000071919	Transcript	frameshift_variant	1489	1489	497	F/X	Ttt/tt	-	HIGH	OXSR1	protein_coding	EXON=16/16		ENSCAFT00000071919.1:c.1505del	ENSCAFP00000049850.1:p.Leu502Ter	1	VGNC		ENSCAFP00000049850	16
P3	Indel.LOH	23:8023200-8023201	-	ENSCAFG00000004972	ENSCAFT00000063476.1	ENSCAFT00000063476	Transcript	frameshift_variant	1456	1456	486	F/X	Ttt/tt	-	HIGH	OXSR1	protein_coding	EXON=16/16		ENSCAFT00000063476.1:c.1472del	ENSCAFP00000062671.1:p.Leu491Ter	1	VGNC		ENSCAFP00000062671	16
P3	Indel.LOH	24:15803269-15803269	CGGCCT	ENSCAFG00000024978	ENSCAFT00000038653.2	ENSCAFT00000038653	Transcript	inframe_insertion	145-146	136-137	46	T/TAS	acg/aCGGCCTcg	-	MODERATE	LRRN4	protein_coding	EXON=1/4		ENSCAFT00000038653.2:c.143_148dup	ENSCAFP00000034397.2:p.Ser48_Ala49dup	1	VGNC		ENSCAFP00000034397	12
P3	Indel.Somatic	24:18184558-18184570	-	ENSCAFG00000006432	ENSCAFT00000083496.1	ENSCAFT00000083496	Transcript	inframe_deletion	428-439	393-404	131-135	-	ggCGNNNNNNNNNNc/ggc	-	MODERATE	AVP	protein_coding	EXON=2/2		ENSCAFT00000083496.1:c.395_406del		1	VGNC		ENSCAFP00000061071
P3	Indel.Somatic	24:19458081-19458083	-	ENSCAFG00000025335	ENSCAFT00000039302.3	ENSCAFT00000039302	Transcript	frameshift_variant	555-556	471-472	157-158	TV/TX	acTGta/acta	rs852293039	HIGH		protein_coding	EXON=3/4		ENSCAFT00000039302.3:c.472_473del	ENSCAFP00000035133.2:p.Val158IlefsTer65	1			ENSCAFP00000035133	1
P3	Indel.Somatic	24:31239979-31239991	-	ENSCAFG00000009291	ENSCAFT00000014765.4	ENSCAFT00000014765	Transcript	inframe_deletion	478-489	478-489	160-163	AAPG/-	GCGGCGCCTGGA/-	-	MODERATE	L3MBTL1	protein_coding	EXON=3/21		ENSCAFT00000014765.4:c.482_493del	ENSCAFP00000013658.4:p.Ala161_Ala164del	1	VGNC		ENSCAFP00000013658	4
P3	Indel.Somatic	24:31239979-31239991	-	ENSCAFG00000009291	ENSCAFT00000049153.3	ENSCAFT00000049153	Transcript	inframe_deletion	1392-1403	442-453	148-151	AAPG/-	GCGGCGCCTGGA/-	-	MODERATE	L3MBTL1	protein_coding	EXON=8/27		ENSCAFT00000049153.3:c.446_457del	ENSCAFP00000037053.2:p.Ala149_Ala152del	1	VGNC		ENSCAFP00000037053	4
P3	Indel.Somatic	24:31239979-31239991	-	ENSCAFG00000009291	ENSCAFT00000068961.1	ENSCAFT00000068961	Transcript	inframe_deletion	1392-1403	442-453	148-151	AAPG/-	GCGGCGCCTGGA/-	-	MODERATE	L3MBTL1	protein_coding	EXON=8/25		ENSCAFT00000068961.1:c.446_457del	ENSCAFP00000055889.1:p.Ala149_Ala152del	1	VGNC		ENSCAFP00000055889	4
P3	Indel.Somatic	24:31239979-31239991	-	ENSCAFG00000009291	ENSCAFT00000093866.1	ENSCAFT00000093866	Transcript	inframe_deletion	1392-1403	442-453	148-151	AAPG/-	GCGGCGCCTGGA/-	-	MODERATE	L3MBTL1	protein_coding	EXON=8/24		ENSCAFT00000093866.1:c.446_457del	ENSCAFP00000065584.1:p.Ala149_Ala152del	1	VGNC		ENSCAFP00000065584	4
P3	Indel.Somatic	24:47518838-47518854	-	ENSCAFG00000030747	ENSCAFT00000045475.2	ENSCAFT00000045475	Transcript	frameshift_variant	394-409	394-409	132-137	SQHPGT/X	TCCCAGCACCCCGGCAcc/cc	-	HIGH	RGS19	protein_coding	EXON=1/5		ENSCAFT00000045475.2:c.394_409del	ENSCAFP00000038171.2:p.Ser132ProfsTer267	-1	VGNC		ENSCAFP00000038171
P3	Indel.Somatic	25:17911654-17911660	-	ENSCAFG00000007316	ENSCAFT00000011709.4	ENSCAFT00000011709	Transcript	inframe_deletion	394-399	38-43	13-15	KGE/K	aAAGGAGaa/aaa	-	MODERATE	GJB6	protein_coding	EXON=1/3		ENSCAFT00000011709.4:c.44_49del	ENSCAFP00000010850.4:p.Glu15_Gly16del	1	VGNC		ENSCAFP00000010850	6
P3	Indel.LOH	25:17912009-17912009	G	ENSCAFG00000007316	ENSCAFT00000011709.4	ENSCAFT00000011709	Transcript	frameshift_variant	748-749	392-393	131	A/AX	gcc/gcGc	-	HIGH	GJB6	protein_coding	EXON=1/3		ENSCAFT00000011709.4:c.392_393insG	ENSCAFP00000010850.4:p.Arg134AlafsTer28	1	VGNC		ENSCAFP00000010850
P3	Indel.Somatic	25:19872555-19872564	-	ENSCAFG00000025297	ENSCAFT00000012076.4	ENSCAFT00000012076	Transcript	inframe_deletion	2213-2221	1942-1950	648-650	PAA/-	CCTGCTGCT/-	rs852801980	MODERATE		protein_coding	EXON=14/15		ENSCAFT00000012076.4:c.1942_1950del	ENSCAFP00000011193.4:p.Pro648_Ala650del	-1			ENSCAFP00000011193
P3	Indel.LOH	25:49318269-49318270	-	ENSCAFG00000012546	ENSCAFT00000019989.4	ENSCAFT00000019989	Transcript	splice_acceptor_variant	-	-	-	-	-	-	HIGH	HDAC4	protein_coding		INTRON=23/24	ENSCAFT00000019989.4:c.3082-2del		-1	VGNC		ENSCAFP00000018541
P3	Indel.LOH	26:27431695-27431696	-	ENSCAFG00000031273	ENSCAFT00000075253.1	ENSCAFT00000075253	Transcript	frameshift_variant	997	640	214	R/X	Cgc/gc	rs851962280	HIGH		protein_coding	EXON=2/2		ENSCAFT00000075253.1:c.640del	ENSCAFP00000044007.1:p.Arg214AlafsTer2	1			ENSCAFP00000044007
P3	Indel.LOH	26:27431695-27431696	-	ENSCAFG00000031273	ENSCAFT00000074726.1	ENSCAFT00000074726	Transcript	frameshift_variant	669	640	214	R/X	Cgc/gc	rs851962280	HIGH		protein_coding	EXON=2/2		ENSCAFT00000074726.1:c.640del	ENSCAFP00000045554.1:p.Arg214AlafsTer2	1			ENSCAFP00000045554
P3	Indel.LOH	26:27431695-27431696	-	ENSCAFG00000031273	ENSCAFT00000069737.1	ENSCAFT00000069737	Transcript	frameshift_variant	1185	640	214	R/X	Cgc/gc	rs851962280	HIGH		protein_coding	EXON=2/2		ENSCAFT00000069737.1:c.640del	ENSCAFP00000053843.1:p.Arg214AlafsTer2	1			ENSCAFP00000053843
P3	Indel.LOH	26:27431695-27431696	-	ENSCAFG00000031273	ENSCAFT00000091226.1	ENSCAFT00000091226	Transcript	frameshift_variant	674	640	214	R/X	Cgc/gc	rs851962280	HIGH		protein_coding	EXON=2/2		ENSCAFT00000091226.1:c.640del	ENSCAFP00000056144.1:p.Arg214AlafsTer2	1			ENSCAFP00000056144
P3	Indel.LOH	26:27431695-27431696	-	ENSCAFG00000031273	ENSCAFT00000083730.1	ENSCAFT00000083730	Transcript	frameshift_variant	679	640	214	R/X	Cgc/gc	rs851962280	HIGH		protein_coding	EXON=2/2		ENSCAFT00000083730.1:c.640del	ENSCAFP00000061803.1:p.Arg214AlafsTer2	1			ENSCAFP00000061803
P3	Indel.Somatic	27:38367811-38367811	GGCCCAGGCCCAGGCCCA	ENSCAFG00000014740	ENSCAFT00000023420.4	ENSCAFT00000023420	Transcript	inframe_insertion	1483-1484	1418-1419	473	V/VAQAQAQ	gtg/gtGGCCCAGGCCCAGGCCCAg	-	MODERATE	ZNF384	protein_coding	EXON=10/10		ENSCAFT00000023420.4:c.1422_1439dup	ENSCAFP00000021750.3:p.Gln497_Ala502dup	1	VGNC		ENSCAFP00000021750	21
P3	Indel.Somatic	27:38367811-38367811	GGCCCAGGCCCAGGCCCA	ENSCAFG00000014740	ENSCAFT00000090145.1	ENSCAFT00000090145	Transcript	inframe_insertion	1949-1950	1418-1419	473	V/VAQAQAQ	gtg/gtGGCCCAGGCCCAGGCCCAg	-	MODERATE	ZNF384	protein_coding	EXON=11/12		ENSCAFT00000090145.1:c.1422_1439dup	ENSCAFP00000043567.1:p.Gln491_Ala496dup	1	VGNC		ENSCAFP00000043567	21
P3	Indel.Somatic	27:38367811-38367811	GGCCCAGGCCCAGGCCCA	ENSCAFG00000014740	ENSCAFT00000093325.1	ENSCAFT00000093325	Transcript	inframe_insertion	1601-1602	1070-1071	357	V/VAQAQAQ	gtg/gtGGCCCAGGCCCAGGCCCAg	-	MODERATE	ZNF384	protein_coding	EXON=9/10		ENSCAFT00000093325.1:c.1074_1091dup	ENSCAFP00000047585.1:p.Gln375_Ala380dup	1	VGNC		ENSCAFP00000047585	21
P3	Indel.Somatic	27:38367811-38367811	GGCCCAGGCCCAGGCCCA	ENSCAFG00000014740	ENSCAFT00000069282.1	ENSCAFT00000069282	Transcript	inframe_insertion	1300-1301	1235-1236	412	V/VAQAQAQ	gtg/gtGGCCCAGGCCCAGGCCCAg	-	MODERATE	ZNF384	protein_coding	EXON=9/9		ENSCAFT00000069282.1:c.1239_1256dup	ENSCAFP00000060518.1:p.Gln436_Ala441dup	1	VGNC		ENSCAFP00000060518	21
P3	Indel.LOH	27:42101564-42101564	C	ENSCAFG00000015707	ENSCAFT00000067587.1	ENSCAFT00000067587	Transcript	frameshift_variant	2971-2972	2692-2693	898	S/SX	tcc/tCcc	-	HIGH	DDX11	protein_coding	EXON=26/26		ENSCAFT00000067587.1:c.2699dup	ENSCAFP00000051841.1:p.Pro901AlafsTer26	1	HGNC	DDX11	ENSCAFP00000051841
P3	Indel.LOH	27:42101564-42101564	C	ENSCAFG00000015707	ENSCAFT00000067790.1	ENSCAFT00000067790	Transcript	frameshift_variant	2965-2966	2686-2687	896	S/SX	tcc/tCcc	-	HIGH	DDX11	protein_coding	EXON=26/26		ENSCAFT00000067790.1:c.2693dup	ENSCAFP00000058007.1:p.Pro899AlafsTer26	1	HGNC	DDX11	ENSCAFP00000058007
P3	Indel.LOH	28:1436977-1436978	-	ENSCAFG00000030265	ENSCAFT00000045867.2	ENSCAFT00000045867	Transcript	frameshift_variant	54	54	18	N/X	aaC/aa	-	HIGH		protein_coding	EXON=1/2		ENSCAFT00000045867.2:c.54del	ENSCAFP00000042223.2:p.Asn18LysfsTer8	1			ENSCAFP00000042223
P3	Indel.LOH	28:16586896-16586896	T	ENSCAFG00000024905	ENSCAFT00000074354.1	ENSCAFT00000074354	Transcript	frameshift_variant	120-121	120-121	40-41	-/X	-/T	rs850633609	HIGH	GSTO2	protein_coding	EXON=1/5		ENSCAFT00000074354.1:c.120_121insT	ENSCAFP00000058513.1:p.Gly41TrpfsTer103	1	HGNC	GSTO2	ENSCAFP00000058513
P3	Indel.LOH	28:24623398-24623398	GTGTGT	ENSCAFG00000011157	ENSCAFT00000017737.4	ENSCAFT00000017737	Transcript	protein_altering_variant,splice_region_variant	880-881	373-374	125	A/GVS	gcc/gGTGTGTcc	rs852960032	MODERATE	CASP7	protein_coding			ENSCAFT00000017737.4:c.373+9_373+14dup		1	VGNC		ENSCAFP00000016420
P3	Indel.LOH	28:24623398-24623398	GTGTGT	ENSCAFG00000011157	ENSCAFT00000062889.1	ENSCAFT00000062889	Transcript	protein_altering_variant,splice_region_variant	301-302	301-302	101	A/GVS	gcc/gGTGTGTcc	rs852960032	MODERATE	CASP7	protein_coding			ENSCAFT00000062889.1:c.301+9_301+14dup		1	VGNC		ENSCAFP00000058428
P3	Indel.LOH	28:25816770-25816770	CGGCGGCGGCGG	ENSCAFG00000011725	ENSCAFT00000018678.5	ENSCAFT00000018678	Transcript	inframe_insertion	431-432	74-75	25	V/VGGGG	gtc/gtCGGCGGCGGCGGc	-	MODERATE	ATRNL1	protein_coding	EXON=1/29		ENSCAFT00000018678.5:c.75_76insGGCGGCGGCGGC	ENSCAFP00000017303.4:p.Val25_Arg26insGlyGlyGlyGly	1	VGNC		ENSCAFP00000017303	1
P3	Indel.LOH	28:25816770-25816770	CGGCGGCGGCGG	ENSCAFG00000011725	ENSCAFT00000059657.1	ENSCAFT00000059657	Transcript	inframe_insertion	431-432	74-75	25	V/VGGGG	gtc/gtCGGCGGCGGCGGc	-	MODERATE	ATRNL1	protein_coding	EXON=1/27		ENSCAFT00000059657.1:c.75_76insGGCGGCGGCGGC	ENSCAFP00000045513.1:p.Val25_Arg26insGlyGlyGlyGly	1	VGNC		ENSCAFP00000045513	1
P3	Indel.LOH	28:25816770-25816770	CGGCGGCGGCGG	ENSCAFG00000011725	ENSCAFT00000075464.1	ENSCAFT00000075464	Transcript	inframe_insertion	431-432	74-75	25	V/VGGGG	gtc/gtCGGCGGCGGCGGc	-	MODERATE	ATRNL1	protein_coding	EXON=1/7		ENSCAFT00000075464.1:c.75_76insGGCGGCGGCGGC	ENSCAFP00000048503.1:p.Val25_Arg26insGlyGlyGlyGly	1	VGNC		ENSCAFP00000048503	1
P3	Indel.LOH	28:25816770-25816770	CGGCGGCGGCGG	ENSCAFG00000011725	ENSCAFT00000090343.1	ENSCAFT00000090343	Transcript	inframe_insertion	431-432	74-75	25	V/VGGGG	gtc/gtCGGCGGCGGCGGc	-	MODERATE	ATRNL1	protein_coding	EXON=1/28		ENSCAFT00000090343.1:c.75_76insGGCGGCGGCGGC	ENSCAFP00000049119.1:p.Val25_Arg26insGlyGlyGlyGly	1	VGNC		ENSCAFP00000049119	1
P3	Indel.LOH	28:25816770-25816770	CGGCGGCGGCGG	ENSCAFG00000011725	ENSCAFT00000085240.1	ENSCAFT00000085240	Transcript	inframe_insertion	431-432	74-75	25	V/VGGGG	gtc/gtCGGCGGCGGCGGc	-	MODERATE	ATRNL1	protein_coding	EXON=1/28		ENSCAFT00000085240.1:c.75_76insGGCGGCGGCGGC	ENSCAFP00000056723.1:p.Val25_Arg26insGlyGlyGlyGly	1	VGNC		ENSCAFP00000056723	1
P3	Indel.LOH	28:25816770-25816770	CGGCGGCGGCGG	ENSCAFG00000011725	ENSCAFT00000063164.1	ENSCAFT00000063164	Transcript	inframe_insertion	431-432	74-75	25	V/VGGGG	gtc/gtCGGCGGCGGCGGc	-	MODERATE	ATRNL1	protein_coding	EXON=1/27		ENSCAFT00000063164.1:c.75_76insGGCGGCGGCGGC	ENSCAFP00000060793.1:p.Val25_Arg26insGlyGlyGlyGly	1	VGNC		ENSCAFP00000060793	1
P3	Indel.LOH	28:31705891-31705892	-	ENSCAFG00000012412	ENSCAFT00000019700.4	ENSCAFT00000019700	Transcript	frameshift_variant	438	438	146	T/X	acA/ac	rs850985714	HIGH		protein_coding	EXON=3/3		ENSCAFT00000019700.4:c.438del	ENSCAFP00000018271.4:p.Gly147GlufsTer9	1			ENSCAFP00000018271
P3	Indel.LOH	28:34294550-34294550	T	ENSCAFG00000012775	ENSCAFT00000069624.1	ENSCAFT00000069624	Transcript	frameshift_variant,splice_region_variant	1153-1154	1153-1154	385	S/YX	tcc/tAcc	-	HIGH	CTBP2	protein_coding	EXON=3/12		ENSCAFT00000069624.1:c.1153_1154insA	ENSCAFP00000051395.1:p.Ser385TyrfsTer146	-1	VGNC		ENSCAFP00000051395
P3	Indel.LOH	28:38493111-38493113	-	ENSCAFG00000013267	ENSCAFT00000083908.1	ENSCAFT00000083908	Transcript	frameshift_variant	1795-1796	1177-1178	393	L/X	CTg/g	rs850523510	HIGH	EBF3	protein_coding	EXON=13/13		ENSCAFT00000083908.1:c.1177_1178del	ENSCAFP00000045432.1:p.Leu393ValfsTer?	-1	VGNC		ENSCAFP00000045432
P3	Indel.LOH	28:38493111-38493113	-	ENSCAFG00000013267	ENSCAFT00000073469.1	ENSCAFT00000073469	Transcript	frameshift_variant	1426-1427	1426-1427	476	L/X	CTg/g	rs850523510	HIGH	EBF3	protein_coding	EXON=3/3		ENSCAFT00000073469.1:c.1426_1427del	ENSCAFP00000064125.1:p.Leu476ValfsTer?	-1	VGNC		ENSCAFP00000064125
P3	Indel.LOH	28:38495367-38495368	-	ENSCAFG00000013267	ENSCAFT00000072495.1	ENSCAFT00000072495	Transcript	frameshift_variant	1494	876	292	G/X	ggG/gg	rs852139441	HIGH	EBF3	protein_coding	EXON=9/9		ENSCAFT00000072495.1:c.876del	ENSCAFP00000045045.1:p.Trp293GlyfsTer26	-1	VGNC		ENSCAFP00000045045
P3	Indel.LOH	28:38495367-38495368	-	ENSCAFG00000013267	ENSCAFT00000073469.1	ENSCAFT00000073469	Transcript	frameshift_variant	657	657	219	G/X	ggG/gg	rs852139441	HIGH	EBF3	protein_coding	EXON=1/3		ENSCAFT00000073469.1:c.657del	ENSCAFP00000064125.1:p.Trp220GlyfsTer26	-1	VGNC		ENSCAFP00000064125
P3	Indel.LOH	28:4535384-4535390	-	ENSCAFG00000043662	ENSCAFT00000074905.1	ENSCAFT00000074905	Transcript	inframe_deletion	404-409	404-409	135-137	AAV/V	gCCGCCGtc/gtc	-	MODERATE		protein_coding	EXON=2/4		ENSCAFT00000074905.1:c.404_409del	ENSCAFP00000060578.1:p.Ala135_Ala136del	-1			ENSCAFP00000060578
P3	Indel.LOH	28:8670314-8670318	-	ENSCAFG00000008090	ENSCAFT00000085340.1	ENSCAFT00000085340	Transcript	frameshift_variant,splice_region_variant	282-285	282-285	94-95	IK/X	atAAAG/at	-	HIGH	HELLS	protein_coding	EXON=5/5		ENSCAFT00000085340.1:c.283_286del	ENSCAFP00000044051.1:p.Lys95PhefsTer?	1	VGNC		ENSCAFP00000044051	1
P3	Indel.Somatic	30:35711713-35711717	-	ENSCAFG00000017652	ENSCAFT00000062606.1	ENSCAFT00000062606	Transcript	frameshift_variant	1338-1341	668-671	223-224	QW/X	cAATGg/cg	-	HIGH	GRAMD2A	protein_coding	EXON=1/12		ENSCAFT00000062606.1:c.668_671del	ENSCAFP00000065631.1:p.Gln223ArgfsTer38	-1	VGNC		ENSCAFP00000065631
P3	Indel.Somatic	31:24144749-24144749	TTTTT	ENSCAFG00000032403	ENSCAFT00000092874.1	ENSCAFT00000092874	Transcript	frameshift_variant	553-554	15-16	43957	-/FX	-/TTTTT	-	HIGH	MAP3K7CL	protein_coding	EXON=1/4		ENSCAFT00000092874.1:c.32_36dup	ENSCAFP00000064878.1:p.Asn13PhefsTer9	1	VGNC		ENSCAFP00000064878	21
P3	Indel.Somatic	31:31841721-31841743	-	ENSCAFG00000044588	ENSCAFT00000065672.1	ENSCAFT00000065672	Transcript	splice_acceptor_variant,non_coding_transcript_exon_variant,intron_variant	?-333	-	-	-	-	-	HIGH		lncRNA	EXON=3/3	INTRON=2/2	ENSCAFT00000065672.1:n.330-18_333del		-1
P3	Indel.LOH	33:29046187-29046187	T	ENSCAFG00000012807	ENSCAFT00000020314.5	ENSCAFT00000020314	Transcript	frameshift_variant	308-309	308-309	103	P/PX	cca/ccTa	-	HIGH	MUC20	protein_coding	EXON=1/4		ENSCAFT00000020314.5:c.308_309insT	ENSCAFP00000018847.5:p.Leu105ThrfsTer50	1	VGNC		ENSCAFP00000018847
P3	Indel.LOH	35:12233455-12233455	TG	ENSCAFG00000041180	ENSCAFT00000079006.1	ENSCAFT00000079006	Transcript	frameshift_variant	704-705	460-461	154	M/MX	atg/aTGtg	rs851259266	HIGH		protein_coding	EXON=4/4		ENSCAFT00000079006.1:c.473_474dup	ENSCAFP00000058288.1:p.Arg159CysfsTer?	1			ENSCAFP00000058288	14
P3	Indel.Somatic	36:5793614-5793614	A	ENSCAFG00000009598	ENSCAFT00000015277.4	ENSCAFT00000015277	Transcript	frameshift_variant	590-591	30-31	44115	-/X	-/T	-	HIGH	PLA2R1	protein_coding	EXON=1/29		ENSCAFT00000015277.4:c.30dup	ENSCAFP00000014137.3:p.Val11CysfsTer5	-1	VGNC		ENSCAFP00000014137
P3	Indel.Somatic	36:5793614-5793614	A	ENSCAFG00000009598	ENSCAFT00000075707.1	ENSCAFT00000075707	Transcript	frameshift_variant	590-591	30-31	44115	-/X	-/T	-	HIGH	PLA2R1	protein_coding	EXON=1/28		ENSCAFT00000075707.1:c.30dup	ENSCAFP00000046395.1:p.Val11CysfsTer5	-1	VGNC		ENSCAFP00000046395
P3	Indel.Somatic	36:5793614-5793614	A	ENSCAFG00000009598	ENSCAFT00000089986.1	ENSCAFT00000089986	Transcript	frameshift_variant	590-591	30-31	44115	-/X	-/T	-	HIGH	PLA2R1	protein_coding	EXON=1/28		ENSCAFT00000089986.1:c.30dup	ENSCAFP00000049926.1:p.Val11CysfsTer5	-1	VGNC		ENSCAFP00000049926
P3	Indel.Somatic	36:5793614-5793614	A	ENSCAFG00000009598	ENSCAFT00000066454.1	ENSCAFT00000066454	Transcript	frameshift_variant	590-591	30-31	44115	-/X	-/T	-	HIGH	PLA2R1	protein_coding	EXON=1/28		ENSCAFT00000066454.1:c.30dup	ENSCAFP00000062092.1:p.Val11CysfsTer5	-1	VGNC		ENSCAFP00000062092
P3	Indel.LOH	38:23536786-23536786	T	ENSCAFG00000011401	ENSCAFT00000060962.1	ENSCAFT00000060962	Transcript	frameshift_variant	1231-1232	836-837	279	R/RX	cgg/cgAg	rs852611374	HIGH	KIRREL1	protein_coding	EXON=6/12		ENSCAFT00000060962.1:c.836_837insA	ENSCAFP00000064832.1:p.Ala283SerfsTer44	-1	VGNC		ENSCAFP00000064832
P3	Indel.Somatic	38:70958-70958	GCGGGGCGGGGCGGGGCGG	ENSCAFG00000009450	ENSCAFT00000015026.3	ENSCAFT00000015026	Transcript	frameshift_variant	507-508	23-24	8	R/RRGGAGRX	cgg/cgGCGGGGCGGGGCGGGGCGGg	-	HIGH	BTG2	protein_coding	EXON=1/2		ENSCAFT00000015026.3:c.36_37insGGGCGGGCGGGGCGGGGCG	ENSCAFP00000013904.3:p.Arg13GlyfsTer34	1	VGNC		ENSCAFP00000013904	13
P3	Indel.LOH	4:13687388-13687409	-	ENSCAFG00000012979	ENSCAFT00000059854.1	ENSCAFT00000059854	Transcript	inframe_deletion	172-192	172-192	58-64	PRTPGPA/-	CCTCGCACCCCGGGCCCCGCC/-	-	MODERATE	CABCOCO1	protein_coding	EXON=1/6		ENSCAFT00000059854.1:c.199_219del	ENSCAFP00000044373.1:p.Thr67_Arg73del	1	VGNC		ENSCAFP00000044373	27
P3	Indel.Somatic	4:25292801-25292825	-	ENSCAFG00000015357	ENSCAFT00000024383.5	ENSCAFT00000024383	Transcript	inframe_deletion	3312-3335	3312-3335	1104-1112	EEEEEEEEV/E	gaAGAAGAAGAAGAAGAAGAAGAAGTa/gaa	-	MODERATE	KAT6B	protein_coding	EXON=14/16		ENSCAFT00000024383.5:c.3335_3358del	ENSCAFP00000022633.5:p.Val1112_Glu1119del	1	VGNC		ENSCAFP00000022633	23
P3	Indel.Somatic	4:25292801-25292825	-	ENSCAFG00000015357	ENSCAFT00000066566.1	ENSCAFT00000066566	Transcript	inframe_deletion	2247-2270	2247-2270	749-757	EEEEEEEEV/E	gaAGAAGAAGAAGAAGAAGAAGAAGTa/gaa	-	MODERATE	KAT6B	protein_coding	EXON=12/14		ENSCAFT00000066566.1:c.2270_2293del	ENSCAFP00000056842.1:p.Val757_Glu764del	1	VGNC		ENSCAFP00000056842	23
P3	Indel.Somatic	4:25586589-25586590	-	ENSCAFG00000015427	ENSCAFT00000024477.5	ENSCAFT00000024477	Transcript	frameshift_variant	450	450	150	G/X	ggC/gg	-	HIGH	ZNF503	protein_coding	EXON=2/2		ENSCAFT00000024477.5:c.450del	ENSCAFP00000022724.4:p.Ser151AlafsTer16	-1	VGNC		ENSCAFP00000022724
P3	Indel.LOH	4:35010981-35010981	T	ENSCAFG00000016196	ENSCAFT00000066739.1	ENSCAFT00000066739	Transcript	frameshift_variant	2116-2117	1394-1395	465	G/GX	ggg/ggAg	-	HIGH	GDF10	protein_coding	EXON=2/2		ENSCAFT00000066739.1:c.1394_1395insA	ENSCAFP00000054838.1:p.Arg467GlnfsTer?	-1	VGNC		ENSCAFP00000054838
P3	Indel.LOH	5:13866056-13866057	-	ENSCAFG00000012000	ENSCAFT00000019061.4	ENSCAFT00000019061	Transcript	splice_acceptor_variant,frameshift_variant	1274	1162	388	S/X	Tcc/cc	rs852965016	HIGH	TRIM29	protein_coding	EXON=4/11		ENSCAFT00000019061.4:c.1162+1del		1	VGNC		ENSCAFP00000017668
P3	Indel.LOH	5:21323892-21323898	-	ENSCAFG00000014183	ENSCAFT00000022537.4	ENSCAFT00000022537	Transcript	inframe_deletion	363-368	231-236	77-79	AGR/A	gcGGGGCGg/gcg	-	MODERATE	PPP2R1B	protein_coding	EXON=2/18		ENSCAFT00000022537.4:c.240_245del	ENSCAFP00000020926.4:p.Arg81_Gly82del	1	VGNC		ENSCAFP00000020926	9
P3	Indel.LOH	5:21323892-21323898	-	ENSCAFG00000014183	ENSCAFT00000045654.3	ENSCAFT00000045654	Transcript	inframe_deletion	363-368	231-236	77-79	AGR/A	gcGGGGCGg/gcg	-	MODERATE	PPP2R1B	protein_coding	EXON=2/17		ENSCAFT00000045654.3:c.240_245del	ENSCAFP00000041764.2:p.Arg81_Gly82del	1	VGNC		ENSCAFP00000041764	9
P3	Indel.LOH	5:21323892-21323898	-	ENSCAFG00000014183	ENSCAFT00000082673.1	ENSCAFT00000082673	Transcript	inframe_deletion	363-368	231-236	77-79	AGR/A	gcGGGGCGg/gcg	-	MODERATE	PPP2R1B	protein_coding	EXON=2/17		ENSCAFT00000082673.1:c.240_245del	ENSCAFP00000054753.1:p.Arg81_Gly82del	1	VGNC		ENSCAFP00000054753	9
P3	Indel.LOH	5:21323892-21323898	-	ENSCAFG00000014183	ENSCAFT00000067409.1	ENSCAFT00000067409	Transcript	inframe_deletion	363-368	231-236	77-79	AGR/A	gcGGGGCGg/gcg	-	MODERATE	PPP2R1B	protein_coding	EXON=2/17		ENSCAFT00000067409.1:c.240_245del	ENSCAFP00000055444.1:p.Arg81_Gly82del	1	VGNC		ENSCAFP00000055444	9
P3	Indel.Somatic	5:32330470-32330471	-	ENSCAFG00000016288	ENSCAFT00000025825.4	ENSCAFT00000025825	Transcript	frameshift_variant	133	133	45	A/X	Gcc/cc	-	HIGH	PLSCR3	protein_coding	EXON=2/7		ENSCAFT00000025825.4:c.133del	ENSCAFP00000023981.4:p.Ala45ProfsTer47	-1	VGNC		ENSCAFP00000023981
P3	Indel.Somatic	5:32330470-32330471	-	ENSCAFG00000016288	ENSCAFT00000059729.1	ENSCAFT00000059729	Transcript	frameshift_variant	133	133	45	A/X	Gcc/cc	-	HIGH	PLSCR3	protein_coding	EXON=2/8		ENSCAFT00000059729.1:c.133del	ENSCAFP00000047851.1:p.Ala45ProfsTer26	-1	VGNC		ENSCAFP00000047851
P3	Indel.LOH	5:32592363-32592363	C	ENSCAFG00000031192	ENSCAFT00000042891.3	ENSCAFT00000042891	Transcript	frameshift_variant	999-1000	999-1000	333-334	-/X	-/C	-	HIGH	EFNB3	protein_coding	EXON=5/5		ENSCAFT00000042891.3:c.1001dup	ENSCAFP00000035853.1:p.Thr335TyrfsTer81	1	VGNC		ENSCAFP00000035853	2
P3	Indel.LOH	5:32592363-32592363	C	ENSCAFG00000031192	ENSCAFT00000069246.1	ENSCAFT00000069246	Transcript	frameshift_variant	2385-2386	2247-2248	749-750	-/X	-/C	-	HIGH	EFNB3	protein_coding	EXON=14/14		ENSCAFT00000069246.1:c.2249dup	ENSCAFP00000053849.1:p.Thr751TyrfsTer81	1	VGNC		ENSCAFP00000053849	2
P3	Indel.Somatic	5:4653227-4653243	-	ENSCAFG00000009993	ENSCAFT00000015905.3	ENSCAFT00000015905	Transcript	frameshift_variant	3009-3024	2497-2512	833-838	PGRGRG/X	CCGGGCAGGGGGCGGGgc/gc	-	HIGH	ST14	protein_coding	EXON=19/19		ENSCAFT00000015905.3:c.2497_2512del	ENSCAFP00000014713.3:p.Pro833AlafsTer97	-1	VGNC		ENSCAFP00000014713
P3	Indel.Somatic	5:4653227-4653243	-	ENSCAFG00000009993	ENSCAFT00000088743.1	ENSCAFT00000088743	Transcript	frameshift_variant	3537-3552	2725-2740	909-914	PGRGRG/X	CCGGGCAGGGGGCGGGgc/gc	-	HIGH	ST14	protein_coding	EXON=16/16		ENSCAFT00000088743.1:c.2725_2740del	ENSCAFP00000054215.1:p.Pro909AlafsTer97	-1	VGNC		ENSCAFP00000054215
P3	Indel.Somatic	5:4653227-4653243	-	ENSCAFG00000009993	ENSCAFT00000086026.1	ENSCAFT00000086026	Transcript	frameshift_variant	3120-3135	2308-2323	770-775	PGRGRG/X	CCGGGCAGGGGGCGGGgc/gc	-	HIGH	ST14	protein_coding	EXON=17/17		ENSCAFT00000086026.1:c.2308_2323del	ENSCAFP00000063053.1:p.Pro770AlafsTer97	-1	VGNC		ENSCAFP00000063053
P3	Indel.Somatic	5:4653254-4653254	C	ENSCAFG00000009993	ENSCAFT00000015905.3	ENSCAFT00000015905	Transcript	frameshift_variant	2997-2998	2485-2486	829	Q/RX	cag/cGag	-	HIGH	ST14	protein_coding	EXON=19/19		ENSCAFT00000015905.3:c.2485_2486insG	ENSCAFP00000014713.3:p.Gln829ArgfsTer75	-1	VGNC		ENSCAFP00000014713
P3	Indel.Somatic	5:4653254-4653254	C	ENSCAFG00000009993	ENSCAFT00000088743.1	ENSCAFT00000088743	Transcript	frameshift_variant	3525-3526	2713-2714	905	Q/RX	cag/cGag	-	HIGH	ST14	protein_coding	EXON=16/16		ENSCAFT00000088743.1:c.2713_2714insG	ENSCAFP00000054215.1:p.Gln905ArgfsTer75	-1	VGNC		ENSCAFP00000054215
P3	Indel.Somatic	5:4653254-4653254	C	ENSCAFG00000009993	ENSCAFT00000086026.1	ENSCAFT00000086026	Transcript	frameshift_variant	3108-3109	2296-2297	766	Q/RX	cag/cGag	-	HIGH	ST14	protein_coding	EXON=17/17		ENSCAFT00000086026.1:c.2296_2297insG	ENSCAFP00000063053.1:p.Gln766ArgfsTer75	-1	VGNC		ENSCAFP00000063053
P3	Indel.Somatic	5:4653256-4653261	-	ENSCAFG00000009993	ENSCAFT00000088743.1	ENSCAFT00000088743	Transcript	frameshift_variant	3519-3523	2707-2711	903-904	TG/X	ACCGGg/g	-	HIGH	ST14	protein_coding	EXON=16/16		ENSCAFT00000088743.1:c.2707_2711del	ENSCAFP00000054215.1:p.Thr903AlafsTer75	-1	VGNC		ENSCAFP00000054215
P3	Indel.Somatic	5:4653256-4653261	-	ENSCAFG00000009993	ENSCAFT00000015905.3	ENSCAFT00000015905	Transcript	frameshift_variant	2991-2995	2479-2483	827-828	TG/X	ACCGGg/g	-	HIGH	ST14	protein_coding	EXON=19/19		ENSCAFT00000015905.3:c.2479_2483del	ENSCAFP00000014713.3:p.Thr827AlafsTer75	-1	VGNC		ENSCAFP00000014713
P3	Indel.Somatic	5:4653256-4653261	-	ENSCAFG00000009993	ENSCAFT00000086026.1	ENSCAFT00000086026	Transcript	frameshift_variant	3102-3106	2290-2294	764-765	TG/X	ACCGGg/g	-	HIGH	ST14	protein_coding	EXON=17/17		ENSCAFT00000086026.1:c.2290_2294del	ENSCAFP00000063053.1:p.Thr764AlafsTer75	-1	VGNC		ENSCAFP00000063053
P3	Indel.LOH	5:64463930-64463930	CCGG	ENSCAFG00000019852	ENSCAFT00000079958.1	ENSCAFT00000079958	Transcript	frameshift_variant	991-992	991-992	331	P/PGX	ccc/cCCGGcc	-	HIGH	CBFA2T3	protein_coding	EXON=1/12		ENSCAFT00000079958.1:c.993_994insGGCC	ENSCAFP00000045885.1:p.Arg332GlyfsTer126	1	VGNC		ENSCAFP00000045885	2
P3	Indel.LOH	5:64463930-64463930	CCGG	ENSCAFG00000019852	ENSCAFT00000066937.1	ENSCAFT00000066937	Transcript	frameshift_variant	991-992	991-992	331	P/PGX	ccc/cCCGGcc	-	HIGH	CBFA2T3	protein_coding	EXON=1/10		ENSCAFT00000066937.1:c.993_994insGGCC	ENSCAFP00000054010.1:p.Arg332GlyfsTer51	1	VGNC		ENSCAFP00000054010	2
P3	Indel.LOH	5:64463930-64463930	CCGG	ENSCAFG00000019852	ENSCAFT00000090835.1	ENSCAFT00000090835	Transcript	frameshift_variant	991-992	991-992	331	P/PGX	ccc/cCCGGcc	-	HIGH	CBFA2T3	protein_coding	EXON=1/11		ENSCAFT00000090835.1:c.993_994insGGCC	ENSCAFP00000065354.1:p.Arg332GlyfsTer100	1	VGNC		ENSCAFP00000065354	2
P3	Indel.Somatic	5:77412270-77412271	-	ENSCAFG00000032449	ENSCAFT00000032160.4	ENSCAFT00000032160	Transcript	frameshift_variant	171	171	57	R/X	cgA/cg	-	HIGH	MARVELD3	protein_coding	EXON=1/3		ENSCAFT00000032160.4:c.171del	ENSCAFP00000029948.4:p.Ala59ProfsTer168	1	VGNC		ENSCAFP00000029948
P3	Indel.Somatic	5:77412270-77412271	-	ENSCAFG00000032449	ENSCAFT00000044505.2	ENSCAFT00000044505	Transcript	frameshift_variant	171	171	57	R/X	cgA/cg	-	HIGH	MARVELD3	protein_coding	EXON=1/3		ENSCAFT00000044505.2:c.171del	ENSCAFP00000038453.1:p.Ala59ProfsTer168	1	VGNC		ENSCAFP00000038453
P3	Indel.Somatic	6:14487431-14487434	-	ENSCAFG00000016358	ENSCAFT00000081229.1	ENSCAFT00000081229	Transcript	inframe_deletion	2493-2495	2451-2453	817-818	RR/R	agGAGa/aga	-	MODERATE	BRAT1	protein_coding	EXON=15/15		ENSCAFT00000081229.1:c.2451_2453del	ENSCAFP00000053917.1:p.Arg818del	-1	HGNC	BRAT1	ENSCAFP00000053917
P3	Indel.LOH	6:18462535-18462535	G	ENSCAFG00000017333	ENSCAFT00000027468.5	ENSCAFT00000027468	Transcript	frameshift_variant	998-999	714-715	238-239	-/X	-/G	-	HIGH	LAT	protein_coding	EXON=10/10		ENSCAFT00000027468.5:c.717dup	ENSCAFP00000025545.4:p.Lys240GlufsTer?	1	VGNC		ENSCAFP00000025545	3
P3	Indel.LOH	6:38974017-38974018	-	ENSCAFG00000047824	ENSCAFT00000069467.1	ENSCAFT00000069467	Transcript	frameshift_variant,start_lost	1	1	1	G/X	Ggt/gt	-	HIGH	RPL3L	protein_coding	EXON=1/11		ENSCAFT00000069467.1:c.2del	ENSCAFP00000045944.1:p.Gly1?	1	HGNC	RPL3L	ENSCAFP00000045944
P3	Indel.LOH	6:38974017-38974018	-	ENSCAFG00000047824	ENSCAFT00000074624.1	ENSCAFT00000074624	Transcript	frameshift_variant,start_lost	1	1	1	G/X	Ggt/gt	-	HIGH	RPL3L	protein_coding	EXON=1/11		ENSCAFT00000074624.1:c.2del	ENSCAFP00000046294.1:p.Gly1?	1	HGNC	RPL3L	ENSCAFP00000046294
P3	Indel.LOH	6:69866825-69866831	-	ENSCAFG00000020386	ENSCAFT00000032464.4	ENSCAFT00000032464	Transcript	inframe_deletion	213-218	213-218	71-73	PAP/P	ccGGCCCCc/ccc	-	MODERATE	ST6GALNAC5	protein_coding	EXON=2/5		ENSCAFT00000032464.4:c.213_218del	ENSCAFP00000030233.4:p.Pro73_Ala74del	-1	VGNC		ENSCAFP00000030233
P3	Indel.LOH	7:4911528-4911528	C	ENSCAFG00000032715	ENSCAFT00000048039.2	ENSCAFT00000048039	Transcript	frameshift_variant	218-219	218-219	73	G/GX	ggc/ggGc	-	HIGH	C7H1orf53	protein_coding	EXON=1/3		ENSCAFT00000048039.2:c.218dup	ENSCAFP00000043015.2:p.Ala74ArgfsTer60	-1	VGNC		ENSCAFP00000043015
P3	Indel.Somatic	7:79024757-79024773	-	ENSCAFG00000047832	ENSCAFT00000060443.1	ENSCAFT00000060443	Transcript	frameshift_variant	454-469	454-469	152-157	PASPGS/X	CCGGCCTCTCCCGGCTcc/cc	-	HIGH		protein_coding	EXON=1/3		ENSCAFT00000060443.1:c.476_491del	ENSCAFP00000057724.1:p.Leu159ProfsTer79	1			ENSCAFP00000057724	22
P3	Indel.Somatic	8:44152511-44152512	-	ENSCAFG00000047821	ENSCAFT00000090138.1	ENSCAFT00000090138	Transcript	frameshift_variant	458	7	3	R/X	Cgc/gc	-	HIGH		protein_coding	EXON=1/3		ENSCAFT00000090138.1:c.7del	ENSCAFP00000059433.1:p.Arg3AlafsTer6	1			ENSCAFP00000059433
P3	Indel.Somatic	8:44152572-44152573	-	ENSCAFG00000047821	ENSCAFT00000090138.1	ENSCAFT00000090138	Transcript	frameshift_variant	519	68	23	L/X	cTc/cc	-	HIGH		protein_coding	EXON=1/3		ENSCAFT00000090138.1:c.68del	ENSCAFP00000059433.1:p.Leu23ProfsTer158	1			ENSCAFP00000059433
P3	Indel.LOH	9:19078030-19078040	-	ENSCAFG00000014165	ENSCAFT00000022483.4	ENSCAFT00000022483	Transcript	frameshift_variant	1534-1543	1534-1543	512-515	PTHH/X	CCCACCCATCat/at	-	HIGH	GRN	protein_coding	EXON=10/11		ENSCAFT00000022483.4:c.1534_1543del	ENSCAFP00000020876.4:p.Pro512MetfsTer57	-1	VGNC		ENSCAFP00000020876
P3	Indel.LOH	9:21867315-21867339	-	ENSCAFG00000016007	ENSCAFT00000025391.4	ENSCAFT00000025391	Transcript	inframe_deletion	1377-1400	1377-1400	459-467	GGGSSGGGY/G	ggCGGCGGAAGTTCCGGCGGCGGCTAc/ggc	-	MODERATE	KRT10	protein_coding	EXON=7/8		ENSCAFT00000025391.4:c.1423_1446del	ENSCAFP00000023577.3:p.Tyr475_Gly482del	1	VGNC		ENSCAFP00000023577	46
P3	Indel.LOH	9:37909524-37909524	CTTC	ENSCAFG00000048009	ENSCAFT00000060339.1	ENSCAFT00000060339	Transcript	frameshift_variant,splice_region_variant	156-157	156-157	52-53	-/EX	-/GAAG	-	HIGH	C17orf50	protein_coding	EXON=1/4		ENSCAFT00000060339.1:c.156_157insGAAG	ENSCAFP00000061480.1:p.Met53GlufsTer101	-1	HGNC	C17orf50	ENSCAFP00000061480
P3	Indel.LOH	9:37909525-37909525	T	ENSCAFG00000048009	ENSCAFT00000060339.1	ENSCAFT00000060339	Transcript	frameshift_variant,splice_region_variant	155-156	155-156	52	E/EX	gag/gaAg	-	HIGH	C17orf50	protein_coding	EXON=1/4		ENSCAFT00000060339.1:c.155dup	ENSCAFP00000061480.1:p.Met53AspfsTer100	-1	HGNC	C17orf50	ENSCAFP00000061480
P3	Indel.LOH	9:51924902-51924905	-	ENSCAFG00000019897	ENSCAFT00000031656.4	ENSCAFT00000031656	Transcript	inframe_deletion	3271-3273	3087-3089	1029-1030	SD/S	tcTGAt/tct	rs852619957	MODERATE	SETX	protein_coding	EXON=10/26		ENSCAFT00000031656.4:c.3108_3110del	ENSCAFP00000029470.4:p.Asp1036del	1	VGNC		ENSCAFP00000029470	21
P3	Indel.LOH	9:51924902-51924905	-	ENSCAFG00000019897	ENSCAFT00000084780.1	ENSCAFT00000084780	Transcript	inframe_deletion	3271-3273	3087-3089	1029-1030	SD/S	tcTGAt/tct	rs852619957	MODERATE	SETX	protein_coding	EXON=10/25		ENSCAFT00000084780.1:c.3108_3110del	ENSCAFP00000056398.1:p.Asp1036del	1	VGNC		ENSCAFP00000056398	21
P3	Indel.LOH	X:100409727-100409728	-	ENSCAFG00000046760	ENSCAFT00000060077.1	ENSCAFT00000060077	Transcript	frameshift_variant	2017	2017	673	I/X	Atc/tc	-	HIGH		protein_coding	EXON=1/1		ENSCAFT00000060077.1:c.2017del	ENSCAFP00000062953.1:p.Ile673SerfsTer10	1			ENSCAFP00000062953
P3	Indel.Somatic	X:84634070-84634106	-	ENSCAFG00000045066	ENSCAFT00000082691.1	ENSCAFT00000082691	Transcript	splice_donor_variant,non_coding_transcript_exon_variant,intron_variant	464-?	-	-	-	-	-	HIGH		lncRNA	EXON=3/4	INTRON=3/3	ENSCAFT00000082691.1:n.473+27_473+62del		1
